# Supplementary material
Source: PubMed Central journal article supplement (PMC1172252)
Supplement: pnas_0502272102_2.pdf [file pnas_0502272102_2.pdf]

CLUSTAL X (1.81) multiple sequence alignment

```

MdTLR7          -----FHIYLFVHRICPLLASFLLLLLFIHVRGLYRSF
hTLR7          -----MVFPMTLKRQI
chTLR7          -----MTNLSEVAHRKMHVHARTSN
XtTLR7          -----MRRQL
tetTLR7
fTLR7
hTLR8          -----MKESLQNSSCSLGGKTKKENMFLQS
pigTLR8          -----MTLHF
mTLR8          -----MENMPPQS
MdTLR8          -----MIPQY
XtTLR8          -----IKLLFGLHSCNYTANILFFSPQAKMTGSL
tetTLR8
fTLR8
hTLR9
pigTLR9          -----MGPRCT
mTLR9          -----MVLRRRT
ratTLR9          -----MVLCSRT
MdTLR9
fTLR9          -----M
tetTLR9
XtTLR9          -----YLHLYNIVSLHAQQK
mTLR3          -----MKGCSYLMYSFG
hTLR3          -----MR-QTLPCIYFWG
MdTLR3          -----MERCLIHWSYFFL
chTLR3          -----MTLSSAVEESLATKRKESKGLIFLKINRGYKLG
XtTLR3          -----MGQLWLSLHILYAIY
fTLR3          -----M
tetTLR3
zebTLR3          -----MDLMKLILLPLFYACF
cfishTLR3
hTLR5          -----MGDH
mTLR5          -----MACQ
MdTLR5          -----MGHL
XlTLR5          -----MDSSAPAAA
XtTLR5          -----LCSF
fTLR5          -----MTTS
tetTLR5
troutTLR5      -----MMRN
mTLR13          -----MPKTVKMNGSSFVPSLQLLLMLVGFSLPPVAETYGFNKCTQYEFDIHHVLCIR
ratTLR13          -----MCGSSVPSLQLLLMLIGLSLLSLAETYGFNKCTQYEFDIHHVFCIR
MdTLR13          -----MGPKARGMPLKWLWFI VLEFSLLSLVEMYGFRHCTQYKFNIIHHVLCVR
XtTLR13          -----MPFHWTCPAALMTLILQP--ISFIECYGRKCSLEGIHTEYANCVG
chTLR21          -----MCPSHCCPLWLLLLVTVLTMP--MVHPYGFNRNCIEDVKAPLYFRCIQ
XtTLR21          -----MAILLVALTFVLLIP--GLTSYGFNRNCIQSVIINSYNCIA
fTLR21          -----MWSLSFPLLSVTVLLCATRLVGGYSFHNCEI FSKGK-TFKCIH
fTLR23          -----MLTWSPPVLLCLLLHLRSSISFSLK-NCTVHAGGAS-AEVFVD
tetTLR23          -----MVTWSP--LLLLLLRLRTSFGFSLK-NCTVHAGPAP-AVVLVD
fTLR22          MGSRIK-----RSTFFFSPAFFLLSFSQFVIPLKGFALKNACKISFNVAI-----CS
tetTLR22
halTLR22          MGPGGKGDERTGGRKHFQLVTFVFFLLTISLLAPISGFALK-TCRISYNI AK-----CD
troutTLR22      MTLKITMPGEQSGSTFSQLRFLCFLMYCWLADPVCGYFLN-NCTIRGNLSDNFMNMKVL
XtTLR22          -----MGWLMLQFKMFSLFNCLVLFHLVTRGVSF AIK-GCEVHRQYNL-----KVL
mTLR12          -----MGRYWLLPGLLLSLPLVTG-----WSTSNCLVTEGSRLPLVSR Y
mTLR11          -----MPRMERHQFCSVLLILILTLVSLTLTGAWAITPDCIIADSL LFPNLSY
hTLR4          -----MKPRA
rabbitTLR4      -----MMPR-
pigTLR4          -----MIPR-
mTLR4          -----MMPP-
MdTLR4          -----MPAI
chTLR4          -----LHKLP
XtTLR4          -----H
zebTLR4
hTLR2          -----MPHTL
rabbitTLR2      -----MPPAL
pigTLR2          -----MPCAL
mTLR2          -----MLRAL
MdTLR2          -----MRQIR
chTLR2          -----MFNQSKQKPTMKLM
XtTLR2          -----MMQSI S
fTLR2          -----M
halTLR2          -----MGQQMIPL

```

zebTLR2 -----MRLVGTM  
 hTLR1 -----MT  
 mTLR1 -----MT  
 hTLR6 -----MT  
 pigTLR6 -----MT  
 mTLR6 -----MVKSLWDSLNCMS  
 MdTLR1L -----MCTTKLWF  
 hTLR10 -----  
 ratTLR10 -----  
 MdTLR10 -----  
 chTLR1L1 -----  
 XtTLR1L3 -----  
 XtTLR1L1 -----  
 XtTLR1L2 -----MRVH  
 fTLR1 -----MSQNSF  
 tetTLR1 -----  
 tetTLR14 -----MICIFLH  
 fTLR14 -----MIWTFVH  
 XtTLR14 -----MEKLSH  
 XtTLR14L1 -----MNPVLQ  
 XtTLR14L2 -----QVPFLQNLFFPNR  
 XtTLR14L3 -----MEMFRR  
 XtTLR16 -----MDLCFKRKHWKTCYYLIGCIL  
 chTLR15 -----MRI

MdTLR7 LILFHLFILY----KLPRARWFPKTLPCNVQTQNIMEASVMVNCTEKHLTEIP-----  
 hTLR7 LILFNILIS----KLLGARWFPKTLPCDVTLDVDPKNHVIVDCTDKHLTEIP-----  
 chTLR7 ALLFVLLFLFP---MLLSGRWFPKTLPCDV--EAFESTVRVDCSDRRLKEVP-----  
 XtTLR7 LFFLISILSFS---GLLATNWFPKSLPCDVEQNAKGNVIVVDCSDRHLTSIP-----  
 tetTLR7 MFFFLILGICPLCILTANVSYPKTLPCDVT--NNGSVNVVDCTERSLTDVP-----  
 fTLR7 MFLLLILGLWCPLCILTANVSYPKTLPCDVT--NNGSVNVVDCTERSLKGVP-----  
 hTLR8 SMLTCIFLLISGSCELCAENFSRSYPCDEKK--QNDSVIAECSNRRLQEV-----  
 pigTLR8 LLLTCLFLLIPDSCEFFTGANYRSYPCDERK--ENGSVIAECTNRQLQEV-----  
 mTLR8 WILTCFLLSSGTSIAIFHKANYRSYPCDEIR--HNSLVIAECNHRQLHEVP-----  
 MdTLR8 LSFTCLCLLVACSPEVLHDHIVNSRGYPCSFVK--NNSFVFADCQGCRLHSVP-----  
 XtTLR8 QTLVLVVLITCNSLECSDTNPNNRTIPCKIAE--NGSSVSFDCSARWLQMP-----  
 tetTLR8 MLLSCLCWISEIHRAECTPAWLQPFPCRVGTG--HNYSRVSFDCSGRHLHRVP-----  
 fTLR8 MLLSCLSWLSELHHAACKPTWLLPQFPCQVTG--YNSSVVFDCSRRHLHQVP-----  
 hTLR9 -----  
 pigTLR9 LHPLSLLVQVTAALATLAQGRLPALFPCLELQP----HGLVNCNWLFLKSVP-----FS  
 mTLR9 LHPLSLLVQAAVLAETLALGTLPAFLPCLELKP----HGLVDCNWLFLKSVP-----FS  
 ratTLR9 LHPLSLLVQAAVLAALALGTLPAFLPCLELKP----HGLVDCNWLFLKSVP-----FS  
 MdTLR9 -----MSLLALARALAHTSFPPQFLPCLELRN----SSVVDCCRSLGVSPP-----FF  
 fTLR9 RFLILCQLLPVIVS-----SINPIFLPCDIDAN----TSRVDCSDRPLRRVP-----  
 tetTLR9 -----PIFLPCDIDVN----TTRVDCSDRHIITHVP-----  
 XtTLR9 RKVFLPLSLGLILGVCLAFCKIPHFPLPCDDFNN---ASTVICRERQLIHVP-----  
 mTLR3 G-----LLSLWILLVSSTNQCTVRY-----NVADCSHLKLTTHIP-----  
 hTLR3 G-----LLPFGMLCASSTTKCTVSH-----EVADCSHLKLTQVP-----  
 MdTLR3 R-----ILPFCMVCTQSVKNCVVRN-----EVADCSHQKLTQIP-----  
 chTLR3 GDEPSKLDNVQKADMVITSLKASVQDNYEVKNTWVSARAVTESLHSAPRRAPL-----  
 XtTLR3 G-----MSLVAGNPCKITED-----LTADCSHLKLSAIP-----  
 fTLR3 T-----GRRHAVYQKKTSCVVQG-----SSADCSHLSLSSIP-----  
 tetTLR3 -----SSCRVQG-----DSADCSHLSLDSIP-----  
 zebTLR3 S-----AHCAGTTNARKSACMIKN-----AKADCSHMNLDAIP-----  
 cfishTLR3 -----  
 hTLR5 LDLLLGVVLMAGPVFG-----IPSCSFDG-----RIAFYRFCNLQV-----  
 mTLR5 LDLLIGVIFMASPVLV-----IPSCSSDG-----RIAFFRGCNLQIP-----  
 MdTLR5 LAFLLGLVFKATSVYG-----IPSCSADG-----QLAFYRFCNLQV-----  
 XtTLR5 YNYRIILFYQLTVIIGGSALALDMMTPCSSIN-----RMANFKFCNLTRMP-----  
 XtTLR5 FLFRVTLFYKLIATIGGSALAFGQIPKCTTIN-----RIAYFFYCNLTHMP-----  
 fTLR5 ALHLVFLWVNLQVSTCY-----PSCTLG-----LIANCAFKNHSWVP-----  
 tetTLR5 -----PCTLYL-----LVADCAFKDLWVP-----  
 troutTLR5 LILLAIFGEYLQVVKCN-----PKCPIYG-----SIAACTSQSLYQV-----  
 mTLR13 KKITNLTEAISDIPRYTTHLNLTHNEIQVLPWPWSFTNLSALVDRLEWNSIWK-----ID  
 ratTLR13 KKITNLTEAISDIPRYTTHLNLTHNYIQVLPWPWSFTNLSALVDRLEWNLIWK-----ID  
 MdTLR13 KNITNLKESIHDLPYVTHLNLTHNIQVTPSRSFVNLSNLVDRLEWNIWD-----LG  
 XtTLR13 QSVVTLADAIQDLPYQTRVNLISENEISKIDGYTFSHLPKQLQELVLRKKNVNG-----VD  
 chTLR21 RFLQSPALAVSDLPPIALNLSYNKMRCLQPSAFAHLTQLHTLDTLTYNLLT-----LS  
 XtTLR21 RGLTQVKSAVGDLPSDVVWVNLISYNNIQLHQGSFGHMPFLRTLRLNHNQLQR-----LD  
 fTLR21 RNQYILGDIKDLPHSTLDTIAVNPVSHIPDRSFIHLRNLQQLRDLRDLNHLGV-----ID  
 fTLR23 CASRELLTVPDDVPRDATTVKLSYNLLTQVKRNDVEHLTKVKFLDLQSNELIAH-----ID

tetTLR23 CSNHRLLSVDDDLPRDATAVNLGYNLLTQVRRNQLQGLTQLKVLDLQSNIAIVH-----VE  
 fTLR22 GNFVKLQDVPQDIPPTVKGFDLSTNKISRIRTTDFKEFRLLLEVLDLKNNIISQ-----VD  
 tetTLR22 -----  
 halTLR22 K--MGLTAAPRDIPSAVKGFDLSENKILRVLVSDFENLPGTLQDLNRFISQ-----ID  
 troutTLR22 CYNRNIEVMPINIPCKVSVLDVAMNNISKIRRLDFKGLSNLKIILNMSRNQISQ-----VD  
 XtTLR22 CYNRDLTKVPAQLPELSFMLDLSHNIKTINRTDFQNLTVLQNLNLSNNRIQY-----ME  
 mTLR12 FTFCRHS-KLSFLAACLVSNNLT-----QTLEVPRTVEGLCLGGTVST-----LL  
 mTLR11 IPFCTSAPGLHLLASCSNVKNLN-----QTLKRVPRNTEVLCLOGMVPT-----LP  
 hTLR4 FRLR-SLSPSP-----RFHCFLNNAV-----LSR  
 rabbitTLR4 LRLAGTLVPAMAFLSYLRPEIWEPCVEVVPNI-----TYQCMENLYK-----IPD  
 pigTLR4 IRLAVATIPAMAFLSCLRSESWDPCVQVVPNI-----SYQCMELNFYK-----IPD  
 mTLR4 WLLARTLIMAL-FFSCLTPGSLNPCIEVVPNI-----TYQCMDQKLSK-----VPD  
 MdTLR4 SACLISLLRHIIHLLY-----HICMGSSWVGR-----ILS  
 chTLR4 FGLHSSVLSAFSTLQLLPEQDLPGSFGRLNDAP---YEATYKLLQLNASSKRYAGFGYGP  
 XtTLR4 FFVAITLYLKVVFLH-----  
 zebTLR4 MSNGERMIFLSSILILVNAGQGQECTELIKNK-----EYSCSGRNLT-----IPG  
 hTLR2 WMVWVLGVIIS--LSKEESSNQAS-LSCDRNG-----ICKGSSGSLNSIPSG-----  
 rabbitTLR2 WTVWALGAIVS--LPTEGAPDLPs-LSCDPAG-----ICDGRSRsFQsIPsG-----  
 pigTLR2 WTAWVLGIVIS--LSKEGAPHQASSLSCDPAG-----VCDGRSRSLSSIPSG-----  
 mTLR2 WLFWILVAITV--LFSKRCSAQES-LSCDASG-----VCDGRSRsFtsIPsG-----  
 MdTLR2 WSVWILCTIIN--FSEEDAPKQTS-LSCDPAGG-----VCDGHSRSLDTIPSD-----  
 chTLR2 WQAWLIYTALAAHLPEEQALRQAC-LSCDATQS-----CNCSFMGLDFIPPG-----  
 XtTLR2 LSCILSLVVT-----VLskGNTDCPCDAAH-----FCHCSMHWEAIPSG-----  
 fTLR2 FFTLLFTLSFCEGQGSIVKVDPRSCDRCDHSFF-----CNCSFAGLTCVpVV-----  
 halTLR2 FTLLPLLLSLCGGQSS--NPGRPSCRSCDLHLS-----CDCSRGQFTHVPIV-----  
 zebTLR2 TAILIMFILAQGLEC-----SQTCK-CDQMYF-----CNCSNNLHQVPTV-----  
 hTLR1 -----SIFHFAlIFMLILQIRIQLSESEF-----LVDRSKNGLIHVPKD-----  
 mTLR1 KPN----SLIFYCIIVLGLTLMKIQLSEECeL-----IKRPNANLTRVPKD-----  
 hTLR6 KDKEPIVKSfHFVCLMIIIVGTRIqFSDGNEF-----AVDKSKRGLIHVPKD-----  
 pigTLR6 KDKKPTVISLHSVYVMTLVWGTLIQFSESEF-----VVDKSKIGLTRVPKD-----  
 mTLR6 QDRKPIVGSFHFVICALALIVGSMTPFSNELES-----MVDYSNRNLTHVPKD-----  
 MdTLR1L IPDPPIINTFHfVLIffVLIlgSVIqHSSQNEF-----IGNYSNSHLShVPHH-----  
 hTLR10 --MRLIRNIYIFCSIVMTAEGDAPELPEEREL-----MTNCSNMSLRKVPAD-----  
 ratTLR10 --MRLISSIYTYNIIMSTEAWAPRPTDEREL-----ISNYSNMALRKVPPD-----  
 MdTLR10 --MGIIRNIYILYSIDLVLGALLPEMNEL-----TNCsQeYfKkVlMG-----  
 chTLR1L1 --MGSLSIYVfAcVfLSilWNNIqPTVENKI-----TANYSgHLLTEVPKN-----  
 XtTLR1L3 AAeYNLYfLFAIIYILAQ-----FESNK-----ALIIRKlHKCFSS-----  
 XtTLR1L1 -----MLSIYILVQ-----SESSK-----ASFIHRRlPRGLSN-----  
 XtTLR1L2 -----MAAIFfLLIYlSSGQcVRQeIFeSHI-----ANYSNKfLFAVPKN-----  
 fTLR1 CPLVLfRlMMGStIAIFCAAMlMPQlSVsYLRN-----YIDLSSRNLSsVPGD-----  
 tetTLR1 -----MGPSILVfCTAATLMLQPSVsYLRN-----YIDLSSRNLSsVPGD-----  
 tetTLR14 -----FGALVVGALTSVTPPPpSTTDAR--LCRVFNsGRsADcVGRQLESVPW-----  
 fTLR14 -----FIALAVGVLASTTPSPpSTTKVTGTGfCRVFNsGRsADcGMQlSSVPW-----  
 XtTLR14 -----HERLVILCILALGLVERAQQQTP---CKTDG--IYANCKGRSLAAVP-----  
 XtTLR14L1 -----NGQLGLWCVLVLGLVRELWCQTP---CLVDESRRfVSCsGRNLVEIP-----  
 XtTLR14L2 CEDPGRVSAQqKVHVCfLLNLlKWTsCQNP---CQRDSTNRYANCQqQDLVEVP-----  
 XtTLR14L3 -----YNepVfYcFLlLlALlKtIWSQNS---CQVDEKQKYANCQqGNLNDVP-----  
 XtTLR16 LfLPSISfGwTVKkCNVADRSMLLRDPMfATRCSLYKNATsLALCGNI TNITADIS-----  
 chTLR15 LIGSLYfYfISfLFSKvNGfLTQRTSPVsSfP-----fYNYSYLNLSSVsQA-----

MdTLR7 ---NGIPsNTNLTlTlNHIPKISPNsFAGLKNLVEIDfRCNCVpVRLGPKDRICtKRPN  
 hTLR7 ---GGIPtNTNLTlTlNHIPDISPASfHRLDHLVEIDfRCNCVPIPLGSKNNMCIKRLQ  
 chTLR7 ---RGIPGNATNLTlTlNHIPRISPASfTQLENLVEIDfRCNCVpPRlGPKDNVCVTPPS  
 XtTLR7 ---WGIPtNVTNLTlTlNHIPRISVDSFAEfTNLVELDFRCNCVPAKVGPKDHVCTKRlD  
 tetTLR7 ---HGIPRDVSNLTlTlNHIPNFNSTsFQGLDNLREVDmRCNCVpVKIGPKDHICtKsVT  
 fTLR7 ---VGIPRDVTNLTlTlNHIPNFNSSsFQGLDNLREIDmRCNCVpVKIGPKDRICtESVT  
 hTLR8 ---QTVGKYVTELDLSDNFIThITNESfQGLQNLTKINLNHNPNVQHqNGNPGIQSNGLN  
 pigTLR8 ---RRVGNyVTELDLSDNFIRrITNESfQGLQNLTKINLNHNAKLWPQS-----ENGMT  
 mTLR8 ---QTIGKYVTNIDLSDNAIThITKESfQKLQNLTKIDLNHNAKQqHPNEN----KNGMN  
 MdTLR8 ---MIFKNVTEVDLSFNsIMEITNKsFAGLLNLTKINLNSNVDSQVENRAN---KRRMN  
 XtTLR8 --YPIKYSSDSVellLSQNLILtINNESfHsWHNLTKIDLNWNHYPKSRlDNADICkRGL  
 tetTLR8 ---KGITsNTDLNLSenLkELLPlAFSTLRNLsRLNLsWANK-----NRGLI  
 fTLR8 ---KGITsNVTDLNLSensIKeisPlAFSTmWNLTKLNLsWANK-----KtGVN  
 hTLR9 MAAP--RGNVtSLsLsSNRIHHLHDSDFAhLPSLRHLNLKwNcPPVg--LSPMHfPCHMT  
 pigTLR9 AAAP--RANVtSLsLsSNRIHHLHDSDFVHLSSLRtLNLKwNcPPAg--LSPMHfPCHMT  
 mTLR9 AAAS--CSNITRLSLISNR IHHLHNSDFVHLsNLrQLNLKwNcPPTg--LSPHLfSCHMT  
 ratTLR9 AAEP--RSNITSLsLIANRIHHLHNLDfVHLpNVRQLNLKwNcPPPg--LSPHLfSCHMT  
 MdTLR9 EATPSALANVTLLLRHNHINHLQPAHFVRLKGLQKLLLRWNCAPTII--LTVLrQsCHMV  
 fTLR9 LIKS---DTVtSLHLSRtKIRHLWQYDLsGVPNLRAfTMADNCQPSs--MKASLHDCEVK  
 tetTLR9 IIRs---NTVtSLRSLRtKlFQVGNLsHMPNLRVfIMADNCQPSG--MKATLHACKVE  
 XtTLR9 HIVS---QsVKVfDLAINEIRLLANSTfSGVPNLVILNLSDNCQPSN--LRPYKEICRLI

|             |                                                                            |
|-------------|----------------------------------------------------------------------------|
| mTLR3       | ---DDLPSNITVNLNTHNQLRRLPPTNFTRYSQLAILDAGFNS-----ISK                        |
| hTLR3       | ---DDLPTNITVNLNTHNQLRRLPAANFTRYSQLTSLDVGFT-----ISK                         |
| MdTLR3      | ---PDLPANITTLNLTNHLKRLPPANLTRYGQLVILDGGFNS-----ISK                         |
| chTLR3      | SLSLLPSPRRGLDISHNQLKLDPENLTEYSNLIYLNAGYNI-----ISK                          |
| XtTLR3      | ---SDLPRNIKALDLSHNQLKLPANLSVYDQLERLDAGFNT-----LHQ                          |
| fTLR3       | ---PDLPRNLTSLDVSHNRLRGIPPESLRPYPGLLHLSVSYNT-----IAK                        |
| tetTLR3     | ---PDLPGNLTSLDMSHNRLRGIPPEALRPYPGLLRLIVNYS-----IAK                         |
| zebTLR3     | ---TDLPTNITTLDVSHNRLKTLSS--SLHMYTNLVNIDASYNS-----LAG                       |
| cfishTLR3   | -----                                                                      |
| hTLR5       | ---QVLN-TTERLLLSFN YIRTVTASSFPFLEQLQLELGSQYTP-----LT                       |
| mTLR5       | ---WILNTTTERLLLSFN YISMVVATSFP LLERLQLELGTQYAN-----LT                      |
| MdTLR5      | ---QVPN-TTTKLLLSFN YIRVVNATSFP LLDQLQFLELGTQNI P-----LT                    |
| XlTLR5      | ---LVSSDTLKL DLSFN YVSEINRTFFPKLYRLVDLNLGSQKTNR-----LI                     |
| XtTLR5      | ---PVNSDTLVLDLSFN YLSEVNSTFFPRLQLVDLNLGSQQTER-----LI                       |
| fTLR5       | ---LLPPNITRLFLNTRN IGEINRSLRLYQELEKLDLGHQV P-----LV                        |
| tetTLR5     | ---VLPPNITHLFLNTRN IGEVNSTSL SAYEQLEKLDLGHQV A-----LV                      |
| troutTLR5   | ---ALPPYITILYMRDNY ISEINETSFSGLEGLKELDLSWQQVNG-----LI                      |
| mTLR13      | EGAFRGLENLTLN LVENK IQSVN-NSFEGLSSLKTLTLLSHNQIT-----H                      |
| rabbitTLR13 | EGAFRGLENLTLN LVENK IGSVN-NSFEGLSNLETLLSHNQIT-----H                        |
| MdTLR13     | PEAFQGLKNLTLN LVENK LQSIN-SSFEGLSSLKTLTLLSHNQIS-----W                      |
| XtTLR13     | TWAFHNLDLIL DLSYNL IQSLDVTDLTKHLQIFDL SHNR IH-----T                        |
| chTLR21     | PGAFNGLGVLVLDLSHNKLTTLAEGVFNLSLGNLSSLQVQHNP LS-----T                       |
| XtTLR21     | PGAFENLTMLEKHLHLSN KINSVN-NSFEVFCGLQNVSWFLDNDL LS-----S                    |
| fTLR21      | QFAFQGLHQLKSLNLSFN YIPELSPSVFDGLHNLTFSLTNN SLK-----R                       |
| fTLR23      | DGSFHLMRS LTKLRLSKNKLSELTAQLFQGLSNLTHL DLSN IIT-----F                      |
| tetTLR23    | GGFAHTGSLKTELSRNKLT ELAENL FQGLHELTSLDLSFN LIR-----F                       |
| fTLR22      | EGAFINLRSLKKNLNRN KLGKLDAGLFDGLQNLTEL RVTRN RLK-----M                      |
| tetTLR22    | -----                                                                      |
| halTLR22    | DGAFANLIFL KELN LN NNKLVTLGENL FHGLSNLTEL RIMSNGIK-----A                   |
| troutTLR22  | NDALLPLKALRELNL AHNRLTTLSDHLFQGLDNL SLLHLDN NLI A-----T                    |
| XtTLR22     | NGAFGKLVALQLLNLTKNR IGSLSRSTFEG LQNLSTLLDNNNIV-----T                       |
| mTLR12      | PDAFSAFPG LKVLALS LH-LTQLLPGALRGLGQLQSLSF-FDSPLRR-----SLF                  |
| mTLR11      | AKAFIRFHS LQLRLQLR-TTSVTSRTFQGLDQLQYLFDDHHPACCL-----SLF                    |
| hTLR4       | -----RCEIQT                                                                |
| rabbitTLR4  | N----IPFSTKNLDLSFN LLEHLGSHSFLHVSELHFLDL-----SRCKIHT                       |
| pigTLR4     | N----IPTSVKILDLSFN YLSHLDSNSFSSFP ELQVLDLS-----RCEIQT                      |
| mTLR4       | D----IPSSTKNIDLSFN PLKILKSYSFSNFSELQWLDL-----SRCEIQT                       |
| MdTLR4      | G----NFPLFKSCLFYTPILL-----CRCDIQK                                          |
| chTLR4      | NHDTTTP IHYYNTGLSRKNELFQHNLTAERNWLLKMIDHFSQVFI ERQLLHLSKRYKMQN-----RC SITV |
| XtTLR4      | -----RC SITV                                                               |
| zebTLR4     | S----LPFSVASLDFSNFLTSLH KRVPVMLNLQLL DLT-----RCYIRQ                        |
| hTLR2       | ----LTEAVKSLDLSN NRITYISNSDLQRCVNLQALVLT SNGIN-----T                       |
| rabbitTLR2  | ----LMATVKSLDLSN NRITYIRSDLHRCVHLRALMLMSNGID-----T                         |
| pigTLR2     | ----LTAAVKSLDLSN NR IAYVGSDDLKCVNLRALR LGANSIH-----T                       |
| mTLR2       | ----LTAAMKSLDLSFN KITYIGHGDLRACANLQV LILKSSRIN-----T                       |
| MdTLR2      | ----LTEAVRQLDLSFN KISHIRELDRNCVNL EALLQSNRIR-----S                         |
| chTLR2      | ----LTGKITVNLNAHNRIK IRTHDLQKAVNLR TLLQSNQIS-----S                         |
| XtTLR2      | ----LPRDVRGLNLSNNA IQIVTETDLQPYDQLQTL LQYN AIH-----T                       |
| fTLR2       | ----TEQALS DLSFN NITVVTAEDLRDHRR LAALNLCCNRLA-----V                        |
| halTLR2     | ----TSRALTL DLSFN NITMVTDVDTGHERLRTL SLHG NRVA-----G                       |
| zebTLR2     | ----PSDVLGLDLSFN QIESINMTDLSYNELIILNLHKNKLR-----H                          |
| hTLR1       | ----LSQKTTILNISQNY ISELWTS DILSLSKLRIL IISHNRIQ-----Y                      |
| mTLR1       | ----LPLQTTFLDLSQNN ISELQTS DILSLSKLRV LIMS YNRLQ-----Y                     |
| hTLR6       | ----LPLKTKVLDMSQNY IAELQVSDMSF LSELTVLRLSHNRIQ-----L                       |
| pigTLR6     | ----LPPQTKVLDVSQNF ITELHSDISF LSQLTVLRLSQNRMQ-----C                        |
| mTLR6       | ----LPPRTKALSLSQNS ISELRMPDISF LSELVRLRLSHNRIR-----S                       |
| MdTLR1L     | ----LSPKTTVLDLSLNN ITEIQIEDFKLLPKLRV LILSHNRIQ-----H                       |
| hTLR10      | ----LTPATTTLDLSYNLLFQLQSSDFHSVSKLRV LILCHNRIQ-----Q                        |
| ratTLR10    | ----VTPATFILDLSYNLLYQVQSSDCHSF SKLRFLILCHNSIQ-----Q                        |
| MdTLR10     | ----MSLKITTM DLSNTFTCQPQNL DLSFP SKLKV LILSHNKIQ-----H                     |
| chTLR1L1    | ----IPVHTHILDLSHNS ISEITNFRFTSLSDLQV LNL SHNLIT-----E                      |
| XtTLR1L3    | ----CPSVCTLLDFTKEN ITHLKTSDFNCF LQRL LNL SHNLIG-----E                      |
| XtTLR1L1    | ----CPSADTQLDFTKRNITQLQTSDFSCFLDKFLNL SYNSIE-----E                         |
| XtTLR1L2    | ----LSSLTTVLDISFN SIATMETSEFN YIFDLQV LNASYNKMK-----Y                      |
| fTLR1       | ----LPKEAEYIDLSLNH IRLKRGDFRNTPI LRFLN ISGNCLD-----S                       |
| tetTLR1     | ----LPKEAEIDLSRNLIQLLQRGDFRNTPI LRFLN ISWNCLE-----S                        |
| tetTLR14    | ---RHLPSSEIDLSYNRLQVINAEDFALFPRLRSLNLKYNNS-----H                           |
| fTLR14      | ---RQFPSPSEIDLSYNRLQVINAEDFALFPRLRSLNLKYNNS-----R                          |
| XtTLR14     | ---KDLPTTLVELDLSYNRLSHIQFDDFASFTHLRALNL SYNNIS-----A                       |
| XtTLR14L1   | ---KNFSVTLEELDMSFN RIFQIKSDDFSAYTNLRALNL SYNQIA-----T                      |
| XtTLR14L2   | ---QDLPVTLQSLDLSYNRLFHIRYEDFSSYTNLRALNL SFNNIS-----T                       |
| XtTLR14L3   | ---KDLPVTLEVL DLS CNWISQIRVDDFSSYTNLQALNL SFNNIS-----T                     |

XtTLR16 -----DVPSTINILCLSGS-NTFIPGGTFANFKRIKYLFMKMPLVR-----  
chTLR15 -----QAPKTARALNFSYNAIEKITKRDFEGFHVLEVLDSLHNHIK-----D

MdTLR7 IDSGSFRNLTKLKSLYLDANQLSE-----IPLD---LPSLQLLSLEANHIFSITRENLT  
hTLR7 IKPRSFSGLYTYLKSLYLDGNQLLE-----IPQG---LPPSLQLLSLEANNIFSIKKNFTS  
chTLR7 IENGSAALTRLKSLYLDANQLSK-----IPRG---LPATLRLLSLEANNIFSIKKNFTS  
XtTLR7 VEDRSFASLYNLRSLYLDGNQLIE-----FPKG---LPPNLQLLSLEINNIISISRNNLS  
tetTLR7 IEENTFNSLKNLQSLYLDGNQLYS-----IPKG---LPSLILLSLEVNIHYYISKANLS  
fTLR7 IEENTFNTSLRNLQSLYLDGNQLYI-----IPEG---LPSLILLSLEVNIHYYISKANLS  
hTLR8 ITDGAFNLNKLRELLLEDNQLPQ-----IPSG---LPELTELSLIQNNIYNTKEGIS  
pigTLR8 ITDGAFNLNHLHRELLLEDNQLRE-----IPTG---LPELRELSLIQNKIILLNNTKNMF  
mTLR8 ITEGALLSLRNLTVLLLEDNQLYT-----IPAG---LPELSELKSLIQNNIFQVTKNNTF  
MdTLR8 ISDGAFFNLKLNRLDLLLEENLLQK-----IPVG---LPPSLTTLTSLVLNNISSISKDNML  
XtTLR8 IENGTFSYLTKELEKLFIDHNYLCK-----IPQG---IPSTLTFLSLSYNNIFSVKQILS  
tetTLR8 IEENLFKNLTKLRELDLKGNGLRN-----IPWN---LPVSVRILKLGNNKILSLNANLS  
fTLR8 ISNNLFRNLTKLQHLRLSGNGMYR-----IPGN---IPVSVRILKMGNNKITSLDAHSLA  
hTLR9 IEPSTFLAVPTLEELNLSYNNIMT-----VPA---LPKSLISLSLSTHTNIMLSDASLA  
pigTLR9 IEPNTFLAVPTLEELNLSYNNIT-----VPA---LPDLSVLSLSLSTHTNIMLSDPTHTLT  
mTLR9 IEPRTFLAMRTLEELNLSYNGITT-----VPR---LPSLVLNLSLSTHTNIMLSDANSLA  
ratTLR9 IEPKTFLAMRMEELNLSYNGITT-----VPR---LPSLTLNLSLSTHTNIMLSDASSLA  
MdTLR9 IEQGTFLVLHHLKELDLGNSITF-----IPE---LPPSLTSLVISYTMILRLDSDTFS  
fTLR9 IDHGAFNRNLSLLQVLNLSGNSLTS-----LPK---LPANLRLVNLQRNHLFNIV--EPL  
tetTLR9 INHFASFRLSLQQLVNLNLSGNSLTS-----LPW---LPEKLVNLQRNHLFNIV--EPL  
XtTLR9 IEPHALVSLKSLTNLDLSGNSLTS-----IPP---LPENIKFLNQLNQHIMISGWEFS  
mTLR3 LEPELQCILPLLKVLNQLHNELSQ-----ISDQTFVFCNTLTELDLMSNSIHKIKSNPFK  
hTLR3 LEPELQCQLPMLKVLNQLHNELSQ-----LSDKTFAFCTNLTELHLSMSNIQKIKNNPFV  
MdTLR3 LEPELQCQLPLLKVLNQLHNELSQ-----LSDKTFAFCLSLTELHLKSNPQKISDNPLK  
chTLR3 LKPGLCCKNPLQLQILKLEHNQLHE-----LPDGVFASCSNLTELNLGYN-IIEVKNDPFK  
XtTLR3 FEPALCKQLMLKTLNLEHNEFTK-----ISENDFTFVHLSLHLSANGLSNIIDGNPFE  
fTLR3 LDGRLCETLPRQLTLDVAHNQVLA-----LREEDLSRCSGLTALILRSN-RLKLQGEPPFS  
tetTLR3 LDGRLCETLPRRLTLNVAHNQVLLT-----LREEDLNPCSGLTELNLSN-RLRLQGEPPFS  
zebTLR3 IEKDLCLSLPHLQFLNAQHNQVYL-----ISEKDLKNCFHLTQLDLSDN-KLKLQGEPPFS  
cfishTLR3 -----

hTLR5 IDKEAFNRNLPNLRILDGSS-----KIYFLHPDAFQ  
mTLR5 IGPGAFRNLPNLRILDGQS-----QIEVLNRDAFQ  
MdTLR5 IEREAFRNLPNLLVLDIGNT-----KIQFLHTDAFQ  
XlTLR5 VVKDSFRNTPNVLKLDLATN-----QLLILDPEGLA  
XtTLR5 VVKDSFRNTPSLVKLDLAYN-----QLLILDSDGLA  
fTLR5 IRSNAFLRQRKLQVLVVLGYN-----RGLQLEPRAFA  
tetTLR5 IRSNAFLRQRKLSVLVVLGFN-----PGLRLEPRTFA  
troutTLR5 IRTNTFQRLLENLAVLYLGYN-----TGLQIEPDAFV

mTLR13 IHKDAFTPLIKLKYLSLSRNNISD-----FSGILEAVQHLPCLERLDLTNNSIMYLDHSP  
ratTLR13 IHKDAFTPLVVKLYLSLSRNRISN-----FSGILEAVQHLPCLERLDLINNSIMYLDHSP  
MdTLR13 IQENAFVPLINLQYLNLSRNAIT-----FSNVLAAVQHLPCLLEVLDLTYNTIASLDCNP  
XtTLR13 IQMGTLGPLGALQELDLDFNNSVD-----FRSVANAVSQLPDFLRLSLSNFIITDLKSEQ  
chTLR21 VSPSALLPLVNLRLSLRGGRLNG-----LGAVAAAVQGLAQLELDDLCENNLTTLKGPE  
XtTLR21 IHPEAFSHLTNLQNLNLSMNLHN-----FEKVVQSIHPLQKLNLTMLCSNQISSLNHT-  
fTLR21 LPHGIFSHLFNLNTLIKQNYLTN-----FSEIAMAVSSLKNLTLLDLFCNRLTSLSHSN  
fTLR23 IHPSTFKDLPSLQTVVLDANRLKE-----MADIRP-LLILPKLRNLTISSNLFTSFQSKD  
tetTLR23 VHTSTFQFLPRLQKLLLDYCNQLE-----VADLQP-LLNLPSLKYLSVGNWFTSFQSQD  
fTLR22 VEPSALKSLVSLTFLDI SNKLCCE-----NIRP--LFQLPNLSVLSMAGNNMRFVSGH  
tetTLR22 -----MAGNKMSVVFQSGD

halTLR22 VTLTSFKPMNSLKFDFSHNKLKH-----ITKVSSILQHLPNLRLEFLKKNDFTTFHSEE  
troutTLR22 ISSSSFQPLSSLKTVNLTKNNLHN-----MKEVQPIVQLPHLQELYIGSNRFTSFQSQE  
XtTLR22 LEPNTFLHLYNLKTIISLSYCNFYK-----LKTLPN-AFQIGTLREINIANSIQTFSTED  
mTLR12 LPPDAFSDLISLQRLHISG-----P-----CLDKKAGIRLPPGLQWLGVTLSCIQDVGELA  
mTLR11 LSPNCFESLRSLSLSFQ-----Y-----CLTYSQSIYLPSTLRLTLRNSCLTKFQDLQ  
hTLR4 IEDGAYQSLSHLSTLILTGNPIQS-----LALGAFSGLSSLQKLVAVETNLASLENFPIG  
rabbitTLR4 IEDDAYQGLKNLSTLILTGNPIQS-----LSPQAFSGLSNLQKLVAVETHLTSLGDFPIG  
pigTLR4 IDDDAYQGLNYLSTLILTGNPIQS-----LALGAFSGLPSLQKLVAVETNLASLEDFPIG  
mTLR4 IEDKAWHGLHLSNLILTGNPIQS-----FSPGFSGLTSLLENLAVAVETKLASLESFPIG  
MdTLR4 IEDDYEGLHNLSTLILTGNPIQS-----LGIRAFYGLPKLQVVTNLMSLEDFPIG  
chTLR4 RRQEVFQALQLLLVLSLLAGCIPSPCLEHLGLAAAFHGLTSLKLVVETSISLSDLP  
XtTLR4 IEDLAFFGLNLTQTLVFTGNPRSH-----WAPLSFFGLFSXHKLIVVETLSLSTELPLR  
zebTLR4 IEKDAFYNVKNLMTLILTGNPIY-----LAPECLNSLYKLRQLVLDVVRLESQ-LQIN  
hTLR2 IEEDSFSSLGSLEHLDLNLSYNSLS-----SSWFK  
rabbitTLR2 IDEDSFSSLGSLEHLDLNNSHLS-----AAWFR  
pigTLR2 VEEDSFSSLGSLEHLDLNLSYNSLS-----SSWFK  
mTLR2 IEGDAFYSLGSLEHLDLSDNLSLS-----SSWFG  
MdTLR2 IDPDSFQLRNLKHLDLSSNSLS-----PSWFN  
chTLR2 IDEDSFGSQKLELDDLSNNSLAHLS-----PVWFG

XtTLR2 INDGSFQPLGNLEELDLSYNNLSHLS-----SAWFR  
fTLR2 IHQSAFEPLWNLEDLNSNNQLTALN-----HRWFH  
halTLR2 IHPAAFDSLWSLEELDLSHNQLTSLN-----PDWFQ  
zebTLR2 IHRDAFKSQHNLEVLDSLNNLNLS-----PSWFH  
hTLR1 LDISVFKFNQELEYLDLSHNKLVKIS-----CH  
mTLR1 LDISVFKFNTELEYLDLSHNEKLVIL-----CH  
hTLR6 LDLSVFKFNQDLEYLDLSHNQLQKIS-----CH  
pigTLR6 LDISVFKFNQDLEYLDLSHNQLQITIL-----CH  
mTLR6 LDFHVFLFNQDLEYLDVSHNRLQNIS-----CC  
MdTLR1L LNISVFKFNQDLEYLDLSHNNLWDIS-----CH  
hTLR10 LDLKTFEFNKELRYLDLSNNRLKSVT-----WY  
ratTLR10 LDTKIFDLNKELSYLDLSYNRLQSIT-----WS  
MdTLR10 LDISIFQFNKELEYLDLSYNSLRNIS-----CY  
chTLR1L1 LDFSAMFNQDLEYLDLSHNNIWTAY-----CQ  
XtTLR1L3 LDCSVFKFNPSLEYLDISNNRLHIKC-----H-SLQ  
XtTLR1L1 LDCSVFQFNPSLEYLDISNNRLHTIQ-----Q-SLQ  
XtTLR1L2 LNSSIFKFNTQLQYLDLFSHNVLRNISG-----T  
fTLR1 IHPETFLHTPLEDLDSHNEKLDLMD-----QPYLQ  
tetTLR1 IHPEVFLGTPLLQDLDLSNNRLKTD-----QPYLQ  
tetTLR14 IYSDAFKNNPGLEVLDIFNNSLLEIP-----AAALA  
fTLR14 IDSDAFKNNPILLEILDFNNSLGEIP-----VAALS  
XtTLR14 IETGSFASNVLLTNLTLFNNSLTEMP-----SALFE  
XtTLR14L1 IENGFSNSNTQLRSLTLFNNSLTEMP-----SALLE  
XtTLR14L2 IECGSFASNTLLRNLTTLFNNSLTEMP-----STLFE  
XtTLR14L3 IDNSSFASNTQLRNLTTLFNNGLTEMP-----STLLE  
XtTLR16 IYPNAFKGLESLESLSAISFLGHSKCNNLSIPTDAFSNLYYLRDLSIEGFKLVKSMLIHLP  
chTLR15 IEPGAFENLLSLVSVDSLFDNKNLLVSG-----LAPHL

MdTLR7 DLVNIILYLGQNCYFRNPCNDSFSSIEKDAFQSLRNLTLLSLKANNLTAVPTVLPSSLTE  
hTLR7 ELANIEILYLGQNCYFRNPCVVSYSIEKDAFLNLTCLKVLSLKDNNTAVPTVLPSTLTE  
chTLR7 ELRNIEILYLGQNCYFRNPCNVSFEIEETAFLNLTCLVLSLKSNLTFIPPNLSSTLKE  
XtTLR7 ELSNIQMLYLGQNCYFRNPCSDSFKIEKDAFKDLKNSILSMKSNLSFVPGGLSDSLKE  
tetTLR7 EIRNVEILYLGQNCYFRNPCNFSYGIEDGAFLELYNLKLLSLKSNLSFIPHHLPSLKE  
fTLR7 EIRNIESLYLGQNCYFRNPCNFSYGIEGAFLELHNLKLLSLKSNLSFIPHHLPSLKE  
hTLR8 RLINLKNLYLAWNCYFN-KVCEKTNIEDGVFETLTNLELLSLSFNLSLHVPPKLPSSLRK  
pigTLR8 GLRKLESYLGWNCYFT--CNETFIIDEGAFENLTNLKVLSSFNLTLYRVPPKLPSSLTK  
mTLR8 GLRNLERLYLGWNCYF--KCNQTFKVEDGAFKNLIHLKVLSSFNLSFVPPKLPSSLRK  
MdTLR8 GLTHLSSLYLGWNCYFNGCERNVSIEDGAFELTNLTNLSLSSFNLSLHVPPKLPSSLKE  
XtTLR8 PLINLKNLFLSNNCYFGNECGQVLDIEEGTFSGLTELSLSSFNLSLHVPPKLPSSLKQ  
tetTLR8 SLKNVTHLYLSKNCYRWNICGTSVSDNDSDVFNMNQLVFLSLSYNLTVRVPKLPKSLRV  
fTLR8 GLKNVTHFSLSRNCRWNPCKGHVSIKDSFSMSNLSVFLDLSFNLSLQVPPKLPSSLQF  
hTLR9 GLHALRFLYMDGNCYKNPCREGEVVPRALENLHLENLSLKYNNLTVVPRSLPPSLET  
pigTLR9 GLHALRYLYMDGNCYKNPCQGALEVVPGALLGLGNLTHLSLKYNNLTVVPRSLPPSLET  
mTLR9 GLYSRLVFLYMDGNCYKNPCGAVKVTGALLGLSNLTHLSLKYNNLTVVPRSLPPSLEY  
ratTLR9 GLHSLRVFLYMDGNCYKNPCGAVNVTPDAFLGLSNLTHLSLKYNNLTVVPRSLPPSLEY  
MdTLR9 GLCGLRSLYMDGNCYKNPCREGEVVPRALENLHLENLSLKYNNLTVVPRSLPPSLRM  
fTLR9 KTPHLQELYLTKNCFYANPCQQSLEISKTVFRELSRLKTLTAYNNLTSVPEGLPSSLEI  
tetTLR9 KTPYLKELNLAKNCFHANPCQLSNISSVFSLSQLKTLSLAQNNLTSVPKALPSSLEH  
XtTLR9 RLNNVVMIRLGYNCFYSKQCEP-FHLSDSAFINNEFLEELALSFNNTSFPQNLPSIRI  
mTLR3 NQKNLIKLDLSHNGLSSTKLGTVQLENLQELLLAKNKILALRSEELFLG--NSSLRK  
hTLR3 KQKNLITLDLSHNGLSSTKLGTVQLENLQELLLSNNKIQALKSEELDIFA--NSSLKK  
MdTLR3 NLKNLHLLDLSHIGLSSAKLGTQVQLENLQELLLTNNKIRMLKREDFDYLG--NSSLRK  
chTLR3 TLENLNLIDLSHNHLSANLGLQQQLKNLRELVLVYSNQITELNKEDLKFLS--NTSLNS  
XtTLR3 KLEVRYSTDMSHNKMIISTALGNKQQLKNLKELYLNSNKISKLNKEAFEFLA--NTSLQK  
fTLR3 GLQKLTLYLDVSLNQLSARLGRPQLPALVNLSLAQNGITVLKRDDFSFLN--HSSSLRV  
tetTLR3 GLQNLKYLDVSLNKLQ SARLGRPQLPALVTLSLAHDITISVLRDDFSFLN--HSSFFRV  
zebTLR3 LLKNLTWLDVSRNKLTSAKLGTQPQLPNLVTLVLSGNNINILQKNDFSFLS--NSSSFRV  
fishTLR3 -----  
hTLR5 GLFHLFELRLYFCGLS-----DAVLKDGYFRNLKALTRLDLSKNQIRSLY----LHPSF  
mTLR5 GLPHLLELRLFCGLS-----SAVLSDGYFRNLYSLARLDLSGNQIHSLR----LHSSF  
MdTLR5 GLFNLVQLQLYYCHLS-----DSILKDGYFRNLSSLAIDLSSNEIENLQ----LHPSF  
XlTLR5 GLSQLKILFLYYNKLN-----GSILENDYFKDLTSLEYVDLSSNEIAYLK----PNPLF  
XtTLR5 GLSQLKILFLYYNKLN-----GSILENDYFKDLMSLEYVDLSSNEITYLR----PNPLF  
fTLR5 GLFRLQQLFLDYCGLT-----ESVLAESYLAPLLSLQELLDLYGNQISTLR----PGLFF  
tetTLR5 GLFRLQQLSLDYCELN-----HTVLAGSYLEPLLSLRKLDLFGNQISALR----PGRFF  
troutTLR5 GLSNLRALSRYRCDLT-----ESILQGDYKPLVLSLETLDLYGNQVQKIQ----PALFF  
mTLR13 --RSLVSLTHLS--FEGNKLRELN-FSALSPLNLTNLSASRNGNKVIQNVYLKTLTPQLKS  
ratTLR13 --RSLVSLTHLS--FEGNLTLEN-FSTLSPLNLTNLSAQNGHGVIQDVYLKTLTPQLQS  
MdTLR13 --TTLVSLTKLI--LMKNLVDLD-FSTLSPLNLTTLVDSQN--ALQNVHLDTLPQVQR  
XtTLR13 SVTVLSSLQSLN--LRNNSISVLD-FTFYSMPSLIELNVTNRNLSAVNKSFSFNPLMAK  
chTLR21 -PPLPASLLTLQ--LCNNSLRELGGSPDMLWHVKILDLSYNSISQAEVFTQLHLRNLSL

XtTLR21 -HRLPSTLRWLF--LCKNQLATLD-CQDFFLNISWLDLSYNNIATSSLQTMDLRKVIYL  
fTLR21 -VSLPESLNRLY--LCRNNLSTLG-CEPSFLGSI EILDLSYNSELPTKALEGVNLRIRNY  
fTLR23 LLLDQPSSLRVL--DVSYSIFEAFSISAATFPHEMIDLS----QSAFTWNI TDRTSLQN  
tetTLR23 LQLQQPSSLTAL--DVSFSRFEAFSIWPATFPHEVLNLS----NCVFKWEITDRSSPEN  
fTLR22 LTN-TSLQLKSL--DLSRNPITVFRITADILPNTLWLNLRGTFFKKRQVTWVDVR--TFLGN  
tetTLR22 LTN-TSLKLL--DLSKNPIRIFRITADIFPNTLWLNIGGTFKTQITWVDVG--TFLGR  
halTLR22 LTN-SSLQLKAL--DLSQNPITDFRITANVFPNTLWLNIGGAPGKTPVILGVHNKTFFSR  
troutTLR22 ISN-MSIELRLL--DLSRNPGLVFRITTDVLPYLEVLDIAYCGQLGHMEVDLDRSFLRN  
XtTLR22 IVN-VSASLRSV--DASRNPF SVISFPMSILENLTNLDIS--LTQRPILWYVKEPCFLRG  
mTLR12 GMFPDLVQSSS--RVSWT-----LQKLDLSSNWKLKMASPGSLQGLQVEI  
mTLR11 RLFPDLLLSTSS--TPNIKPGAPF-----LETLDLSYNLQKQAGVRDLYGLTLHS  
hTLR4 HLKTLKELNVAHNLIQS-----FKLPEYFSNLTNLEHLDLSSNKIQSIYCTDLRVLHQ  
rabbitTLR4 HLKTLKELNVAHNLIHS-----FSIPDYFSNLSSEHLDLSSNKIQSIYHKDLRVLHQ  
pigTLR4 HLKTLNELNVAHNHIHS-----FKLPEYFSNLPNLEHLDLSSNKIENIYHEHLQVLHQ  
mTLR4 QLITLKKLNVAHNF IHS-----CKLPAYFSNLTNLVHVDLSYNYIQITWVDFLRE  
MdTLR4 HIITLQELHLGHNSISS-----LQLPSYFASFSSMKHLDLHLNQIKNISDGDLEPVKL  
chTLR4 HLNTLQELNLGHNNIAS-----LKLPKYFANLTSRHLFSFSSNNITYISKGDLDALRE  
XtTLR4 NITSLRELYAGHNKLS-----LLFTSLLVNLDLHGQNQITEIKDNDLDIRG  
zebTLR4 NLTKLQDLKVGTCNIQS-----MTPSFMSTFKDFSLDLHANNISIRMDTAVLRE  
hTLR2 PLSSLTFLNLLGNPYKT-----LGETSLFSHLTKLQILRVG-----NMDTFTKIQR  
rabbitTLR2 PLSSLKFLNLLNENPYRT-----LGETSLFSHLPHLRILKVG-----SLYAFANIRR  
pigTLR2 SLSTLKFLNLLGNPYKT-----LGEAPLFSHLPNLRILKIG-----NNDTFPEIQA  
mTLR2 PLSSLKYLNLGMNYPYQT-----LGVTSLFPNLTNLQTLRIG-----NVETFSAIR  
MdTLR2 SLSSLRVLYLHKNPYQR-----LGQSPFLSHLPSLRVLKVG-----SYDRFSELQK  
chTLR2 PLFSLQHLRIQGNYSYD-----LGESSPFSSLRNLSLHLG-----NPQFSIIRQ  
XtTLR2 NLYNLKHLNLLGNQYLT-----LGNNSLFASLSSLSLQFG-----NQDFSAIQK  
fTLR2 KLEALRVLNLHNPYSC-----LGSPPAFQRLNLRRLRFG-----GPALEEKR  
halTLR2 ELGALLRLNLLHNPYRC-----VGSSPVFHGLVRLRRLAFG-----GPALEEIKM  
zebTLR2 KLKSLQQLNLVGNPYST-----VGPAPIFSSLVNLRTLHLG-----SPSLRELHK  
hTLR1 PTVNLKHLDL SFNAFDA-----LPICKEFGNMSQLKFLGLST---THLEKSSVLP IAH  
mTLR1 PTVSLKHLDL SFNAFDA-----LPICKEFGNMSQLQFLGLSG---SRVQSSSVQLIAH  
hTLR6 PIVSFRHLDL SFNDFKA-----LPICKEFGNLSQLNFLGLSA---MKLQKLDLLPIAH  
pigTLR6 PITSLKHLDL SFNDFEA-----LPICKEFGNLTQLNFLGLSA---TKLQQLDLLPIAH  
mTLR6 PMA SLRHLDL SFNDFDV-----LPVCKEFGNLTKLTFGLSA---AKFRQLDLLPVAH  
MdTLR1L LLMNLIHLDL SFNEFEF-----LPICEEFNSLSQLDFLGLSA---KRISQSDFLPVSH  
hTLR10 LLAGLRYLDL SFNDFDT-----MPICEEAGNMSHLEILGLSG---AKIQKSDFKIAH  
ratTLR10 SLVDLRHLDL SFNDFDT-----LPACEEIGNMRHLETGLSG---AKIQRSDLQKIAN  
MdTLR10 PLLGLKHLDL SFNDFNN-----IPICQEFSGMSQLEFLGLSG---AQIQKSHLQKVAH  
chTLR1L1 LLARLHLDL SFNKFTV-----LPICQEFGIMFHLEYLGLSA---MVI RRSDFRYVAH  
XtTLR1L3 YIKNIKRMDSL YNNFKT-----MDFCSEFTALSQKHLGLSS---KKIQKDSFINIAS  
XtTLR1L1 YIKHIKHLDSL YNNFKQ-----MHFCKEFTALSQKHLGLSA---EQIQTNSFLNIAP  
XtTLR1L2 FPSHIQHLDISFN NFQT-----LSVCSGFNGMVLLLEYLGLGA---DQILKSDFEIGVH  
fTLR1 HTENLVALNLAHNKFLT-----MTLAREFGSLVKLQRLTLGG---STISQSDFLNIAD  
tetTLR1 RAGNLLFLNLAYNKFVT-----MTLAREFSSLAKLERLTLGG---NVIRVGD FGN IAD  
tetTLR14 PLLNLKLYMSNNLYKN-----ATLADTFSTFVGLQTL SLGGPLVEGLKKEDFQPLKN  
fTLR14 PLLNLKLYMSNNLYKR-----AALAEFTSTFVRLQTL SMGGPLVEGLKKGDFQPLRK  
XtTLR14 PLRFLQFLDISNNFYNC-----ALTGAEFSMLENLRNLSIGGPLVSKVLKGDFAPIKN  
XtTLR14L1 PLHLLEFLDMSNNFYNK-----STLGDVFOQLVNLQTL SIGGPLVSKVQKDDFVP I RN  
XtTLR14L2 PLLLLEFLDVSNNLYNY-----STLGKVFENLVNLQNLAI GGPLVSKVLKDDFAP I KN  
XtTLR14L3 PLLLLEVLDLSDNLYNY-----STLGKVFKTLANLRSLSIGGPFVSKVLRGDHVP I KN  
XtTLR16 FSTLSYLSLPTNCITD-----LFHVFIHQNLIFIHNLVDVGSNKIERVSLQFDVNLISL  
chTLR15 KL IPTSGASGPSQIYMYFQKSAEAAL EPSAPAE LPHLEDPNPGVNVNPRFRQRTEENK

MdTLR7 LY LH-NNNIQRFKKDDFHNL YLQQLIDLSGNCPRCFNVFPFCIPCPNNSPLVIHGGAFDS  
hTLR7 LYLY-NNMIAKIQEDDFNNLNQLQILDLSGNCPRCYNAPFP CAPCKNNSPLQIPVNAFDA  
chTLR7 LYIY-NNRIQEVQEHDLNLYNLEILDLSGNCPRCYNAPY PCTPCPNIS- IKIHSKAFYS  
XtTLR7 LYLY-NNAIQYIEEHDLNINLEILDLSGNCPRCYNSPFPCTPCPNNAPIQIHPKAFSS  
tetTLR7 LYLY-NNNFQSVSAEDFKNLTNLEILDLSGNCPRCYNVFPFCNCPNNA PLKISKEAFKT  
fTLR7 LYLY-NNNFQQVTD EDFKNLTNLEILDLSGNCPRCYNVFPFCNCPNNSPLQISKSFAKT  
hTLR8 LFLS-NTQIKYISEEDFKGLINLTLLDLSGNCPRCFNAPFP CVPCDGGASINIDRF AFQ N  
pigTLR8 LYLS-NTKIRNINQEDFKGLENLRVLDLSGNCPRCFNAPFP CNPCPGDASIQIHP LAFRY  
mTLR8 LFLS-NAKIMNITQEDFKGLENLTLLDLSGNCPRCYNAPFPCTPCKENSIHIHPLAFQS  
MdTLR8 LYLS-NNKIKNISQDDLK GLENLRVLDLSGNCPRCFNSPFP CVPCENGASIQIHPDAFQ N  
XtTLR8 LYLS-NNNIQIINRNDFHNLVNLVLYLSGNCPRCFNANYPCKNLCPNTSLKDH-FAFQ N  
tetTLR8 LQLD-NNKIQI IHSDDFQSLRKLKALKLEGNCPRCKNAPFPCEPCQN-MSLR IHPKAFYD  
fTLR8 LKLD-NNKIQNIYSDDFYGLQNLKELKLEGNCPRCENAPFPDCTCQN- ISVRIHPNAFDY  
hTLR9 LLS-YNRIVKLAPEDLANLTALRVLDVGGNCRCDHAPNCPMECPRHF- PQLHPD- TFS  
pigTLR9 LLS-YNHIVTLTPEDLANLTALRVLDVGGNCRCDHARNPCRECPKH- PKLHSD- TFS  
mTLR9 LLVS-YNLIVKLGPELANLTSLRVLDVGGNCRCDHAPNPCI ECGQKS- LHLHPE- TFH  
ratTLR9 LLS-YNLIVKLGPELANLTSLRVLDVGGNCRCDHAPDLCTECRQS- LDLHPQ- TFH  
MdTLR9 LLIS- SNRIVSLSPQDFVGLPALQVLDVSRNCRCDHAPNCPQECPPGF- PKVHPD- TFS

fTLR9 LDLS-ENTITEVLEGAFADLTHLRELNLEWNCQRCRDRAARPCFPCPRHLPLQLHKSFSFYA  
 tetTLR9 LDLS-ENTITEVLEGTADFHLNHLNLEWNCQRCDHAAQPCFPCPKNQPLQLYSKSFYT  
 XtTLR9 LDLS-ENKISKIDREDLCNLNLYSLDLQWNCQRCDHALQACYPCKNNSALLLVPG-VFD  
 mTLR3 LDLS-SNPLKEFSPGCFQITIGKLFALLLNNAQLNPHLTEKLCWELSNTS-----  
 hTLR3 LELS-SNQIKFSPGCFHAI GRLFGLFLNNVQLGPSLTEKLCLELANTS-----  
 MdTLR3 LDLS-SNHLIEFSPDCFRSIGKLYDLSLNNVQLGPELTEKLCLELSSTS-----  
 chTLR3 LDLS-SNPLKEFHTGCLHAI GNLFGFLI LNVELGENRTRKLCLELSDTA-----  
 XtTLR3 LDLS-SNPLTEINPGCFQAIGSFAALVIQNTQLDPQRTEQVCSELAHTG-----  
 fTLR3 LNLS-SVPLKTEPGCLKPISGLSTLILDGSNMGALVIAGICSQLSGTA-----  
 tetTLR3 LNLS-SVLLKELEPGCLKPISGLSTVILDGTNTGTQVI AKLCELSGTA-----  
 zebTLR3 LILS-SLILKKEVNGCFKAIDTLYDLVLDSSKLT SQFTTSLFEELADTA-----  
 cfishTLR3 -----QDLVLDGCKLNPSFMSRLCEELSDTS-----  
 hTLR5 GKLN-SLKSIDFSSNQIFLVCEHELEPLQKTL SFFSLAANSLSYRVS-----  
 mTLR5 RELN-SLSDVNFAFNQIFTEICEDELEPLQKTL SFFGLKLTCLFSRVS-----  
 MdTLR5 GNLE-SLKSIDL SLNHISLICRDLQKRFSLFNLSANNLYSKVS-----  
 XlTLR5 YHLY-SLSILILRYNHISICAGDLHSFEMKNFTFMDLSDNFYFNWET-----  
 XtTLR5 YHLY-SLDI INLRHNQISSICAGDLHSFERKYFTIMELSHNRFNKWE-----  
 fTLR5 SOLT-YFTELNLDLNP IERLCESDLVGFQKSFHRLSLSAHLKYKMNDA-----  
 tetTLR5 SKLQ-HFTELNKLNPIERLCESDLAGFQKHFGLYLSLSTRIGRMSAT-----  
 troutTLR5 VNMT-DFQELNVSLNRMESICEEDLLGFQKHFRLKLNLSLYSMTQYG-----  
 mTLR13 LNLSGTVIKLENLSAKHLQNL RAMDLSNWE---LRHGHLDMKTVCHELLGN-----  
 ratTLR13 LNLSGTVVKLEMLS AKHLQNV RVMDLSNRE---LKHGHLNMKIVCYLLRN-----  
 MdTLR13 LNL SQTCEVEKLD AKHLQNLIELDLSGITP-LPNTKHNLSAVCHLLQN-----  
 XtTLR13 VTFDENSLNISQLLGLVLPNLTEFHWSMR---PALQHELVSACQVFQT-----  
 chTLR21 LHLIGNPLDVFHLLDISDIQPRSLDFSGLV---LGAQG-LDKVCLRLQGP-----  
 XtTLR21 NVAFNGNFDILIFIKNPTVP INRIDYSGLN---LNNSKCLKTMCRYLKG-----  
 fTLR21 LRLRSTKVNIVEFIQNSDIHAGVDFTSHT---LNTEAKLVELCKLKRK-----  
 fTLR23 ITRLFFSHTKVSSRQIQEILQNV---ASLKHLMNYIDEWIREGLLATVCR-----  
 tetTLR23 LTQLHFSQTLVFPFQVQVEILQSA---ASLEHLRMTYIDAWIHHGLLATVCS-----  
 fTLR22 VSLLDISELRRLSLRYMTSLLASVN-SSLTVLRMDKMSCS-LAELINISCS-----  
 tetTLR22 VNTLDISELRRLDLGHVTPLLASLD-ASLTVLRMNQMSCS-LAALINISCS-----  
 halTLR22 VSTLDITGLRMTLVDIRTL LGTVN-SSLSSLRMNAMKNN-ITALTHISCT-----  
 troutTLR22 VKSLNLSGIEMSLERMAMVLTQTVN-SSLVHLRLYDISEERVKALIDFACN-----  
 XtTLR22 LKKNLNKIKENIKPPAIIIGIKNLSCSSLEELNLSYLNLTDSQLIQELCLR-----  
 mTLR12 LDLTRTPLDVAWLKGLGLKLDVL-----YAQ-TATAELAAEAVA-----  
 mTLR11 LILDGTPLKALDLTDSGLLHHLFL-----SLVGTGIEKVPASLTG-----  
 hTLR4 MPLLNLSLDLSLNP MNFIQPGAFKEIRLHKLTLRNNFDSLNV MKTCIQG-----  
 rabbitTLR4 MPLGTLSDLALNPIDFIPPGAFEAIRLHELILKSNFKSTNIMKICIQG-----  
 pigTLR4 VPLHNLSLDLSLNP LNFI EPGAFNKIRLNGLTLRSNFNSSDVMKTCIQG-----  
 mTLR4 NPQVNLSDISLNPIDFIQDQAFQGIKHLHELTLRGNFNSSNIMKTCIQN-----  
 MdTLR4 NP--NLTLDLSENPIQYIHPGAFKGIHLSGLKLRSSFNSTIMEACIKG-----  
 chTLR4 TNRLNLTLVLSLNNIKYIQSGSFAKIHGELILRSSFENLNAMHSSSQG-----  
 XtTLR4 VMKTSLSLILSCNPIHYFSPKAFMDINLHKLQIQGCF SNAESLRSNLKV-----  
 zebTLR4 IG-RNMTLILSRNPLIHIEPGAFKDVILRELHLLAAFISFNQAQKECHKA-----  
 hTLR2 KDFAGLTFLE-ELEIDASDLQSYEPKLSIQNVSHLILHMKQHILLLEIFVDV-----  
 rabbitTLR2 MDFAGVRSLE-ELEIDGSNLQSYEPRLGSI PNVSRVLHLRQPTLLLKLPFDL-----  
 pigTLR2 KDFQGLTFLE-QUEIGASHLQRYPKSLRSIQNISHLILHMRPALLPKIFVDL-----  
 mTLR2 IDFAGLTSLE-NELEIKALSRLRNYQSQSLKSIRD IHHLTLHLSSEAFLEIFADI-----  
 MdTLR2 QDFEGLREL-EDLEIEAAYFQKYE PGLKSIHKINHLALSIRKPNLLPDILVDL-----  
 chTLR2 GNFEFIVFLE-NTLRIDGDNLSQYEPGLKSI RKINHMIISSIRRIDVFSAVIRDL-----  
 XtTLR2 LHFESLERLE-NILEIKAAQGLYEGSLAAIKQINHAVLTVN-IQNRLALLNDF-----  
 fTLR2 GDLAGITHLE-EELTVHANNLRRYESGALATI WPLGRVILSLHGPF LTNDVAST-----  
 halTLR2 AALSGVTELE-ETLTVHANNLSRYESGALS YVWPLGCVTSLHGPF LTNMALASA-----  
 zebTLR2 NGLDVLTHLE-DEMTFFGSLNLSYENGSLKAARPIGSVLSLQNLFESDPVELVSK-----  
 hTLR1 LNISKVL-L----VLGETYGEKEDPEGLQDFNTESLHIVFPTNKEF--HFILDVSVKT--  
 mTLR1 LNISKVL-L----VLGDAYGEKEDPESLRHVSTETLHIVFPSKREF--RFLLDVSVST--  
 hTLR6 LHL SYIL-L----DLRNYI KENETESLQILNAKTLHLVHFPTSLF--AIQVNISVNT--  
 pigTLR6 LHLSCIL-L----DLERYMKENEKESLQILNTEKHLHLVHFHNSFF--SVQVNISVKS--  
 mTLR6 LHLSCIL-L----DLVSHHIKGETESLQIPNTTVLHLVHFHNSLF--SVQVNMSVNA--  
 MdTLR1L LNL SNIL-L----DLERFGGAKDKLETLPVLTNTKQLIIFPPNRAF--FMQLNISVNN--  
 hTLR10 LHLNTVF-----LGFRTLPHYE EGS LPLNTTKLHIVLPMDTNF--WVLLRDGIKT--  
 ratTLR10 LQFSTVF-----IGLNTLSHYE EGS LPLVLTNTVHLIVLPMANF--WVLLCDGMKT--  
 MdTLR10 LHLNTVF-----LGLKHLSSYE EGS LLLNTERLRIVFPEIADY--RFILRDGIHT--  
 chTLR1L1 LQLD TVF-----LTLED FSLYEPLSLTALNTRSLHIVFATNQNFN--FSLLYDGMST--  
 XtTLR1L3 MDLDFVF-----LGIENIEYENGSLQFLNTNKLHINLQPNLSLASSYLLSDALDT--  
 XtTLR1L1 MQLEYVF-----LGMEDL TEYENGSLQFLNTNKLHINLPTNLNLASSYLLSDALNT--  
 XtTLR1L2 LHLKEVF-----IELNSLNDYENGSL LLLNNTKKTLDLFGVLSNEDRYNVLFDVANT--  
 fTLR1 VELRVMS-----LFLEGVLVYEPGSLQDVYARRLQVKFNKFPHD---LMEDALSF--  
 tetTLR1 VELRLLS-----LHLEGKLLYEPGSLKDAYARRLQVELNKEFPLH---LINDALSF--  
 tetTLR14 IRLQEF A-----IKCSSNLMYE EPGSLKVVQTQKLGFDMAIDQRPKALIDMLRDIANKT  
 fTLR14 LRLQEF A-----IKCSSNLMYE EAGSLEVVQTQKLGFDMAIDQRP SALVDMLRDIANKT  
 XtTLR14 ISLQRF S-----LKTMSLWLYEKGAFSDLNTQSLWLDIALDTPNALPRMLKDLGAKA



|            |                                                                 |
|------------|-----------------------------------------------------------------|
| XtTLR14L1  | IGLQKFA-----LKTMSSTLYEEGAFSVLNTHVLFWDIALDTNPQALLLILKDLKGGK      |
| XtTLR14L2  | RSLKKFS-----LKTMSKLGfyEPGALEVLNTRVLWLDISLDTNAQALPLILKDLAGKT     |
| XtTLR14L3  | ISLQKFE-----LKTRSSLRfyQTGAFSVLNTDVLVLMVMTLDTNPKVLPMLKDLAGKS     |
| XtTLR16    | PNITELVLEKNPLILIQNALARFGIHLNLTGFTKLNLEDILNAGVENLKSLS-----       |
| chTLR15    | TSPPAATLRPDLGAPINGLLDLRSTKLSNEELTAKLDADLCQAQLGTVLEFN-----       |
| MdTLR7     | -LSELKILRLHSNSLQHIPKSWFKNT---KKLEELDLSQNFLAKEIGE-----KFLNSL     |
| hTLR7      | -LTELKVLRLHSNSLQHVPPRWFKNI---NKLQELDLSQNFLAKEIGDA-----KFLHFL    |
| chTLR7     | -LKKLRILRLHSNSLQSPSSWFKNI---KNLKNLDLSQNFLIKEIGDA-----EFLKLI     |
| XtTLR7     | -LKNLQVLRRLHSNSLRSIPQWFKNN---RNLQVLDLSENFLASEISTA-----NFLKYI    |
| tetTLR7    | -LTKLKTLMHSNSLTHVAPWFAST---KELRVLDLSSNNLARDIGVT-----VFPNPL      |
| fTLR7      | -LTKLKTLMHSNSLRYVPEWFAST---KELRVLDLSSNNLARDIGVT-----LFPHHL      |
| hTLR8      | -LTQLRYLNLSSSTSLRKINAAWFKNM---PHLKVLDLEFNFLVGEIASG-----AFLTML   |
| pigTLR8    | -LTALRYLNLSSSTSLRRIPATWFENL---HHLKVLHLEFNFLMDEIASG-----NFLAKI   |
| mTLR8      | -LTQLLYLNLSSSTSLRTIPSTWFENL---SNLKEHLHLEFNFLVQEIASG-----AFLTKL  |
| MdTLR8     | -LANLTYLNLSSSTSLRSIPVSWFSNM---PKLKVLHLEFNFLVQEIATG-----GFLTCL   |
| XtTLR8     | -LKNLTELHLSSTSLKTIPTWFQNT---TQLKKLYLERNFLVNEIASA-----DFLLNL     |
| tetTLR8    | -LKNLETLNLGGNSLQHLNPFKLFQPL---SRLKALYLAFNFLKPIIEEG-----AFLNYI   |
| fTLR8      | -LTNLETLNLGGNSLKLNPWFERL---YKQLFLAFNFLKPIIEEG-----AFLKYI        |
| hTLR9      | HLRLEGLVLDKSSLSWLNASWFRGL---GNLRVLDLSENFLYKCIKT-----KAFQGL      |
| pigTLR9    | HLRLEGLVLDKSSLSYLNLDARWFRGL---DRLQVLDLSENFLYDCITKT-----TAFQGL   |
| mTLR9      | HLSHLEGLVLDKSSLSLHLSNFWFQGL---VNLVLDLSENFLYINHT-----NAFQNL      |
| ratTLR9    | HLSHLEGLVLDKSSLSLHLSNKFQGL---VNLVLDLSENFLYINHT-----SAFQNL       |
| MdTLR9     | HLGALEGLVLDKNSLRLDPRWFRNL---VNLTVLDLSENFLSEDITVT-----RAFQNL     |
| fTLR9      | NKSTLTLYLNLRGNSLRTFPKGLFQPL---KNLKMDDLSDNFLSYAIQNG-----TFFAEL   |
| tetTLR9    | NKSSLIFLNLRGNSLRTFPKGLFQPL---KKLAYLDISDNFLSDAIQNG-----SFLAEL    |
| XtTLR9     | CLHKLSYLNLRGNSLHTLHSSLSFSSL---TNLSHLVLDSDNFLN---LETE-----TFFSAL |
| mTLR3      | ----IQNLSLANNQLLATSESTFSGLK-WTNLTQLDLSYNLHDVGNDS-----FSYL       |
| hTLR3      | ----IRNLSLNSQLSTSTNTTFLGLK-WTNLTMLDLSYNLNVVGNDS-----FAWL        |
| mTLR3      | ----VQSLNLSAIQLTKISNMFTFRGLN-QTNLTVLNLSHNGLTSIANDS-----FAWL     |
| chTLR3     | ----IQNLSLSHVLSHINRLTLQGLQ-GTNLTVLNLSKNSLSVIEDDS-----FQWL       |
| XtTLR3     | ----VLNLTLNIRLSKIRNTTFKGLA-DTNLTVLDLSDNSLQIDNDS-----FVSL        |
| fTLR3      | ----ISSLSLRNMKLASLPNTTFAGLQ-QTNLSCLDLNRNGLGKIENG-----FQWL       |
| tetTLR3    | ----ISTLSLRNMKLVTLNMTFRGLN-QTNLSCLDLNRNGLGRIEKG-----FLFL        |
| zebTLR3    | ----LRNLSLKSTEQVTLNNTTFQGLE-KTKITVLDLSENRIKIVDGA-----FQWL       |
| cfishTLR3  | ----LRNLSIQFTQQVMLNNTFKGLG-KTNLTILDLSNNMARITDGA-----FQWF        |
| hTLR5      | ----VDWGGKCMNPFNRNMLEILDVS---GNGWTVDITGNFSN-AISKS-----QAFSLI    |
| mTLR5      | ----VGWETCRNPFGRVRLTDLDS---ENGWTVDIRNFSN-IIQGS-----QISSLI       |
| MdTLR5     | ----VNWKECMNPFKNMSFEILDVS---SNGWTVDIVRDFCH-AIQGT-----RISSLL     |
| XlTLR5     | ----LGSDRCGNPFNRNIRFDTLNLS---GNRFGVSMQKQFSS-ALNGT-----KIIQLK    |
| XtTLR5     | ----LGSDRCGNPFNRNIEFDTLNLS---GTGFDVDMQKQFCG-ALNGT-----KMMQLK    |
| fTLR5      | ----FDWEQCGNPFRIWTFRTDLDS---STGFNLNTRRFLK-AIEGT-----LINHLI      |
| tetTLR5    | ----FDWERCNPFRIHISFGTLDMS---GHGFDLKTLSRFFK-AIQGT-----LIEHLI     |
| troutTLR5  | ----FDWRCNPFNRNMSMETLDS---SNGFDVDMKALFFN-AIQGT-----KIHHLI       |
| mTLR13     | -LPKLETLVFQKNVTNAEGIKQLAKCT---RLLFLDLGQNSDLIYLNND---SEFN---AL   |
| ratTLR13   | -LPMLEILFFHKNATNAEGIKQLAKCT---RLLFLDLGQNSDLVHLNND---SEFN---AL   |
| MdTLR13    | -LPRIETLVFQKNIDSENIKHLANCT---MLVSLDLSHNKDLVHLNND---SEFS---DM    |
| XtTLR13    | -FPKLQLLDIKHSKIIVTNLISIGRCT---NLTSLILS-TSPLPRLQE---KDLQ---DF    |
| chTLR21    | -QALRRLQLQRNGLKVLHCNALQLCP---VLRELDLSDNRLQHVGC---GRLLGKQK       |
| XtTLR21    | -FNINTLYLSGNKIKTLNRGTLDLDCP---LNKTLDLSDNRLKGLGCL---EFMS---K     |
| fTLR21     | -LSRITKTLVGNKIEITLANTLAHCPN---ITKTLDLKSKVQKSDCL---QFLK---EQ     |
| fTLR23     | -IPSLRVLELYLNKVPNLS-AQVEFCS---ELVQLDLSDVSEVPPGFSRL-----M        |
| tetTLR23   | -ISSRLTLELYFNKVENLS-ARLESCE---QLLHLDLSDSDMAGVPPGFSRL-----M      |
| fTLR22     | -IPTMSALQLQNNKLSINSVFFHLCT---NVKDLDLQRNQINSTDEGAFFS-----M       |
| tetTLR22   | -IPTMLKLQLGRNRLRSVSSSMFHLCS---NVTELNLQMNQIDSVDKRTFRS-----M      |
| halTLR22   | -IPTLSTLQLRHKNLTYVSSDLFKLCF---NIREIDLTDNKIKKIRDDAFSS-----L      |
| troutTLR22 | -IPTLSLLRLHNNISALSEEFLQSCK---QVTEVDLENNNIIQLSEVSFRS-----M       |
| XtTLR22    | -HPKVQTLKLTGNQYTEFEDTFQNTCT---SVKVLDSLHNRHLSAPGSTFHH-----L      |
| mTLR12     | -HFELQGLIVKESKIGSIS-QEALASCH---SLKTLGLSSTGLTKLPPGFLTA-----M     |
| mTLR11     | -YSELRALDLGKNQIQNILENGEIPGYK---ALEFLSLHDNHLQTLPTFRFLHT-----L    |
| hTLR4      | -----LAGLEVHRLVLGFEFRNEG-----NLEKFDKSALEGL-----                 |
| rabbitTLR4 | -----LSGLEVHRLVLGFEFKNER-----NMKNFDKSALEGL-----                 |
| pigTLR4    | -----LAGSKVNLVLGFEFKNER-----NLESFVKVLEEL-----                   |
| mTLR4      | -----LAGLHVHRLVLGFEFKDER-----NLEIFEPSIMEGL-----                 |
| MdTLR4     | -----MTGLKVGKVLVGNKYNDI-----QMTSFESSILDGL-----                  |
| chTLR4     | -----LAGLQVNRLVGEFTNIL-----KITAFQNGLLSGL-----                   |
| XtTLR4     | -----LSGSKIEKLEIGDYRSSA-----VKISFQEGMEGL-----                   |
| zebTLR4    | -----LTGLTVDKLVFGRYRMDL-----KIKVSVDPYLDGL-----                  |
| hTLR2      | -----TSSVECLELR---DTDLDTFHFSELSTGETN-----                       |
| rabbitTLR2 | -----LSSVECLELR---ETDLEDFRFSGLSVTEPN-----                       |
| pigTLR2    | -----LSSLEYLELR---NTDFSTFNFSVDSINEHC-----                       |

mTLR2 -----LSSVRYLELR---DTNLARFQFSPLPVDEVS-----  
MdTLR2 -----ASSLQYLEFR---KTNLGEFNFS-MPPNTPS-----  
chTLR2 -----LHSAIWLEVR---EIKLDIENEKLVQNSTLP-----  
XtTLR2 -----VHSVTLLEMK---DMQFGDAADV KAMVILND-----  
fTLR2 -----MLGDVSYPETPMILRDLNLTWIQSVHNLRVAAR-----  
halTLR2 -----VLRDVSYPETPIVLEDLHLIGNRSTQPLRELAK-----  
zebTLR2 -----VLQDVSHPETLLI IKDVTMKTNTSTEPFKMVKE-----  
hTLR1 -----VANLELSNIKCVLEDNKCSYFLSILAKLQTN-----  
mTLR1 -----TIGLELSNIKCVLEDQGCSYFLRALS KLKGN-----  
hTLR6 -----LGCLQLTNIK--LNDNDCQVFIKFLSELTRG-----  
pigTLR6 -----VGCLQLANIK--LGDDNCQVFI TFLELQTG-----  
mTLR6 -----LGHLQLSNIK--LNDENCQRLMTFLESELTRG-----  
MdTLR1L -----LRSLQITNIN--LNNDKCSVTFDFLSKVIHN-----  
hTLR10 -----SKILEMTNIDGKSQFVSYEMQRNLSLEN-----  
ratTLR10 -----SKVEMSNIGGKSQFVSYETPRTL SVEN-----  
MdTLR10 -----SKILEMANIN-MNQFTNHDNQNPLLEKPKG-----  
chTLR1L1 -----SEKLIKIVNLR---YTL SHKDFSPSLELQKK-----  
XtTLR1L3 -----SMTLEVSGAQ---CDVHCDYFTKSFFTINKN-----  
XtTLR1L1 -----STLEVSGAQ---CDVHCDYFTKSFFTITKN-----  
XtTLR1L2 -----TSVLELSHLQR--WNIHID-PKKYIFNIVQN-----  
fTLR1 -----FPEVELLELSRGYQELSKQLSQRSEIY-----  
tetTLR1 -----FPEVELLKLPEGCRELSRQLSQR AEIY-----  
tetTLR14 -----FIAIQIRNLFEMYYTGEQDIFQGLQVR-----  
fTLR14 -----FIAIQFRNLF EFRYYTRVQDIFQGLKHVA-----  
XtTLR14 -----FSSLRFRNLF EFTYYTDAMDVFFGLADIF-----  
XtTLR14L1 -----FDVLRFRNLF EITYYTDTVDIFSWLPSIS-----  
XtTLR14L2 -----IDSLRFRRLFESSYYTDTMDLFCGLVDIN-----  
XtTLR14L3 -----LDILSFGNLF EHNYYAGPTNPFSSLPDIN-----  
XtTLR16 -----LTSACRRAINKTHTLCSIAQR FQLKSL SAPVNRFSGIYTKDFLG-----C  
chTLR15 -----ISHSDLEMDLLSLF ILFLPMKDIQSV DASYNRITINN-----

MdTLR7 VNLKDLDFSNYEPQVYRAYLNLNNTFASLKNLKI LRKGYVFKELQSTHLFYLK-NLSQ  
hTLR7 PSLIQDLDFSNFELQVYRASMNLSQAFSSLSKILRIRGYVFKELKSFNLSPLH-NLQN  
chTLR7 PSLVELDLSFNLFQVYSPFNLSKTFSCLSNLETLR IKGYVFKELIAENLDP LL-NLRN  
XtTLR7 PSLKSLDLSFNLFQVYSDKLSSIFSSLASLETLRIRGYVFNQNKNNLMPLV-HLPN  
tetTLR7 CKLQELDLSFNELQKYPQTLRLSHTFESLRSLKILRLQG FVFQQLRPKSITPLK-HLTN  
fTLR7 GKLQELDLSFNELQRYPRTLRLS CSFSLNSLRILRLQG FVFQQLKPE SITPLK-SLTN  
hTLR8 PRLEILDLSFN YIKGSYPQHINLSRNF SKLLSLRALHLRGYV FQELREDDFQPLN  
pigTLR8 PSLEILDLSFN YEQKKYPQYINISHYFANLTSLQILHLRAYV FQELRKEDFQPLR-NLLH  
mTLR8 PSLQILDLSFN FQYKEYLQFINISSNF SKLRSLKHLHLRGYV FRELK KKHFEHLQ-SLPN  
MdTLR8 RNLEILDLSFN YLKNQYFPYITLSSNF SKLDSLKVLHIRGYV FQELRKKDFQSLM-KLPK  
XtTLR8 PFLEVDLSFN YDLRSYTPNINLSRNF SKLVSLKELHIQGYV FKHIAENLAPLL-NLSK  
tetTLR8 SSVRKIDLSFN YNLKSYPETINLSSNF SNLRALKTLHLEGLVFRNIGPDTLRPLY-QLKN  
fTLR8 PNIKKMDLSFN YNLRSPK TINLSPEFSNLAALQTLHLEGLVFNIGPDTLRPLY-QLKN  
hTLR9 TQLRKLNL SFNYQKRVSFAHLSLAPSF GSLVALKELDMHGIFFRSLDETTLRPLA-RLPM  
pigTLR9 ARLRKLNLSFN YHKKVSFAHLHLASSFKNLVSLQELNMNGIFFRSLNKYTLRWLA-DLPK  
mTLR9 TRLRKLNL SFNYCKKVSFA RLHLASSFKSLVSLQELNMNGIFFRLLNKNTLRWLA-GLPK  
MdTLR9 TKLKKLNLSFN YHKKVSFA YLHLAPSFQNL TALQVLDMSGIFFRSLTQATLQPLL-GLPH  
fTLR9 TSLAWISLIYNYEPLKMPPELPHLSRPHIGDISGLQYLLSGNFFHSLSGQSFEVLS-KLRN  
tetTLR9 TSLSWISLIYNYEPLKTLPRLSLSPHIGTISGLQHLLSGNFFHFSFSQSFEVLY-KLQK  
XtTLR9 TNVKELNLDFNFKPYSMYERLVLNSNVARMKSLERITIVGYFFNVLDEEGIMPLL-SLPN  
mTLR3 PSLRYLSLEYNNIQRLSPRSFYGLSNLRYLSLKRAFTKQSVSLASHPNIDDFSFQ-WLKY  
hTLR3 PQLEYFFLEYNNIQHLSHSLHGLFNVRYLNLKRSFTKQSI SLASLPKIDDFSFQ-WLKC  
MdTLR3 SHLEWLVLENNIDHLFSR SFYGLSNV KYLNLKRSFFKPKNSKISFPKIDDFSFQ-WLKC  
chTLR3 SKLEYLNLENNI INVSSHLFYGLSSITHLNLINSLTG-----KIEDFSFQ-WLHH  
XtTLR3 GALEILNLENNI DSHVNPKTFNGLSKVRVNLNRKSLSSN-----LKLDDLSFQ-SLHN  
fTLR3 PRLETLILEENNIKHLTRDTFQGLSLKTLQTKALVKG--HTSATPIIDNFSFQ-PLTT  
tetTLR3 PRLQTLILEENNIKHLTSDTFQGLHSLKSLQTKALVKG--HTSANPIDDFSFQ-PLKA  
zebTLR3 PQLEFLSLEHNTIRHLTND SFGSLGNLRQLNLRKALIKS--HAS-LPVIDDFSFQ-HLVQ  
fishTLR3 PMLEYLSLEHNNLKH LTKGTFGLKSLRKLNLQSALAKG--HASLPVIDDFSFQ-PLVK  
hTLR5 LAHHIMGAGFGFHNIKDPDQNTFAG----LARSSVRLDLSHG FVFSLNSRVFE-TLKD  
mTLR5 LKHHIMGPGFGFQNI RDPDQSTFAS----LARSSVLQDL SHGFIFSLNPRLFG-TLKD  
MdTLR5 LNYHIMGGGFGFHNLK EPDQDTFAA----LGMSSVIKMDISHG FIFSLNFHLFE-TLRE  
XtTLR5 LCHHIMGPGFGYNNFKDPDNRFTVG----LVNSDLEILDLSKGSIFSMQPYTYG-NLTI  
XtTLR5 LD SHGMGAGFGYNNIKDPDNTSTFVG----LVNSNLQILDSTGNIFSLKPYTFG-NLTV  
fTLR5 ISS-NMGKGF SHNNLPDDEDTFEG----LVSSGIHTMDLSRNWIYVLKSAVFR-PLRN  
tetTLR5 LHG-HMGRDFSYANLPDEEETFQG----LGSSGIQTLDSLGNRIFALNRAVFQ-PLGN  
troutTLR5 LEHSTMGKSF GFSNVKDPDRQTFEG----LENSSVKILDLSKCFIFTLQYAVFS-PLRE  
mTLR13 PSLQKLNLNK CQLS-----FINNRTWSS-LQNL TSLDLSHNKFKSFPDFAFS-PLKH  
ratTLR13 PSLQRLNLNK CQLS-----FISNKTWSS-LQNL TILDLSHNKFKSFPDFAFS-PLKR

MdTLR13 PSLERLDLNSCMLS-----LVSNMTWDS-LQNLTVLDSLNRNLKTFPDFAFA-PLRR  
XtTLR13 KYLEVLVLDKCKLR-----RIANSSWRG-LNNLHTLILERNQLSDLEDKLFS-PLTS  
chTLR21 EKLEVLTVLVEHNLLK-----KLPSCLGAQVLPRLYNI SFRFNRI LTVGFPQAF A-YAPA  
XtTLR21 TNVENLIVEHNLLK-----ELINCSKSKSHFPRLRHISFRYNRIWI VKGNAFH-FAPN  
fTLR21 RQITTFIAEHNHYS-----SLPTCEDEDPFRQLEELRYRYNRILSVNSHAFH-HTPN  
fTLR23 KQLRLLNLEVNLLT-----KVP--EDIRNISSLQVLYLSDNLITEVGCCEEFS-NTSA  
tetTLR23 QQLKLLNLEVNLLT-----RVP--EDIRSLSSLQVNLKDNRI SELGCEDFS-NTSA  
fTLR22 KELKVLTLSDNRLQ-----SVP--VATRNLPLNMKLDLSDKNKINALHCCDDFA-NITK  
tetTLR22 PQLTVLSLNNNLS-----SVP--AATRNLPALMELDLSDKNRIQAVRCGDDFA-NLTS  
halTLR22 QSLKTLSLSRNKL S-----SVP--YATRNLPSLGELDLSDFNNTIKLGCDDFA-NQTK  
troutTLR22 EQLSTLRLGHNRLS-----SVP--DATRNISTLMLLDLSDFNIIHKLGCSDFS-NLFG  
XtTLR22 ASIRELSLANNLSL T-----AIP--DNFSFITSLQKLNLSYNHVKEVNLNDS---FSN  
mTLR12 PRLQRLELSGNQLQS-----AVLCMNETGDVSGLTTLDLSDGNRLRILPAAAFS-CLPH  
mTLR11 PQLQKLNLSMNKLG-----PILEPEGLFSTNLKVLDLSDYNQLCDVPHGALS-LLSQ  
hTLR4 CNLTIEEFRLAYL---DYYL---DDIIDLFNCLTNVSSFSLVSVTI ERVKDFS---YFNG  
rabbitTLR4 CNLAIIEEFRLAYI---DDLE---GNITDLFDCLENVSMALVHMYIDNQEIFP---KDFS  
pigTLR4 CNLTLEQFRLAHF---GEFP---DDVSDLFNCLANASVILLSLNLHGLEALP---NDFR  
mTLR4 CDVTIDEFRLTHT---NDFS---DDIVK-FHCLANVSAMSLAGVSIKYLEDPV---KHFK  
MdTLR4 CEVDIGEFRMVQP---SQFP---SDVNGVFKCLVNVSVLFLVNTDIDQLTNLP---IFPK  
chTLR4 CQVQMQEFVLMCF---REFD---NDTDTLFDICGNVTTIRLVLDNLETLSEVP---MFSQ  
XtTLR4 CRADIQELS INGMYPAR-----DTPLDVCVKYSTSLCVVNNNLELDNI IQSNEIFDR  
zebTLR4 CSINFNEIYLVQK-----EWS---DSEMHLFRCMVNATKITIKKAYMNSMKHIP----FHR  
hTLR2 --SLIKKFFFRNVKITDESCEILKLLAYVPELLEDLEFDDCTLNGVGDVEFPDRDLSQDL  
rabbitTLR2 --PRITRFIFRSVKITDESCEILKLLAYVPELLEDLEFDDCTLNGVGDVEFPDRDLSQDL  
pigTLR2 --TVMKKFFFRKAEITDASFEIVKLLNVVSGALEVEFDDCTLNGRGDLSTALDTIKSL  
mTLR2 --SPMKKLAFRGSLVLTDESFNELKLLRYILELSEVEFDDCTLNGLGFNPSESDVSEL  
MdTLR2 --PLIEKII LREVIVTDKSFIDILKMFSYASELLEIVLEDCILNGLGWEEFDISEIHHE  
chTLR2 --LTIQKLTFTGASFTDKYISQIAVLLKEIRSLRELEAIDCVLEGGKAWDMTEIARSKQ-  
XtTLR2 --TSIKYLVFRNCIITDQASRLLEIFQTYRNITDFILDDSTLYGTGTASPVIGD---DP  
fTLR2 --RRIRHLSFQNLSDMATVEFLVVFVDFGVP-LTHISVEGVTLKGVGRWEKANKT---EH  
halTLR2 --RRVRNMTFRNLSVSDEATVSVIEILDGVP-LTYFSDIDGVTLTGEGRWEKASWA---DF  
zebTLR2 --GGTKSLTFQNSSTTDQALTSFLEFMDGSP-LSFIGLEDIQFVGIGEWQKAKYT---HH  
hTLR1 --PKLSNLTLNNIETTWSFIRILQLVWHTT-VWYFSDISNVKLGQQLDFRD-----FDY  
mTLR1 --LKLSNLTLNNEVETTWSFINILQIVWHTP-VKYFSDISNVKLGQQLAFRM-----FNY  
hTLR6 --STLLNFTLNHIETTWTWKLRFVQFLWPKP-VEYLNINLTIIESIREED-----FTY  
pigTLR6 --PTLLNFTLNHVETTWTWKLGVIFQFLWPKP-VEYLSIYNLTIVESIDEED-----FIY  
mTLR6 --PTLLNVTLQHIETTWKCSVKLFQFFWPRP-VEYLNINLTIETITERIDREE-----FTY  
MdTLR10 --SKSLNLTLYHIEDTWKCFVEILQFLWPKP-IEYLYIYNLTLVGKIGFEL-----FTY  
hTLR10 --AKTSVLLLNKVDLLWDDLFLILQFVWHTS-VEHFQIRNVTFGG-----KAYLDHNSFDY  
ratTLR10 --TKASTLIFHKVDLLWDDLHVQFVWRTS-VECFQIQDLTFGG---MASRDHSSFDY  
MdTLR10 --SKTSHLLLSNVYGPWQEFLQALQFVWHTS-IQQLQIQNFTLGA---QSEFKTKIFDY  
chTLR1L1 --IKTTDLTLDTVDLEWTVILQIFLLVWDS-VEHLTVRNLI FRGPVVELTEYKHVPLLR  
XtTLR1L3 --SKVVNLIISNSTMPGNEMLKIIPPIWDS-VEHLHIKMFRLIKEFKYVK-----MDF  
XtTLR1L1 --SKVVNLIISNGAMPNEIFKIMPPIDWDS-IEHLYIKIFRLQNELKYVK-----MDF  
XtTLR1L2 --SKVTDLTMRHVNVWVKMIVLALQYIWHSS-VETLTFYDFSLKGLIAKTS-----FDY  
fTLR1 ----TSCLYLTHISINWPDFTQYVHVVALNNT-VTHLGVSGVTMYRLPQNT-----PV  
tetTLR1 ----TSRFLTNVSNWDFTRCVHTVALNNT-VSHLSVSDVTLHRLPQTD-----PM  
tetTLR14 ----AYQLIFHRGKFENLRLMALLNLK--AIKRLRFQYIDFARSPTFVDNG-----  
fTLR14 ----AYQLIFHRGKFENLRLMALLNLE--AIKRLRFQYIDFARSPTFVDNR-----  
XtTLR14 ----IKELTFYRGKFENLRLTLKNVEKSNIQDLFLLSIDFARS--LSTNR-----  
XtTLR14L1 ----TRELVFYRGKFENLRLMIMLENIQRSSILDLSLSDVDFSR--HSANK-----  
XtTLR14L2 ----IRELIFFRGMFTENLRLHQAHSIQKSTIQDLLLLSVKFDRS--LNTNN-----  
XtTLR14L3 ----VRELIFNRGKVNQKLLQLILETIQTSSIQDLSLSDVDFDYS--DVRTT-----  
XtTLR16 SSLEFLNLNHNHIIHIVDPDLYTLPKLKLHLSYSLHMMNLCP LSYQDNFTSS-----  
chTLR15 IDVEAICHFFPFSNFSFLNI SNNPINSLETVCLPESITVIDLSFTNISTIPANFAK-KLSK

MdTLR7 LEVLDLGT---NFIKIADLSVFKNFPA-LKNIDLSVNIKISPR--ESSQNGFCS-----  
hTLR7 LEVLDLGT---NFIKIANLSMFKQFKR-LKVIDLSVNIKISPSG-DSSEVGFC-----  
chTLR7 LTVLDLGT---NFIKIADLRVFKKFRS-LKIIDLSMNIKISPSGEGNFYGFCS-----  
XtTLR7 LTLDDLST---NFIKVADSLFPKFKS-LQTIILSNNKISPSG--EANDSCS-----  
tetTLR7 LEVLDLGT---NFIKMTNLSILMELKS-FKIINLSNNKISSPSDQEPVGLSGGQSWEW  
fTLR7 LEVLDLGT---NFIKMTNLSILMELKS-FKIINLSNNKISSPSDQAAVGFSGGQAWEW  
hTLR8 LSTINLGI---NFIKQIDFKLFQNFNS-LEIIYLSENRISPLVKDTRQS-----Y  
pigTLR8 LKFINLGI---NFIKQIDFTIFSEFSN-LSIIYLSENRISPLVNNTGQK-----N  
mTLR8 LATINLGI---NFIEKIDFKAFQNFSS-LDVIYLSGNRIASVLDGT-----F  
MdTLR8 LQIINLGV---NFISRINLTLFKDFRN-LTVIYLSENRISPPVTGKYLS-----F  
XtTLR8 LKILNLGT---NFIRQVDFKIFQQFTG-LELIYLSENRITPFSEKNN-----  
tetTLR8 LSVLNLGT---NFIIIRADSSIFKKLSH-LKMIYLGENRILYPIEQNP-----  
fTLR8 LSVLNLGT---NFIIQADSSIFKKLSH-LKMIYLGENRILYPIEQNM-----  
hTLR9 LQTLRLQM---NFINQAQLGIFRAFPG-LRYVDLSDNRISGASELT---ATM-GEADG  
pigTLR9 LQTLRLQM---NFINQAQLSIFGAFPG-LLYVDLSDNRISGAARPV---AIT-REVDG

|            |              |                 |          |             |          |          |             |                         |
|------------|--------------|-----------------|----------|-------------|----------|----------|-------------|-------------------------|
| mTLR9      | LHTLHLQM---- | NFINQAQLSIFGTFR | A        | LRFVDLS     | SDNR     | ISGPSTLS | ----        | EATPEEADD               |
| ratTLR9    | LHTLHLQM---- | NFINQAQLSVFSTFR | A        | LRFVDLS     | SNR      | ISGPPTLS | ----        | RVAPEKADE               |
| MdTLR9     | FQKLLLP      | ----            | NFISKADL | GIFGLFHS    | ----     | LQFVDLS  | DNKVTGGSN   | AGRVNGALLEEGAS          |
| fTLR9      | LKKLELRM     | ----            | NFIDNINM | KALHQVPS    | ----     | LVHIDLS  | QNRLSFIPQCS | VSPAERESHNNQN           |
| tetTLR9    | LTRLELRM     | ----            | NFINTFDL | KALKRVPS    | ----     | LTSINLS  | QNLISVFS    | DCPISSAEREICHNQS        |
| XtTLR9     | LREISLRT     | ----            | NFILKVN  | LSMLFTHKP   | ----     | LRFISLS  | ENLISFE     | -----EHKHGQK            |
| mTLR3      | LEYLNMD      | ----            | NNIPSTK  | SNTFTGLVS   | ----     | LKYL     | SLSKT       | -FTSLQTLTNET            |
| hTLR3      | LEHLNMD      | ----            | NDIPGIK  | SNMFTGLIN   | ----     | LKYL     | SLSNS       | -FTSLRTLTNET            |
| MdTLR3     | LEYLSMED     | ----            | NSFSGIT  | TNMFTGLTN   | ----     | LKSIN    | LSSS        | -FANLQILTNTT            |
| chTLR3     | LEYLIMDN     | ----            | NNFPRI   | TNMFTGLKN   | ----     | LKYL     | SLYNC       | -NTNLQRITNKT            |
| XtTLR3     | VQYLNMEA     | ----            | NKMIAT   | EHTFGLTS    | ----     | LTNL     | SLSDS       | -TLQQHTLTNRT            |
| fTLR3      | LESVLVQK     | ----            | TAIREIT  | TQTFTGLTS   | ----     | LKELD    | LSWSS       | CLSLKTITNET             |
| tetTLR3    | LESVLVQK     | ----            | TAIWKIT  | PQFTFTGLTS  | ----     | LMELD    | LSWSS       | CVSLKNITNQT             |
| zebTLR3    | LEYLCMAN     | ----            | TAFREL   | TEQIFSGLRN  | ----     | LKTL     | DLSWS       | -ITGIKTVTNKT            |
| cfishTLR3  | LEYLYMEK     | ----            | TSFREI   | TENIFYGLPC  | ----     | LREL     | NLGS        | -STGLKIVSNTT            |
| hTLR5      | LKVLNLAY     | ----            | NKINKI   | ADEAFYGLDN  | ----     | LQVL     | NLSYNLL     | GELYSSNFYG              |
| mTLR5      | LKMLNLAF     | ----            | NKINKI   | GNAFYGLDS   | ----     | LQVL     | NLSYNLL     | GELYNSNFYG              |
| MdTLR5     | LKVMNLSH     | ----            | NKVNKI   | ANGAFYGLDN  | ----     | LQIL     | NLSYNLL     | GELYQSDFAG              |
| X1TLR5     | LKVLNLAE     | ----            | NKINRI   | EKDAFYGLNS  | ----     | LINL     | NLAHNL      | LGELYDYSFNS             |
| XtTLR5     | LKLLNLAE     | ----            | NKINRI   | ENKAFCLNS   | ----     | LITL     | NLSYNLL     | GELYDYSFEG              |
| fTLR5      | VVILDVSR     | ----            | NKVSQI   | QTSAFNGLQ   | GLRLLNLS | FNLLGE   | IYAD        | TFGS                    |
| tetTLR5    | MRIIDL       | SR              | ----     | NKINQI      | ETRAFDGL | QADLRL   | LLNLS       | NLLGEIYAHTFSS           |
| troutTLR5  | VEDITIAQ     | ----            | NKINQI   | DREAFGLQ    | ----     | VQKL     | NLSHNL      | IGEIYSYTFDN             |
| mTLR13     | LEFLSLSR     | ----            | NPITEL   | NNLAFSGLFA  | ----     | LKEL     | NLAACW      | IVTIDRYSFTQ             |
| ratTLR13   | LEFLSLSR     | ----            | NPITEL   | NNLAFSGLFS  | ----     | LKEL     | NLAACW      | IVTIDRYSFTQ             |
| MdTLR13    | LQSLSLSR     | ----            | NPITEL   | NNLSFYRLHE  | ----     | LKEL     | NLAGCW      | IVTIDRYSFTQ             |
| XtTLR13    | LQYLDLSK     | ----            | NYLTHL   | NEKAFSGLRR  | ----     | LNYS     | SLKGC       | ITAATRNNFRY             |
| chTLR21    | LQVLWLN      | ----            | NSLVWL   | DRQALWRLHN  | ----     | LTEL     | RDLN        | LLTDLYHNSFID            |
| XtTLR21    | LQTLYLN      | ----            | NNIVFL   | ERYFSGLGK   | ----     | LREL     | RDLN        | LLTDLYENSFAN            |
| fTLR21     | LKTLWLN      | ----            | NTIAFL   | HQKALSGLRQ  | ----     | LSTL     | RDLN        | LLSDLFADTFED            |
| fTLR23     | LVELYLD      | ----            | NRITSL   | QCSFENLLK   | ----     | LRIL     | DLN         | NNLLWKIEGVFSRG          |
| tetTLR23   | LVELQLSS     | ----            | NRISLD   | QCIFRRMVS   | ----     | LRVL     | DLGH        | NLLWMDVGVFSLG           |
| fTLR22     | LRHLKLNA     | ----            | NLISAL   | PCVFKVTK    | ----     | LEV      | LKLQ        | NNNISQLNTAFKMY          |
| tetTLR22   | LRQLNLYA     | ----            | NSISAL   | SHCVFKDLTQ  | ----     | LRVL     | LKLQ        | NNNISKLSGAFQLY          |
| halTLR22   | LRRLRLYH     | ----            | NSIASL   | AECVFKDLVQ  | ----     | LQVL     | LKLQ        | NNHLSNNGAFRDC           |
| troutTLR22 | LTQLFLFH     | ----            | NQISNL   | PGCVFQDLKD  | ----     | LRIL     | KLGS        | SNKILTLNDDFMSG          |
| XtTLR22    | LKELDLSG     | ----            | NKMTFF   | LSSGLGNWN   | ----     | LQDL     | NLRE        | NLYLLDISASFSS           |
| mTLR12     | LRELLRY      | ----            | NQLLSL   | EGYLFQELQ   | ----     | LET      | LKLD        | GNPLHLGKNWLA            |
| mTLR11     | LQELWLSG     | ----            | NNISLS   | NEASFGLRQ   | ----     | LRTL     | DLSW        | NQIKVLPKPGWLSH          |
| hTLR4      | WQHLELVN     | ----            | CKFGQ    | ----        | FPTL     | KLKS     | ----        | LKRLTFTSNKGGNAFSEVDLPS  |
| rabbitTLR4 | WKSLEFIN     | ----            | CEFSEN   | ----        | IFFL     | KLSS     | ----        | LRRLIFTANKGVRTFPELNTPS  |
| pigTLR4    | WQHLEVVN     | ----            | CKLQ     | ----        | FPAL     | KFNS     | ----        | LKKFVFKDNKHMHTFTEINLNP  |
| mTLR4      | WQSLSIIR     | ----            | CQLK     | ----        | FPTL     | DLPF     | ----        | LKSLTTLTMNKGSISFKKVALPS |
| MdTLR4     | LFSLSLTD     | ----            | CNFDIM   | PDLPISLPS   | ----     | LKEL     | KVTH        | HKDLTTLSDLALPN          |
| chTLR4     | VKHLEWKK     | ----            | CKFQEL   | PAEKLSLFE   | ----     | LRVL     | RITK        | SKDLNGFEQKFGSLT         |
| XtTLR4     | LQSVYIKN     | ----            | CTLNIP   | PSLFLSKPCS  | ----     | LREV     | RITGI       | QKLSNFNRELTLGR          |
| zebTLR4    | LKELYLSD     | ----            | TGLSVV   | P--FISHIPS  | ----     | LEKL     | VMKSP       | FPITFTTGVSDLPLP         |
| hTLR2      | GKVETLT      | ----            | IRRLHI   | PRFYLFYDLS  | ----     | TLYS     | LTER        | VERK                    |
| rabbitTLR2 | GKVETLT      | ----            | IRRLHI   | PKFYLFYDLS  | ----     | TIYS     | LSE         | SERVK                   |
| pigTLR2    | GNVETLT      | ----            | VRRLHI   | PQFFLYFYDLR | ----     | SIYS     | L           | TGAVK                   |
| mTLR2      | GKVETVT      | ----            | IRRLHI   | PQFYLFYDLS  | ----     | TVYS     | LLE         | KEVK                    |
| MdTLR2     | VKVETII      | ----            | IRRLI    | GNFFLFRDLS  | ----     | PVYS     | L           | LQGIK                   |
| chTLR2     | SSIETLS      | ----            | ITNMTI   | LDFYLFDDLE  | ----     | GIET     | Q           | VGKLL                   |
| XtTLR2     | FSVTTAI      | ----            | INKLHI   | PKFFLFSDLQ  | ----     | GIYK     | L           | SNFK                    |
| fTLR2      | KGIDEIF      | ----            | VRDVEV   | LDIYKFASLI  | ----     | SCGF     | L           | LQYPR                   |
| halTLR2    | HSIDEFF      | ----            | IQNIVV   | LVDVFKFVSSL | ----     | RLK      | F           | LQYPR                   |
| zebTLR2    | DSLRTAY      | ----            | LRNIEI   | EGFFGFSSMI  | ----     | ELG      | F           | LKHFFH                  |
| hTLR1      | SG-TSLKA     | ----            | LSIHQV   | VSDVFGFPQS  | ----     | YIYE     | I           | FSNMN                   |
| mTLR1      | SD-TSLKA     | ----            | LSIHQV   | VDVFSFPQS   | ----     | YIYS     | I           | FANMN                   |
| hTLR6      | SK-TTLKA     | ----            | LTIEHI   | TNQVFLFSQT  | ----     | ALYT     | V           | FSEMN                   |
| pigTLR6    | YE-TTLKG     | ----            | VKIEHI   | TKRVFIFSQT  | ----     | ALYR     | V           | FSDMN                   |
| mTLR6      | SE-TALKS     | ----            | LMIEHV   | KNQVFLFSKE  | ----     | ALYS     | V           | FAEMN                   |
| MdTLR1L    | NE-TLLKG     | ----            | LKIEFI   | NKVIYIFLQS  | ----     | NIYNI    | F           | SNMN                    |
| hTLR10     | SN-TVMRT     | ----            | IKLEHV   | HFRVFIYIQD  | ----     | KIY      | L           | LTKMD                   |
| ratTLR10   | SN-TVMKA     | ----            | VILESI   | HFRIFFIYIQD | ----     | KIY      | L           | LTKMD                   |
| MdTLR10    | SN-TSMKV     | ----            | IKVEHV   | SIKIYSFPQD  | ----     | RIY      | L           | LTKMG                   |
| chTLR1L1   | SLGSSMKA     | ----            | LTLERV   | RNKLYYFNQE  | ----     | ILYR     | Q           | FSEMN                   |
| XtTLR1L3   | TH-HSIKS     | ----            | FTLEYF   | TNDVFFFQGT  | ----     | HPFN     | I           | FAEML                   |
| XtTLR1L1   | LH-HSIKS     | ----            | LTVEDL   | TNEVVSFRDT  | ----     | HPLQ     | M           | FAEML                   |
| XtTLR1L2   | SN-TSVKA     | ----            | VNVQGV   | NVGVFQFDQS  | ----     | SVYR     | V           | FSDMN                   |
| fTLR1      | AETSRVKS     | ----            | LTFRRA   | VRSFLFSQE   | ----     | AVYN     | F           | FINMP                   |
| tetTLR1    | ANTSrvKS     | ----            | VTVREV   | TVKSFLFSQE  | ----     | AVYN     | F           | FINMP                   |

tetTLR14 -EASSITN----LDLDKLDLWYISNPDVLRFDWRFTWFN-----  
 fTLR14 -AGSSITD----LVLDKLDLWYISNPDVLRFDWRFTWFN-----  
 XtTLR14 -TDIRIND----LALRRLVIKDVTPDILRFDWTFWFN-----  
 XtTLR14L1 -TNVSIDD----LRLRTLVRKDVTPDILRFDWTFWFN-----  
 XtTLR14L2 -THILFDR----LYLNSLVIIRDIAAGPHIFKYDWTFTWFN-----  
 XtTLR14L3 -VDVKMDN----LFLRSLVIKDATNPDIILTFDQTFTWFN-----  
 XtTLR16 VEALYFIG---NRITVLKKNQFFCMTK-LTDLLLARNGIEHIEESAFWG-----  
 chTLR15 LERMYVQGNQLIYTVRPNPSPATPRPPPGTVQISAISLVRNQAGTPIESLP-----

MdTLR7 WARTSTEFQT--SFENIHFRYDEFARRCKFKSKEE--PFLPLLRNDCESYG-ELDLSRN  
 hTLR7 NARTSVESYEPQVLEQLHYFRYDKYARSCRFKNKEA--SFMSVN-ESCYKYGQTLDLNLSKN  
 chTLR7 DHRITVEQYSRHVLQEMHYFRYDEYGRSCKSKDKEAD-SYQPLVNGDCMSYGETLNLNLSRN  
 XtTLR7 ASQVSSGHYIGRTFQEVHYFEYDENARKCKAKDKENF-TFKLFLNESQAYGQSLDLSQN  
 tetTLR7 SPMLAADQYQNDQVREIHFRYDEYARSCYKDKELG-VIASFVKKECSQFGKTLDVSRN  
 fTLR7 SPMLPADQYQNEEVREIHFRYDEYARSCYKDKELG-VIASFVKRECSQFGKTLDVSRN  
 hTLR8 ANSSSFQRHIRK-RRST-DFEFDPHSNFYHFTRP-----LIKQPQCAAYGKALDLSLN  
 pigTLR8 GDRPSFQSHVLK-PRSA-TPKFDPHSNFYHNTKP-----LIKQPQCSRYGKALDLSLN  
 mTLR8 -DYSSWRNRLRK-PLSTDDDEFDPHVNFYHSTKP-----LIKQPCTAYGKALDLSLN  
 MdTLR8 AHHAIHPRSVDTDNEPLARGI IDPHKNFYHYSRP-----LVKPECSSYKALDLSLN  
 XtTLR8 -KMKLVEGYEDKHSRVSSPGVSFPTQFNFQMTKTFN-----EVVVKPQCSSRGKTLDLSLN  
 tetTLR8 -QVPNVWYTQRSDFSNSQYRNSHGEDFKFRIAHT-----LIKQECFDAGKVLNLSN  
 fTLR8 -PSLSRQYNQRLDFSVSSYMKPHGRDYFFKISQT-----LIKQECFDAGKVLNLSN  
 hTLR9 GEKVWLQPGDLAPAPVDTPSSED-----FRPNCSTLNFTLNLNLSRN  
 pigTLR9 RERVWLP SRNLAPRPLDTLRSED-----FMPNCKAFSFTLNLNLSRN  
 mTLR9 AEQEELLSADPHAPLSTPASKN-----FMDRCKNFKFTMDLSRN  
 ratTLR9 AEKGVWPWASLTPALPSTPVSKN-----FMVRCNLRFTMDLSRN  
 MdTLR9 QDPLPTLGVNRAPEVIAETLLEEEG-ASQDHPLT-----SELFMPNCGPPNFTLNLNLSRN  
 fTLR9 VRDLSFSQPFLMETKPNVTFGFNFDLQSHRLETSPSPFTQSSPLWETFCCKNKVTFDLSQN  
 tetTLR9 TCNLGSSNP SLVRKGNVTFERDFLDQFDRLEMS---SPQSSLLWKKFCQKKVTFDLSQN  
 XtTLR9 LA---MHPPLFDRGNQVDGG--WMDSHCGPKQV---EAGEVEYPGCWQYNHSDVLSFN  
 mTLR3 -----FVSLAHSP-LLTLNLTKN  
 hTLR3 -----FVSLAHSP-LHILNLTKN  
 MdTLR3 -----FSSLAYS-LLILNLTRN  
 chTLR3 -----FVSLANSR-LQVLNLTKT  
 XtTLR3 -----FLSLKSP-LYHLNLTKT  
 fTLR3 -----FLSLAAS- LRKLNLTGA  
 tetTLR3 -----FVSLAGSP- LRKLNLTGT  
 zebTLR3 -----FAGLKESPLLQTLNLTM  
 cfishTLR3 -----FASLNGSSLLQMLNLTM  
 hTLR5 -----LPKVAYIDLQKN  
 mTLR5 -----LPRVAYVDLQRN  
 MdTLR5 -----LSKVAYIDLQRN  
 XtTLR5 -----LTVVTVIDLEQN  
 XtTLR5 -----LPDLTXIDLQQN  
 fTLR5 -----LSELRVLDLSYN  
 tetTLR5 -----LAELRVLDLSYN  
 troutTLR5 -----LPNILELDISYN  
 mTLR13 -----FPNLEVLDLGDN  
 ratTLR13 -----FPNLEVLDLGDN  
 MdTLR13 -----FLSLENLNLRN  
 XtTLR13 -----FSNLRVLDLQDN  
 chTLR21 -----LHRLRTLNLNRN  
 XtTLR21 -----LTELRIILNRN  
 fTLR21 -----LFNLNILNLNRN  
 fTLR23 -----PAKLQLLDLSRN  
 tetTLR23 -----PAGLRSLDVSRN  
 fTLR22 -----LPNLKQLHLNSN  
 tetTLR22 -----LQNLRLQLHLNSN  
 halTLR22 -----LPNLRQLLLNGN  
 troutTLR22 -----LHKLEFLSMSYN  
 XtTLR22 -----LPTLQRLTISKN  
 mTLR12 -----LPALTTLSLDDT  
 mTLR11 -----LPALTTLNLLGT  
 hTLR4 -----LEFLDLSRN  
 rabbitTLR4 -----LEFLDISN  
 pigTLR4 -----LQFLDLSGN  
 mTLR4 -----LSYLDLSRN  
 MdTLR4 -----LQILDLSKN  
 chTLR4 -----HLEVVDLSEN  
 XtTLR4 -----ELKVLDLFSNN  
 zebTLR4 -----QYVDLSGN

|            |       |              |
|------------|-------|--------------|
| hTLR2      | ----- | RITVENS      |
| rabbitTLR2 | ----- | RVTVENS      |
| pigTLR2    | ----- | RITIENS      |
| mTLR2      | ----- | RITVENS      |
| MdTLR2     | ----- | RITLTSS      |
| chTLR2     | ----- | RLSIASS      |
| XtTLR2     | ----- | NIACIDS      |
| fTLR2      | ----- | KVSIINA      |
| halTLR2    | ----- | RVSVINS      |
| zebTLR2    | ----- | NVSVINA      |
| hTLR1      | ----- | IKNFTVSGT    |
| mTLR1      | ----- | IQNFTMSGT    |
| hTLR6      | ----- | IMMLTIADT    |
| pigTLR6    | ----- | IRMLTIADT    |
| mTLR6      | ----- | IKMLSISDT    |
| MdTLR1L    | ----- | INMLTITDS    |
| hTLR10     | ----- | IENLTISNA    |
| ratTLR10   | ----- | LENLTISDA    |
| MdTLR10    | ----- | TENLTISGA    |
| chTLR1L1   | ----- | IDSLTIHDA    |
| XtTLR1L3   | ----- | VENVTFSNA    |
| XtTLR1L1   | ----- | VENITFSRA    |
| XtTLR1L2   | ----- | IENLTLNFA    |
| fTLR1      | ----- | VENLALTET    |
| tetTLR1    | ----- | VESLALTDT    |
| tetTLR14   | ----- | RIKSISIQYV   |
| fTLR14     | ----- | NIRLSIQYV    |
| XtTLR14    | ----- | KVSHLDIINV   |
| XtTLR14L1  | ----- | KISNLYIINV   |
| XtTLR14L2  | ----- | KVRNLQLSRV   |
| XtTLR14L3  | ----- | KVSNLYIINV   |
| XtTLR16    | ----- | LNDLRVLDLRNN |
| chTLR15    | ----- | ESVKHLKVSNC  |

|           |                                               |            |
|-----------|-----------------------------------------------|------------|
| MdTLR7    | NLFFVKPSDFEDLSF---LKCLNLSGNSISQTLNGSEFQ-----  | PLAKLKYLDF |
| hTLR7     | SIFFVKSSDFQHLSF---LKCLNLSGNLISQTLNGSEFQ-----  | PLAELRYLDF |
| chTLR7    | NIFFVNSIDFQDLSF---LKCLNLSGNAISQTLNGSEFY-----  | YLSGLKYLDF |
| XtTLR7    | NIFFVKATDFTNLSF---LKCLNLSGNAISQTLNGSEFR-----  | NLNRLKYLDF |
| tetTLR7   | NIFFLHSR-FLNLSRE---LKCLNLSGNAMSQSLNGSEFT----- | YLSGLQYLDF |
| fTLR7     | NIFFLHSR-FLNLSRE---LKCLNLSGNAMSQSLNGSEFT----- | YLTGLQYLDF |
| hTLR8     | SIFFIGPNQFENLPD---IACLNLSANSNAQVLSGTEFS-----  | AIPHVKYLDL |
| pigTLR8   | SIFFIGPNQFEAFKD---IACLNLSNGNGQVLHGSEFS-----   | HLPGIKCLDL |
| mTLR8     | NIFIIGKSQFEGFQD---IACLNLSFNANTQVFNTEFS-----   | SMPHIKYLDL |
| MdTLR8    | SMFFINSLQFQSFND---VKCLNLSFNNGAQLVNGSEFL-----  | SMPHIKYLDL |
| XtTLR8    | SIFFIDPKEFRSFSD---VSCLNLSNGIGQDLNGTEFI-----   | YLNKLTYLDL |
| tetTLR8   | NFLFISTKQFEG--D---IACLNLSGNGFSSALNGSEFS-----  | FLPNLTYLDL |
| fTLR8     | NFLFISTKEFEG--D---IKCLNLSRNGFAPALNGTEFS-----  | FLPNLTYLDL |
| hTLR9     | NLVTVQPEMFAQLSH---LQCLRLSHNCISQAVNGSQFL-----  | PLTGLQVLDL |
| pigTLR9   | NLVTIQSEMFAQLSR---LECLRLSHNSISQAVNGSQFV-----  | PLTSLRVLDL |
| mTLR9     | NLVTIKPEMFVNLSR---LQCLSLSHNSIAQAVNGSQFL-----  | PLTNLKYLDL |
| ratTLR9   | NLVTIKPEMFVNLSH---LQCLSLSHNCIAQAVNGSQFL-----  | PLTNLKYLDL |
| MdTLR9    | NLVTVQQEIVFNLSA---LKCLRLSSNSISQAVNGSQFS-----  | PLTNLWLDL  |
| fTLR9     | DIMSVNQEVLAGMEN---AVCLDLSFNYSQALKYGMFS-----   | SMKHLVFLNL |
| tetTLR9   | NIISVNRKVLGMEH---VACLDSFNYSQTLRSGMFD-----     | GMKYLVFLNL |
| XtTLR9    | NIGSIYPDEFGLMDE---IECLNMSYNYINQRLNGTQFG-----  | HLKSLRHLDL |
| mTLR3     | HISKIANGTFSWLQ---LRILDGLNEIEQKLSGQEW---       | GLRNIFEIYL |
| hTLR3     | KISKIESDAFSLGH---LEVLDLGLNEIQELTGQEW---       | GLENIFEIYL |
| MdTLR3    | KISQIESGAFSLGH---LEVLDLGVNEISQELTGQEWK-----   | GLENIMEIYL |
| chTLR3    | RISTVESEAFSSLGQ---LKILDGLNEINQELTGHEFE-----   | GLNNIEIYIL |
| XtTLR3    | GLTKIENGAFCLKH---LQLLDMGLNQIDQEVSGNELE-----   | GLANIEMIYL |
| fTLR3     | AVVQISPGGFSTLKS---LTVLLLDNSNFIKQTLTGREFE----- | GLGQLEEIHM |
| tetTLR3   | AITQISPGGFSALRN---LTVLLLDNSNFIKQTLTGREFE----- | GLAQLEEMHM |
| zebTLR3   | GINKLEPGAFSSFGN---LSNLLMSRNFINQQLQGNFKE-----  | GLSNIKEIDM |
| cfishTLR3 | GIKTLEPGAFSSLGN---LEILVLSHNYINQQLTGEEFQ-----  | GLNSIREIHL |
| hTLR5     | HIAIIQDQTFKFLEK---LQTLDLRDNALTTIH-----        | FIPSIDPIL  |
| mTLR5     | HIGIIQDQTFRLLKT---LQTLDLRDNALKAIG-----        | FIPSIQVLL  |
| MdTLR5    | HIGIEKQTFKHLKN---LQTLDLRDNAIKTVY-----         | FLPSVHTAFL |
| XlTLR5    | HIGAIQINTFKSLSE---LNTLNLRGNSMKTIT---FFE-----  | SPVSIYIFV  |
| XtTLR5    | HIGAIQNNAFKSLEK---LNYLDLDRGNAMKKT---FFE-----  | ALIPITYIFV |
| fTLR5     | HIGALGSKAFSGLPE---LRGLYLGTGNSLRKLGFP---A----- | SLPKLEFLL  |
| tetTLR5   | HIGALGHQAFSGLPK---LRGLFLTGNSLRNLGFP---A-----  | SLPNLELLL  |

troutTLR5 HIGALGYQAFKGLPN---LQVLDLTGNSIRGLGTYGSLA-----PLPNIQLLRL  
mTLR13 NIRTLNHGTFRPLKK---LQSLILSHNCL-KILEPNSFS-----GLTNLRSDDL  
ratTLR13 NIRTLNHGTFRPLKK---LHTLILSHNRL-EIMESNAFS-----GLTGLRYLDL  
MdTLR13 NLRTLKKNFTFLFLKN---LQVLTLSYNRL-ATIEKSAFS-----GLPKLYKLDL  
XtTLR13 SISLIKSNAHYLRK---LETLLLSGNKI-LTIQKNGLK-----GLVSLKELSL  
chTLR21 RVSVLFSGVFQGLAE---LQTLDLGGNNL-RHLTAQSLQ-----GLPKLRRLYL  
XtTLR21 RVSVLFSGVFQGLAE---LQTLDLGGNNL-RHLTAQSLQ-----GLPKLRRLYL  
fTLR21 RISVIFNNTFRNLKN---LTTLDLGGNKI-THFEPGLC-----GLERLSKLYL  
fTLR23 SVSVYDDGYFQSLGW---LTHLDVSSDKV-GRVTPGAFV-----GLHRLKSLHV  
tetTLR23 MVTVYDDGSFQGLGG---LMYLDVSSENG-GRVTPGAFV-----GLDRLRSLHV  
fTLR22 KLVAINHGEFGLRLS---LQNLSLHSNQI-KKLGMSFSL-----GLKNLTDIHL  
tetTLR22 RLAAISRQ-----  
halTLR22 QLTALKHGEFRGLQS---LQNLSLHENKI-FNLDKGCFFV-----GLTNLTDIHL  
troutTLR22 KLSSISKGDFFKGLAS---LKTLLLFDFNQI-ASLEDGAFE-----GLVNLTELRL  
XtTLR22 KLSLSTNTFQNVTF---LKNLHLNADNQI-EVIDPGAFS-----GLDKRRTLII  
mTLR12 QIRMSPEPGFWGAKN---LHTLSLKLPLA-PAPAVLFLP-----MYLTSLELHI  
mTLR11 YLEYILGIQLQGPKM---LRHLQLGSYPI-LDIYPPWPP-----TLLS-LEIQA  
hTLR4 GLSFKGCCSQSDFGT---TSLKYLDLSFNGV-ITMSSN-FL-----GLEQLEHLDF  
rabbittTLR4 GLSLQSCCSVNSLRL---TQLKHLNLSFNGV-ITMSSN-FV-----GLEQLEHLDF  
pigTLR4 HLSFKGCCSHNEFGT---TKLKHLDLSFNEI-ITMSSN-FM-----GLEQLEHLDF  
mTLR4 ALSFSGCCSYSDLGT---NSLRHLDLSFNGA-IIMSAN-FM-----GLEELQHLDF  
MdTLR4 SLNVLSCCSDKTFNT---PNLKYLNLSYNAH-ISLSKN-FM-----GLENLESDDL  
chTLR4 RLSFLTCCSPKFPRS---PNLKHLNLSFNSD-ISLTGE-FA-----NLRNLLYLDL  
XtTLR4 QLNMMYYCTQLVAGTKESRIQHLNLSYNSF-IGFDSA-FI-----NMPHLQSLDL  
zebTLR4 MLILHECCSILFPRT---PNIQYLNLSQNSE-ITFVNEPFS-----ALDLEVLDF  
hTLR2 KVFLVPCLLSQHLKS---LEYLDLSENLMVEEYLKNSACED-----AWPSLQTLIL  
rabbittTLR2 KVFLVPCSLSQHLKS---LEYLDLSENLMVEEYLKNSACEK-----AWPFLHTLIL  
pigTLR2 KVFLVPCSLSQHLKS---LEYLDLSENLMVEEYLKNSACEH-----AWPFLHTLIL  
mTLR2 KVFLVPCSLSQHLKS---LEFLDLSENLMVEEYLKNSACKG-----AWPPLQTLVL  
MdTLR2 KVFLVPCDLKSKSLKS---LEYFDLSDSLMSEGALENSACEG-----AWPSLHTLNL  
chTLR2 KVFMVPCRLARYFSS---LLYLDLFDHNLNLLVNNRLGETICED-----AWPSLQTLNL  
XtTLR2 KVFLMPCAFSRFSS---LQYLDLSDNLLSDNLLASSACAFEG---GG-AWPILQTLNV  
fTLR2 KVFMVPCFTSHLLKN---LQYLDLSDNLLTDMTDLAETLDCDGS-----PLKDLRVLNI  
halTLR2 RMFVIPCDDTFFLMSS---LQYLDLSDNLLTDMTDLVETLCSKRG-----ALKDLRVLNI  
troutTLR2 TVFVIPKETTFFLLKN---LEYMDLSDNLLTDDTLTIQPTLYTGSG-----AYQNLNMLNV  
hTLR1 RMVHMLCPSKISP---FLHLDLSDNLLTDTVFENCG-----HLTELETLIL  
mTLR1 HMVHMLCPSQVSP---FLHVDFTDNLNLLTDMVFKDCR-----NLVRLKTLSL  
hTLR6 PFIHMLCPHAPST---FKFLNFTQNVFTDSIFEKCS-----TLVKLETLIL  
pigTLR6 PFIHMLCPHAPST---FKFLNFTQNVFTDSVVFQNC-----TLARLETLIL  
mTLR6 PFIHMLCPHAPST---FTFLNFTQNVFTDSVVFQGC-----TLKRLQTLIL  
MdTLR1L RMLHMSCPFPKSP---FQYLNFNANLFPDTIFPDCK-----NLSLLQTLIL  
hTLR10 QMPHMLFPNYPTK---FQYLNFNANLITDELFRKTI-----QLPHLKTIL  
ratTLR10 QMPHMLFPNYPTK---FQYLNFNANLITDELFRKTI-----QLPHLKTIL  
MdTLR10 GMPHIIFFPDYPSK---FQHLNFTNNALDELFRKTL-----LLPHLKTIL  
chTLR1L1 CMPHMLCPSKRS---FQYLNFNANLITDELFRKTI-----TLANLKITIL  
XtTLR1L3 GMIHFFCPCPSPSI---VRFLNLPNRLTDEIFLNCS-----SLNELELNL  
XtTLR1L1 ELYFFFCPPAPSI---FRVFLNLPNRLTDDIFQNC-----NLKELELNL  
XtTLR1L2 SLLFMVCPNLSST---FQSIDFSHNLALTDLFRKDF-----TLINLKRKL  
fTLR1 SIIHMTCPKSESP---ITQLNFSYCSMTDTIFSRVEGLITV---ECKTLGNVRTLAL  
tetTLR1 AIIHMTCPKSPSP---VTHLSFSHCSLSDTIFSRVEGLITI---ECKTLGNVRTLAL  
tetTLR14 YFNSVPCDSWVEMKE---LVLDVSDNRLTDAYVFNQLCNYKG-----TAPNRLFNFM  
fTLR14 YFNSVPCDSWVEMKE---LVLDVSDNRLTDAYVFNQLCNYKG-----TAPNRLFNFM  
XtTLR14 NFNFPVPCDAWSQMVN---VERLDISNNRLLASNLNLLCQYS-----ELPNLHTFTA  
XtTLR14L1 NFNFPVPCDAWSEMSN---LEKLDMSDELVDYLYNPWCQDV-----ALPTTDTFIA  
XtTLR14L2 HLGSLPCIAWRQMGN---IECLDVSDNRLIGSNLYNPSCWDG-----GLPKLDTFIA  
XtTLR14L3 NFNFAQCDDTWSQMK---VERLDIRNLLSSDLYNPSCYK-----ELPKLHTFTA  
XtTLR16 RLTSLQISSLSGLSN---LMELYLQNNVMESMQRYSKQTKLRLVKIGFVSVSVFEL  
chTLR15 SIVELPEWFANRME---LLFLDLSSNRLSMLPDL-----ISLQQLDI

MdTLR7 SNNKLDLLH---STAFQELQ-ELEVLDISGNSHYFQSEGITHMLNFTKNLQVLKKLMMNG  
hTLR7 SNNRDLH---STAFQELQ-ELEVLDISGNSHYFQSEGITHMLNFTKNLQVLKKLMMND  
chTLR7 SNNRDLH---STAFQELQ-ELEVLDISGNSHYFQSEGITHMLNFTKNLQVLKKLMMNE  
XtTLR7 SNNRDLH---STAFQELQ-ELEVLDISGNSHYFQSEGITHMLNFTKNLQVLKKLMMNN  
tetTLR7 SNNRDLH---STAFQELQ-ELEVLDISGNSHYFQSEGITHMLNFTKNLQVLKKLMMNH  
fTLR7 SNNRDLH---STAFQELQ-ELEVLDISGNSHYFQSEGITHMLNFTKNLQVLKKLMMNH  
hTLR8 TNNRDLDFD---DAAFSELP-LLEVLDLSYNSHYFRIAGVTHRLGFIQNLPLQRLVNLNSH  
pigTLR8 TNNRDLDFD---DAAFSELP-LLEVLDLSYNSHYFRIAGVTHRLGFIQNLPLQRLVNLNSH  
mTLR8 TNNRDLDFD---DAAFSELP-LLEVLDLSYNSHYFRIAGVTHRLGFIQNLPLQRLVNLNSH  
MdTLR8 THNQDLDFD---DRAFQELQ-ELEVLDLSHNEHYFQIAGVTHRLGFIQNLPLQRLVNLNSQ  
XtTLR8 SFNKLDLFD---INAFQELP-ELEVLDLSYNSHYFIVDGVHSLKFIENLQHLKVLNLSW  
tetTLR8 SFNKLDLFD---INAFQELP-ELEVLDLSYNSHYFIVDGVHSLKFIENLQHLKVLNLSW

fTLR8 SFNKIDLAY---SLAFNDLK-KLQVLDLSYNPHYFNVQGITHKVNFRLRNLVPLRVLNMSSH  
hTLR9 SHNKLDLYH---EHSFTELP-RLEALDLSYNSQPFGMQGVGHNFVFAHLRTRLRHLSLAH  
pigTLR9 SHNKLDLYH---GRSFTELP-RLEALDLSYNSQPFTMQGVGHNLSFVAQLPALRYLSLAH  
mTLR9 SHNKLDLYH---WKSFSLEP-QLQALDLSYNSQPFSMKGIGHNFVTHLSMLQSLSLAH  
ratTLR9 SYNKLDLYH---SKSFSLEP-QLQALDLSYNSQPFSMQGIGHNFVFLANLSRLQNLSLAH  
MdTLR9 SHNKLDLYY---SSSFTELP-RLRALDLSYNSQSFKAHGIGHNLTFVSRRLSLRYLSLAH  
fTLR9 SYNRLDFYY---NESFSELNNTLKLDDLSNNDFFHFKMRGMGHRLTFFIKKVNLEVLNLAN  
tetTLR9 SYNRLDLYY---DEAFSELKDTLKLDDLSNNDYHFKMKGMGHRLTFFIKNVLNLEVLNLAN  
XtTLR9 SHNRFDYMY---YKALSELP-RLKILNLAHNDYQFMMKGVNHRLDLFLENLTSLVELNLAN  
mTLR3 SYN-KYLQL---STSSFALVPSLQRLMLRR----VALKNVDISPSPPFRPLRNLITLDLSN  
hTLR3 SYN-KYLQL---TRNSFALVPSLQRLMLRR----VALKNVDSSPSPPFRPLRNLITLDLSN  
MdTLR3 SYN-RYLIL---NSNSFASVPIKRLMLRR----VDCKQLDVSPPFHPRLRNLITLDLSN  
chTLR3 SYN-KNVTL---RSEFIFVPSLKLMLRK----VGCNNLAISPSPPFHPRLRNLITLDLSN  
XtTLR3 SYN-RRITL---TSNSFIFAPSLSKLYLRK----TALTFRDLNPSPPFKVLQNLITLDLSN  
fTLR9 SLNFQKVN---SSASFAVPSLKLMLRK----SLTSTALNVDPSPPFSPVPLVLDLSN  
tetTLR3 SLNYQKVN---SSASFAVPSLRLVTLGK---SLISTALNLDPSPPFSPVHLVLDLSN  
zebraTLR3 SINQQSISL---TNASFVHVSTLRILKLR---ALKG-TLDMEPSPPFRPLVNLITLDLSN  
fishTLR3 SFNQQMITL---CLRRYTCP-TRLTMLLGH---ALSS-NLEVEPSPPFRLLVNLITLDLSN  
hTLR5 SGNKLV---LPKINLTAN---LIHLSN---RLENLDILYFLLR-VPHLILNINQ  
mTLR5 GGNKLVH---LPHIHFTAN---FLELSEN---RLENLSDLYFLLR-VPQLQFLILNINQ  
MdTLR5 SGNKLVH---IEENINITAG---FLDLAEN---RLANLNDLYILLQ-IPDLKFLILNK  
XtTLR5 GGNKLS---IDSSFVYSN---FLDLSN---DLRDLGGLYKLLQ-YPLLQYVILKR  
XtTLR5 GGNKLS---IDSSYVYST---FLDLSN---DLNLDGGLFKILQ-YPLLQYVILKR  
fTLR5 GDNKLS---LYSVMDLAANSTYMDVRDN---RLNLEDVYMLITDFHRLETLMFGG  
tetTLR5 GDNKLS---LYGVADLAGNSTYLDVRDN---RLSNLNNVHLLLSRFHHLKELMFGG  
troutTLR5 ADNKITS---LEGLSVFAPSTIILNVQNN---RLTNLEDVYTVLAKLMHIEFLWYGN  
mTLR13 MYNLSYFHE---HLFSG-LEK-LLILKLGFNKITYETTRTLQYPPFKLKLQNLNLEGG  
ratTLR13 MYNLSYFHK---HHFMG-LEK-LLVLKLGFNKITYETTRTLQYPPFMKLSLKLQNLNLEGG  
MdTLR13 AYNILSDFHP---GMFLG-LEG-LEVLDLSFNKITYETLKSQPPPFKDLQTLKRLNLEGG  
XtTLR13 ANNNIYKITD---NTFKF-VKS-LRSLDLSRNQL-WPLHKFQSPTPFLNLTQLEYLDASQ  
chTLR21 DRNRLLEVSS---TVFAP-VQATLGVLDLDRANLQYISQWLKPPPPFRNLSLYDLKLQQA  
XtTLR21 DGNQIKEISR---YVFSH-VESTLLVLDLKS NHLRYNTTRETYSF-FLTLKLYDLKLQQA  
fTLR21 DGNLQITIDS---SAYHI-FQNTLTTLDLRQNMIFEEVDN-FSP-FVNLTKLEDLKLDEQ  
fTLR23 SIPLDYECDF---RG-----LKQLENTIS-ITISDTRSPPKYSQALFHLKSLRSFHVAC  
tetTLR23 SIPMDYECDF---RG-----LHQLENTIS-MTMDPGRAPPYRYSQALFHLRSLRSFHVAC  
fTLR22 QLNMIETEPI---AGGVFNDLINLRRLDLSNHIRYNSRPLRNPFFLHLSLETLYIPSQ  
tetTLR22 -----  
halTLR22 QNNQIRETEI---SKGVFNDLINLRRLDLSNHIRYNSRPLRNPFFLHLSLETLYIPSQ  
troutTLR22 QSNKITQIDI---RNTVLTGLPHLRTLDISCNITYVNDKLDPPPLSHLTSLENLLIFSQ  
XtTLR22 GSNKITRNTL---HNMTFQGLGSLLELQLFNGYLNYSNLYLDIVPFLPLKSLKMITLNSQ  
mTLR12 ASGTTEHWTL---SPAIF---PSLETTLISGGGLKLLKLSQNASGVFPALQKLSLLKNSLD  
mTLR11 ES-CIQFMIH---SGQPF---LFLNLTLETSILLKLP--DNITIHFPRLRRLTLRGYSF-  
hTLR4 QHS-----NLKQMEFSVFLS-LRNLIDYLDISH  
rabbitTLR4 QHS-----NLRNINEFSIFLS-LNLLYLDISY  
pigTLR4 QHS-----SLKQANDFSIFLS-LRNLHYLDISY  
mTLR4 QHS-----TLKRVTFSFAFLS-LEKLLYLDISY  
MdTLR4 QHT-----ILKDHDKYPAFYS-LINLRYLDISY  
chTLR4 QHT-----KLIHHGTYPVFLL-LQKLIYLDISY  
XtTLR4 IHS-----KIQTVGKFPVFM---LINFLDLSY  
zebraTLR4 HHT-----KLVIVFYFGFFKH-LRNLKYLDISY  
hTLR2 RQN-----HLASLEKTGETLLTLKNLTNIDISK  
rabbitTLR2 RQN-----HLTSLEKTGETLLTLKNLTDLDISK  
pigTLR2 RQN-----HLKSLEKTGEVLVTLKNLTDLDISK  
mTLR2 SQN-----HLRSMQKTGEILLTLKNLTDLDISK  
MdTLR2 SQN-----KFESLKTMGELLTVKNLTHLDISK  
chTLR2 SKN-----SLKSLQAARYISNLHKLINLDISE  
XtTLR2 SRN-----LLTSLRRLAQITSLKYLTLNLDVSO  
fTLR2 SGN-----ALKSLSTTSRLVGLLRLTHLDSR  
halTLR2 SGN-----ALKSLSTLSRLVERLHKLTHLDSR  
zebraTLR2 SQN-----VLKSLGLMSRLVTLNKLKYLDLSY  
hTLR1 QMN-----QLKELSKIAEMTTQMKSLQQLDISQ  
mTLR1 QKN-----QLKNLENIILTSAKMTSLQKLDISQ  
hTLR6 QKN-----GLKDLFKVGLMTKMPLEILDVSW  
pigTLR6 QKN-----KLEDLFKISLMTKDMLEILDVSS  
mTLR6 QRN-----GLKNFFKVALMTKNMSSLETLDVSL  
MdTLR1L QKN-----KLTHLSKIAEMTEKMSLKHLDLSQ  
hTLR10 NGN-----KLETLSLVSCFAN-NTPLEHLDSQ  
ratTLR10 RGN-----QLETLSLVSLFAN-HTSLLHLDLSQ  
MdTLR10 QRN-----KLETLSVSSFAI-NTSLIHLDSQ  
chTLR1L1 HRN-----KFESLSKVSFMTSRMKSRLYLDMS  
XtTLR1L3 QNN-----KLEQMSKISSMTLKMKNLKHLDLSK  
XtTLR1L1 QNN-----KLEQMSKISSMTLMPNLKHLDLSR



XtTLR1L2 RKN-----KLEKIYKLSAMTENMPSLEYLDASH  
 fTLR1 AGN-----NLKSLKSLSI RMQYMKSLQDLDLSL  
 tetTLR1 ARN-----NFKSLQSLSKRMR YMKSLQDLDLSF  
 tetTLR14 STN-----ELTSKDL SLLTKEFQQLQEMDL SR  
 fTLR14 SNN-----ELTSKDL SLLTKEFQQLQELDL SR  
 XtTLR14 SDN-----NMRSLYTSL SLLTLPK LATLDL TS  
 XtTLR14L1 AYN-----NLQSLRMLS LLTAKWPKLATLDL RS  
 XtTLR14L2 ANN-----NLQSLRLI SLLTAKWPKLTKLDL SS  
 XtTLR14L3 ANN-----NLQILKPI SLLTANWPKLSSLDL SS  
 XtTLR16 FPNTE TLDIQT TGKIYITVFMNETAASSLKSLSVNGSHVELDIKCGHQFFSTLRELKVINN  
 chTLR15 SNSDIKIIPP-----RFKSLSNLTVFNIQNNKLT EMHPEY

MdTLR7 NDISTSTST----EMESLSLKILEFRGNHLDVLRDGDN-RYLGFFRNLIHLEVLDISQ  
 hTLR7 NDISSTSR----TMESESLRTELEFRGNHLDVLRREGDN-RYLQLFKNLLKLEELDISK  
 chTLR7 NEISTSIST----GMESQSLQTLEFRGNRLDIFWSDGKK-EYLSFFKNLTNLEQLDISS  
 XtTLR7 NQISTSTNR----HLVSQSLRILEFKGN YLNILWKDGD T-RYLNFFKNLNKLYKLDISE  
 tetTLR7 NKISTSTNT----ELESQSLERLEFRGNRLDVMWRDGD T-RYLN YFKKLSNLAILDISH  
 fTLR7 NKISTSTNT----ELESQSLERLEFRGNRLDMLWRDGD T-RYLN YFKKLSNLAVLDISH  
 hTLR8 NNIYTLTDKY----NLESKSLVELVFSGNRLDILWNDDDN-RYISIFKGLKNLTRLDL SL  
 pigTLR8 NSIFTLTETY----LKSTSLKELVFSGNRLDLLWNAQDD-RYWQIFKNLSTLTHLDLSS  
 mTLR8 NGIYTLTEES----ELKSISLKELVFSGNRLDHLWNANDG-KYWSIFKSLQNLIRLDL SY  
 MdTLR8 NDIFTLTEHQ----LESQSLELEFRGNRLDIMMWEEDN-RYIKIFTNL SGLIWLDSLQ  
 XtTLR8 NKISTLTDFR----LTSHSLKELQFSGNRLDVLWKNEDK-RYHKLFMNLSSLTCLDISY  
 tetTLR8 NGIYTLTTKH----MESKSLAELRF SHNNGILWKEKDD-SYRTLFTNL TNLTILDISF  
 fTLR8 NDISTLTTKY----MESKSLAELRFTHNYLGT LWKENDL-SYKKLFTKLTNLTILDISF  
 hTLR9 NNIHSQVSQ----QLCSTSLRALDFSGNALGHMWAEGD--LYLHFFQGLSGLIWLDSLQ  
 pigTLR9 NDIHSRVSQ----QLCSASL CALDFSGNDLSRMWAEGD--LYLRFFQGLRSLVWLDL SQ  
 mTLR9 NDIHTRVSS----HLNSNSVRFLDFSGNGMGRMWDEGG--LYLHFFQGLSGLLKLDSLQ  
 ratTLR9 NDIHSRVSS----RLYSTSVEYLD FSGNGVGRMWDEED--LYLYFFQDLRSLIHLDSLQ  
 MdTLR9 NQINTRISH----SLSSPSLIALDFSGNELSRMWAEGD--LYLRFFQNLRTLVRDLDSLQ  
 fTLR9 NAIAMRIDQ----RLV SASLKQLSFGNLDLNTMWSSENN-QYVNFHNLTSLYTLDISD  
 tetTLR9 NAI AARIDQ----RLVSDSLKQLYFSGNDLNL MWSSENN-QYLNFFQNL TNLT YLDISD  
 XtTLR9 NFIGLRITR----ELKSHSLETLFRFRNNELGSSWQY GKD-TYLNMFNTLRSKLILDISY  
 mTLR3 NNIANINEDL----LEGLENLEILDQHN NLARLWK RANPGGPVFLKGLSHLHILNLES  
 hTLR3 NNIANINDDM----LEGLEKLEILD LQHNNLARLWK HANPGGPYFLKGLSHLHILNLES  
 MdTLR3 NNIANINAEM----LEGLDKLEILD LQHNNLARLWK HANPGGPVFLKGLSHLRVLNLES  
 chTLR3 NNIANIREDL----FNGLHELDILNLQH NNLARLWK CANPGGPVFLKGLDVPNLHILNLS  
 XtTLR3 NNIANIQEDV----FESLSNLRILDFEHN NLARLWKEANPGGPVFLKGLKLEKLSL SLS  
 fTLR3 NNIANIRRTL----LKGLVNLRVLKLQH NNFARLWKNNNVGGPVMFLQD TLKLTLLMDS  
 tetTLR3 NNIANIRRTL----LKGLGRLKVLK LQHNNFARLWK NANPGGPVMFLQDAVKLRTLLMDS  
 zebTLR3 NNIANINGDL----LEGLYNLKVVKMQH NNLARLWK MANPGGPVFLKGLDATNLSYLNLDY  
 cfishTLR3 NNIANIKNGL----LDGLHHL SVLKLQH NNLARVWKNANPGGPVILIRDAHLGVLKLELDY  
 hTLR5 NRFSSCSGDQ---TPSENPSLEQLFLG ENMLQLAWETELC---WDVFEGLSHLQVLYLNH  
 MdTLR5 NRLSSCAAH---TPSENPSLEQLFLTENMLQLAWETGLC---WDVFQGLSRLQIYL SN  
 MdTLR5 NRF SFCNQY---GPSKNHTLEQLYLS ENMLQLIWEAGKC---WDVFKRLSHLKI FLNN  
 XlTLR5 NRLSVCYPHF---NISKNNSLLHL DLSDNMISLIW DNGQC---GNIFSNL SLLGVLKLN  
 XtTLR5 NRLSVCYSHF---SISKNN SLLHL DLSDNMINLIW DNGQC---LNVF SNL SLLGLLKLN  
 fTLR5 NLIKWCTLNRKW-AVPINGTLKVLDVHDS SLQKVWMEGKC---LDLFDHLCNLRGLNLSF  
 tetTLR5 NFIKWQLNGEP-PIPPNSSLKVLDLHDS SLQTIWSRGQC---LDL FHHNLHLQGLNLSF  
 troutTLR5 NFIKWCTLNNI-SVPAVNSLKLLEFRLNIALQMIWARGEC---MHV FQHLKGLSLDLSF  
 mTLR13 R---HGIQVVP SNFFQGLSGLQELLLGKNPSVFLD-----HHQFDPLINLTKLDISG  
 ratTLR13 K---HGIQVVP RNFQGLSGLQELLLGKNPSVFLD-----HHQFDPLINLTKLDISG  
 MdTLR13 I---NGIQVVP INFFQGLSGLQELLLGKNPSVFLD-----HLQLDQLPNLTRLDISG  
 XtTLR13 A---EGNIYIPASL FQGLSGLQELLLGKNPSAFFR-----NVSFEFLNLNLT ELDISA  
 chTLR21 QP---YGLKMLPHYFFQGLVRLQQLSLSQNMLRSIP-----PDVFE DLGQLRSLALAD  
 XtTLR21 QP---YGLTAIPQGFFKGLSKALYLAQNRISSLS-----SDAFNELGQLTYLSLAE  
 fTLR21 KP---YGLHILPRTLFRGLYSLRSLYVKNNMISYLA-----ADVFRDLKHLNFLSLDN  
 fTLR23 GFHYGFPLDVPLSMLSSMTQLEEF TADNIYLSAPD-----PETFRSNRSLRSLKISQ  
 tetTLR23 GFHYGFPLDVPLDMLRSMRNLEEFTAVNIYVSAPG-----PDTFGSNRRLRSLRISQ  
 fTLR22 ---RRRGRSQLP SNILKGLSNLLEFTCRNSQLVWLP-----VDTFSYTPRLQRLDISS  
 tetTLR22 ---FNCNRSQLLSLS-----KNMFYTPRLQRLDISS  
 halTLR22 ---HGKGKSQLPRNLLEGLTNLLVFNIRNIQLASLH-----KDMFNGTPQLTTLDISS  
 troutTLR22 ---RHKGLCHLPINFLEGLTSLLSFQAGSLNIKDLH-----PDTFIHTPQLWFLDMSK  
 XtTLR22 ---GHNGMQNLPINF FEGLLALERI HAGNLALSSID-----SRTFSYTPQLRELDISE  
 mTLR12 ---AFCSQGTSNLFLWQLPKLQSLRVWAGNSSRP-----CLITG-LPSLRELKLAS  
 mTLR11 ---IFSTSQ LQRFFPQLPLLEHFFIWCENSYAVD-----LYLFG-MPRLRVLNLEGY  
 hTLR4 THTRVAFN---GIFNGLSSLEVLK MAGNSFQENF-----LPDIFTELRLNLTFLDL SQ  
 rabbitTLR4 THIRVAFR---GIFDGLYSLRVLKMAGNAFQDNR-----LLNIFTEMTSLTTLDLSS  
 pigTLR4 TNIHVVFR---GIFAGLVSLQTLKMAGNSFQNNL-----LPDVFTDLTNLILLDL SK  
 mTLR4 TNTKIDFD---GIFLGLTSLNTLKMAGNSFKDNT-----LNSVFANTNLTLFLDL SK  
 MdTLR4 TNTHVKFK---NIFTGMSNLKHLKMAGNSFQDNI-----LHDI FKNLTKLVSLNISY

chTLR4 TKTHVMESH---LIFHGLNSLQVLKMGNSFENNT-----LTNNFENVRRRLRILDISS  
 XtTLR4 TYCHFPIID---CSFCGLYRLEELRVSSTFAGDI-----LSVVFQNLTKLLSLHLSE  
 zebTLR4 TRVHFNTL----TFQDLHNLTVLKMAGNSFSGDK-----LSYFLQNLTSLEVLDISQ  
 hTLR2 NSFHSMP----ETCQWPEKMKYLNLS--TRIHSV-----TGCIP---KTLEILDVSN  
 rabbitTLR2 NTFHAMP----DTCQWPERLRRLNLSS--TRIHSL-----TYCIP---QTLEILDVSN  
 pigTLR2 NNFD SMP----ETCQWPEKMKYLNLS--TRIHSL-----THCLP---QTLEVLDISN  
 mTLR2 NTFHPMP----DSCQWPEKMRFLNLSS--TGIRVV-----KTCIP---QTLEVLDVSN  
 MdTLR2 NNLDSMP----DSCQWPGKLYLNLS--TKTYTV-----TSCIP---QTLEILDVSN  
 chTLR2 NNFG EIP----DMCEWPEKLYLNLS--TQIPKL-----TTCIP---STLEVLDVSA  
 XtTLR2 NNFGELS---TSTCQWPKSLKYLNISS--SQMSNI-----TCIP---PTLQILDVSS  
 fTLR2 NGYSSMP----LGCSWPSSLRYLNMSG--TRIASI-----SPCLP---AALEVLDLSN  
 halTLR2 NfySSMP----GSCSWPSTLRYLNISG--AKLTTI-----TPCLP---KTLEVLDLSN  
 zebTLR2 NSFV SMP----EKCSWPVTLRFLNLSS--TKLSTL-----TPCLP---SSLTVLDLSE  
 hTLR1 NSVSYDEKK---GDCSWTKSLLSLNMSSNILTDTI-----FRCLP---PRIKVLDLHS  
 mTLR1 NSLRYS DGG---IPCAWTQSLALVNLSSNMLTGSV-----FRCLP---PKVVLDLHN  
 hTLR6 NSLESGRHK---ENCTWVESIVVLNLSSNMLTDSV-----FRCLP---PRIKVLDLHS  
 pigTLR6 NSLEYDRHG---ENCTWVGSIVVLNLSSNMLTDSV-----FRCLP---PRIKVLDLHS  
 mTLR6 NSLNSHAYD---RTCWAESILVNLSSNMLTGSV-----FRCLP---PKVVLDLHN  
 MdTLR1L NSISYDEEK---KNCSWSESLRYLNMSG--TRIASI-----FRCLP---PSITVLDLYR  
 hTLR10 NLLQHKND E---NCSWPETVVMNLSYNKLSDSV-----FRCLP---KSIQILD LNN  
 ratTLR10 NLLQHNGE---KCMWPD T L I L L N L S S N K F D G S V-----FRCLP---KSIQ T L D L N N  
 MdTLR10 NLLQHTDGN---HCHWPETL T M N L S S N K F I D S I-----FKCIP---KSIQVLDLHN  
 chTLR1L1 NLLRNSRAEG---RCQWADSLAELDLSSNQLTEAV-----FECLP---ANINKVLDLQ  
 XtTLR1L3 NGLHIDNEK---QCNWMDSLVFLNLSEGLTNSV-----FGCLP---INLQILDLSK  
 XtTLR1L1 NGLHIDNEK---QCKWMDSLVFLNLSEGLTNSV-----FGCLP---INLQILDLSK  
 XtTLR1L2 NLLAYD-EE---DCHWSQNI V L N L A S N F L T A S I-----FKCLP---ISIKILILES  
 fTLR1 NLLVYD G Q K---GCVWPQNISSMSLSSNGLTDSV-----FQCLP---ENVERLDLQ  
 tetTLR1 NRLVYD G Q G---ECYWPQNI S I L H L S S N S L T S S A-----FQCLP---TGVERLDLQ  
 tetTLR14 NKLGSAAKSL---NCVWQK S I T R F I V H H N F E S S A-----LHCLP---TSVEFLDLSF  
 fTLR14 NKLGSAAESR---NCIWQK S I T R F I V H H N F E S S A-----LHCLP---TSVEFLDLSF  
 XtTLR14 NYLGALDE---VCTWTPQITKLILKDN TLKVG V-----FKCLP---VTVEHLDMSN  
 XtTLR14L1 NSLGSNDE---MCTWTPSIRT V I L K D N M L K V G V-----FQCLP---TTVEFLDLSH  
 XtTLR14L2 NDLGVYNE---VCTWI P N I T T L I L K G N T L K M C V-----FQCLP---TSVELLDLSY  
 XtTLR14L3 NYIGSEDE---NCSWTPNIT T F I L K N N L L T P G V-----FTCLP---TTVRYLDLSN  
 XtTLR16 NGLISCSHYG---YQLEHFENLNI Q Y H F S G A P L T R-----NVNFSNIANLRSLEVEN  
 chTLR15 FPSTLTTCDIS---KNKLVLSLTKALENLESLNVSGNLI TRLEPACQLPSLTNLDSSH

: :

MdTLR7 NSLS-----FLPTGVFEGLPPNKL T L L L S K N Q I K S F N W N K L S C L Q N L E T L D L S H N L L --  
 hTLR7 NSLS-----FLPSGVFDGMPNKL N L S L A K N G L K S F S W K K L Q C L K N L E T L D L S H N Q L --  
 chTLR7 NMLN-----FLPPDVFEAMPPELKI L N L T S N R L H T F N W G K L H L L T K L I T L D L S N N L L --  
 XtTLR7 NSLT-----FVPPGVFE G M P P D L L E L Y L A R N K L K T F S W D K L H L L E K L S V L D L S N N Y L --  
 tetTLR7 NNLN-----SIQQQVFSGLPDTLSELYMTNKKLKSFAWEELYLRSLVLDLSENYL--  
 fTLR7 NNLN-----SIQQQVFSGLPDTLSELYVNNKKLKSFAWEGELSLP L S L L V L D L S G N Y L --  
 hTLR8 NRLK-----HIPNEAFLNLPASLTELHINDNMLKFFNW T L L Q Q F P R L E L L D L R G N K L --  
 pigTLR8 NNLQ-----HIPSEAFNLNPQTLELYISDNRLNFFNW S L L Q Q F P N L T L L D L S G N E L --  
 mTLR8 NNLQ-----QIPNGAFLNLPQSLQELLI SGNKLRFFNW T L L Q Y F P H L L L D L S R N E L --  
 MdTLR8 NRLH-----TIPT E A F H N L P Q S L V E L R L N N N H L R V F N W T S L Q Y F H N L T L L D L R C N S L --  
 XtTLR8 NRLS-----KIK-GELRYLPLSLTELYLNNNELVYFGW E E L Q A Y E N L K Y L D L S H N K L --  
 tetTLR8 NKIA-----KLPNDIYKYLPSNLTTLSISHNFLTDFKWEELRCLPRIQILDLSFN----  
 fTLR8 NQII-----KIPDEMYKHLPPQNLTTLII SHNFLTDFKWNKLI FL P Q I K V L D L S F N ----  
 hTLR9 NRLH-----TLLPQTLRNLPKSLQVLR L R D N Y L A F F K W W S L H F L P K L E V L D L A G N Q L --  
 pigTLR9 NHLH-----TLLPRALDNLPKSLKHLHLRDN N L A F F N W S S L T L L P K L E T L D L A G N Q L --  
 mTLR9 NNLH-----ILRPQNLNLPKSLKLLSLRDN Y L S F F N W T S L S F L P N L E V L D L A G N Q L --  
 ratTLR9 NKLR-----ILRPQNLNLPKSLTKLSFRDNHLSFFNW S S L A F L P N L R D L D L A G N L L --  
 MdTLR9 NKLR-----SLPAQALDNLPKSLRLLWAKDNHITFFNW S S L S L P H L E V L D L S R N L L G H --  
 fTLR9 NKLR-----LVSP E V L C N L P R S L Q N L S L S N N R L N Y F P W E N I S V L S N L R H L D L S Q N F I --  
 tetTLR9 NKIR-----LVSPKVL C N L P T S L Q N L S L S N N R L T Y F P W E N I S A L T N L H H L D L S Q N F I --  
 XtTLR9 NQLP-----VIPNEVLEKLPESLQKLNLSHNKLYTFNWAKTAHLGNLAIIDLGFNAL--  
 mTLR3 NGLD-----EIPVGVFKNL-----  
 hTLR3 NGFD-----EIPVEVFKDL-----  
 MdTLR3 NGFD-----EIPSDVFKGL-----  
 chTLR3 NGFD-----EIPVHVFKGL-----  
 XtTLR3 NGFD-----EIPANAFKGL-----  
 fTLR3 NGLD-----EIPAGALRGLR-----  
 tetTLR3 NGLD-----EIPAEALRGLT-----  
 zebTLR3 NGID-----EIPNFAFRGFs-----  
 cfishTLR3 NGLD-----EIPMKAFQGLS-----  
 hTLR5 NYLN-----SLPPGVFSHL-----  
 mTLR5 NYLN-----FLPPGIFNDL-----  
 MdTLR5 NYLN-----FLPPDVFSDL-----  
 XtTLR5 NLLR-----YLPNGIFNGL-----

XtTLR5 NFLR-----YLPDGIFNGL-----  
fTLR5 NSLE-----SLPQGIFAGL-----  
tetTLR5 NFLE-----KLPLGVFSGL-----  
troutTLR5 NSLQ-----APPDGIFKGL-----  
mTLR13 TKD--GDRSLYLNASLQNLK-----  
ratTLR13 TKD--GDRSLYLNSSLQNLK-----  
MdTLR13 TKA--GNRGLYLNISLQKLG-----  
XtTLR13 TVYTMTPPISFEKELFKKLG-----  
chTLR21 SSN----GLHDLDPGIFRNLG-----  
XtTLR21 DCN----GIQRLPPGIFKLNK-----  
fTLR21 CCV----GPTHLPAAGIFKDLT-----  
fTLR23 TDLS-----DLDPFMRPPI-----  
tetTLR23 ADLS-----DLDPFMRPPTA-----  
fTLR22 NEFQ-----DLSPALFHPPI-----  
tetTLR22 NDFT-----DLPPDLFHPPI-----  
halTLR22 NELM-----DLSPDLFSPPI-----  
troutTLR22 NEFT-----ALTPKLFHPPT-----  
XtTLR22 NPIK-----ILDPPFLFRNVP-----  
mTLR12 LQSITQ-PRSVQLEELVGLD-----  
mTLR11 LNFFYE-SSTMKLEMLLKEVP-----  
hTLR4 CQLE-----QLSPTAFNSLSS-----  
rabbitTLR4 CQLE-----QVYQGFESLPR-----  
pigTLR4 CQLE-----QVSQRAFHSLPR-----  
mTLR4 CQLE-----QISWGVFDLHR-----  
MdTLR4 CQLE-----RVSQETMSPLHQ-----  
chTLR4 CKLV-----WVDQSTFNALSE-----  
XtTLR4 CSLE-----FIPKGTFLSLKV-----  
zebraTLR4 CGIE-----KVSMSRSTGTQK-----  
hTLR2 NNLN-----LFS----LNLQP-----  
rabbitTLR2 NNLN-----VFS----LTLPR-----  
pigTLR2 NNLN-----SFS----LSLPQ-----  
mTLR2 NNLN-----SFS----LFLPR-----  
MdTLR2 NQLS-----DFN----LNLPH-----  
chTLR2 NNLQ-----DFG----LQLPF-----  
XtTLR2 NYLT-----VFT----IKMPN-----  
fTLR2 NDLK-----DFV----LVLPT-----  
halTLR2 NDLQ-----GVT----VALPA-----  
zebraTLR2 NDLK-----AFK----QRFPH-----  
hTLR1 NKIK-----SIPK-QVVKLEA-----  
mTLR1 NRIM-----SIPK-DVTHLQA-----  
hTLR6 NKIK-----SVPK-QVVKLEA-----  
pigTLR6 NRIR-----SIPK-DVAHLEA-----  
mTLR6 NRIM-----SIPK-DVTHLQA-----  
MdTLR1L NKIK-----SIPK-NISNLES-----  
hTLR10 NQIQ-----TVPK-ETIHLMA-----  
ratTLR10 NKIR-----AVPK-EIYYLKS-----  
MdTLR10 NDIR-----TIPR-EIENLKA-----  
chTLR1L1 NQIA-----NVPK-GITELHS-----  
XtTLR1L3 NQIS-----SIPI-EVKNFVS-----  
XtTLR1L1 NQIS-----SIPI-EVKNFVS-----  
XtTLR1L2 NDIT-----HVPS-GVTHLDD-----  
fTLR1 NQIS-----AVSS-STLGLVR-----  
tetTLR1 NQLS-----VVSS-STLKLKR-----  
tetTLR14 CELD-----QLDMQYFSKTSQ-----  
fTLR14 CDLD-----QLDMNYFSKTSN-----  
XtTLR14 SLLE-----RLDMDYFNRAK-----  
XtTLR14L1 SQLE-----QLDMDYFNKATN-----  
XtTLR14L2 SQLE-----QLDLNYFNRAK-----  
XtTLR14L3 SRLE-----SLDMDYFSNATN-----  
XtTLR16 LATALDPN--VPPNDLFHKLHK-----  
chTLR15 NLIS-----ELPDHLGQSLLM-----

MdTLR7 -SRVPEVLSNCSRSLLKLLSYNQIHQLTKNFLQDAFQLRYLDLSSNKLRIQKSSFPEN  
hTLR7 -TTVPERLSNCSRSLLKLLKNNQIRSLTKYFLQDAFQLRYLDLSSNKIQMIQKTSFPEN  
chTLR7 -TTVPRKLSNCTSTLQELILRNNRITRI TKYFLRGAIQLTYLDLSSNKIQIKKSSFPEN  
XtTLR7 -TTVPRELSNCTSSIKKLLSNKIKKLTFFFLRGSVSLKYLDLSDNLIQNIHSSFPED  
tetTLR7 -TTVPRILSNCSKSLNKLILHKNQILKLTNPFLEYAYNLKYLDLDFNHIQIEKSNFPDD  
fTLR7 -TTVPHMLSNCSKSLKLLILHKNKILKLTNPFLEYAYNLKYLDLDFNRIQIEKSNFPDD  
hTLR8 -LFLTDSLSDFTSSLRLLSHNRISHLPSGFLSEVSSLKHLDLSSNLLKTINKSALETK  
pigTLR8 -SFLTDSLKFTSLQTLILRQNRISYLP SGLLSEASSLTHLDLSSNQLKMNISKLHAK  
mTLR8 -YFLPNCLSKFAHSLTLLSHNHFSHLPSGFLSEARNLVHLDLDFNTIKMINKSSLQTK

MdTLR8 -FTIKPDL--YESSVQTL LLGKNI ISHLPDGLFSKAKNLYHLDLSYNLIKMVNKSTFHMK  
XtTLR8 -TMIMGNLSIHTYSLSSLIISYNSISSLPVAF LHKARNLSELDLSFNHLKSINSSVLLSG  
tetTLR8 -YLTNVT--DVAPTLTFLD LTHNRIFHLNDGFLK GAKRLRALSLKANQLTTINASTFQPR  
fTLR8 -RLTNVTGIHIAHTLTL LN LKHNGI SHLDDGFLMGAKRLQV LNLKSNQLTTINESTFQPR  
hTLR9 -KALTNGSLPAGTR LRRLDVSCNSISFVAPGFFSKAKELRELNLSANALKTVDHWSWFGP-  
pigTLR9 -KALSNGSLPSGTQLRR LLDLSGNSIGFVNP GFFALAKQLEELNLSANALKTVEPSWFGS-  
mTLR9 -KALTNGTLPNGTLLQKLDVSSNSIVSVPAFFALAVELKEVNLSHNLKTVDRSWFGP-  
ratTLR9 -KALTNGTLPNGTLLQKLDVSSNSIVSVPAFFALAVELKEVNLSHNLKTVDRSWFGP-  
MdTLR9 -TSSLATGRLPNGSRLHTLR LSRNSIRFIALGFFALATELKVVDLSGNALKTVVRGWFGG-  
fTLR9 -SFLPYTVVHAAEPLSLLDL SHNRIGYVPRSFFLAMNSLQRLYLSHNQLKQLNQHF LPA  
tetTLR9 -TFLPHIVI QAPASFL LLDLSHNRINYL PQSFFRAMNSLRRLYLSHNQLKQFDHQL--AL  
XtTLR9 -TKLRANL TES--NIAFLNLTYNKINS LDKDFD SFSSELKQLILSNNLKI THITSFPI N  
mTLR3 -----FELKSI NGLGNLNLKLEPFIFDDQTS LRSNLQKNLIT SVEKDVFGP-  
hTLR3 -----FELKIIDLGLN LNLTPASVFN NQVSLKSLNLQKNLIT SVEKKVFGP-  
MdTLR3 -----FQLRAIYLGLN LNLPLASLFDHQ TSLKSLSLQKNLIT SVEKGLVFGP-  
chTLR3 -----HQLKDDLGLSNNLNL L PATLFD DQTS LNTLNLQKNLIT SVEENVFGP-  
XtTLR3 -----CKLKVLDIGENNVYIL PPSVFD DQHS LTLDLHKNLIT SVEQDLFKN-  
fTLR3 -----ELQELSLGNL LNSLRPSVFD DLSLRALFLQKNVIT SVRPEVFET-  
tetTLR3 -----ELQELSLGSN LNSLRDSVFN DLTSLQALYLEKNMLT TSVKFKT-  
zebTLR3 -----ELHEL SLRGNL LLDQLHASVFD DLSLKYLHLQKNLIT SVQRATFGV-  
cfishTLR3 -----KLKYLISGN LNLNLFHDSIFDNL RSLRFLRLQKNLIT SVRRETFGV-  
hTLR5 -----TALRGLSLNSRNL TVLSHNDLPAN--LEILDI SRNQLLAPNP DVFVS-  
mTLR5 -----VALRMLSL SANKLTVLSPGSLPAN--LEILDI SRNQLLCPND PFFSS-  
MdTLR5 -----TALQILSLDGNK LISLSPGVLPEN--LRVLSL SQNHLLSPDPTVFAS-  
XlTLR5 -----DSLQTLN LSSNLLTYLIPGI FPTN--LDTVDLSKNQLYSPNPKLFLS-  
XtTLR5 -----ESLQTLN LSSNLLTHLMPGVFPTN--LDTVDLSKNQLYSPSPKVFLS-  
fTLR5 -----SSVHEIDL SFNALT YLQSDVFP TS--LAILHILGNFLSPDPGIFQT-  
tetTLR5 -----SSIQEIDL SFNALT YLPSDGF PAS--LSILHIAGN FLASPEPGILRS-  
troutTLR5 -----ISLEEMDL HFNSLTYLQDIF PES--LKTVDLSYNFLASPDPEAFHS-  
mTLR13 -----RLKILRL ENNLES LVPDMFSS LQSLQVFS LRFNNLKVINQSHLKNL  
ratTLR13 -----RLKVLRL ENNLES LVPGMFSS LQNLQVFS LRFNNLKVINQSHLENL  
MdTLR13 -----QLKSLQLENNL DSLAPEMFFGLEGLQIFSLRFN NLKIINQNLQNL  
XtTLR13 -----QLRNLTL DNNGIQFLPE DVF TNPML EHLISLRYNRLTNI SEDILKNV  
chTLR21 -----NLRFLDLE NAGLHSLTLEVFGNLSRLQV LHLARNE LKT FND SVASRL  
XtTLR21 -----NLQILDLE NIKLQYMRMEV FSSLTNLK RLLLTKNAL THINIKVFENM  
fTLR21 -----NLTILTVENMGI QNLSTEVFGNISQLKKIQLNHNVMQTFPVTVLQSL  
fTLR23 -----DLQSLDLSGTQISSLEF LLQVDFSSLRDLRLCDNDIT SINHTL FQFL  
tetTLR23 -----ELQSLDLS DTRISSLEF LLRVNLSSLRNLTLRDNALVVVNH TFFRFL  
fTLR22 -----DVRSLYISRISL RSLDFIKKAKLDQLEFLQARRNVFSVSEDVVEAL  
tetTLR22 -----QVRSLYISRISL RSLDFIKKAKLDQLEFLQARRNVFSVSEDVVEAL  
halTLR22 -----NLKSLYVSR TNLRS LDTGANLTKLEFLQARKNEFSIISEEIIKSV  
troutTLR22 -----SLNRLYL PKARLQSLDFLKGANLSRVTF LQVRKNDITAVNETVLQSL  
XtTLR22 -----HLTELHISKTRMESLDFLILSNLTHL KLLRAVDSQLNSLFTSQGAA  
mTLR12 -----QLQALVLSSTGLKSL SAAAFQRLHSLQV LVLVEYKDLMLQDSLREYS  
mTLR11 -----QLQVLA LSHLNLRLSVSSFKSLQDLKLLLFNSERALEMNSNLQEFI  
hTLR4 -----LQVLNMSHNNFFSLD TFPYKCLNSLQVLDYSLNHIMTSKKQELQHF  
rabbitTLR4 -----LES LNMSHNNLLVLD TLT YKCLYSLQVLDLSFNHIGNITPEGQHF  
pigTLR4 -----LQVLNMSHNRLLFLD TLPYKPLHS LRLDCSYNLIVASKEQELQHL  
mTLR4 -----LQLLNMSHNNLLFLDSSHYNQLYSLSTLDCSFNR IETS KG-ILQHF  
MdTLR4 -----LQVLDLSH NKLQTFDPFICMPL LNLQV LNCSSNSITALNGENLQEL  
chTLR4 -----LKELIISNRKLLTFDPV TYKPLQAL TALDFSNQMSFLSDALEIL  
XtTLR4 -----LNVNLNSKNKLLDLQTSMLIPLSNLISL DLNFNQFKVSDNSIRSL  
zebTLR4 -----LRHLYSRNKLMVLD FLTQPELTHLTSVYIDKNSITTIPLDVLQKL  
hTLR2 -----LKELYISRNKLM TLP--DASLLPMLLV LKISRNAITTF SKEQLDSF  
rabbitTLR2 -----LKELYISRNMLK TLP--GASLLPMLLV M KISRNSINTFSKEQLESF  
pigTLR2 -----LKELYISRNKKTLP --DASFLPMLSVLRISRNTINTFSKEQLDSF  
mTLR2 -----LQELYISRNKKTLP --DASLFPVLLVMKIRENAVSTFSK DQLGSF  
MdTLR2 -----LKELYLSKNKKTLP --DAAHFPHLVVMNISQNTLYTFSKAQLESF  
chTLR2 -----LKELYLTKNHLK TLP--EATDIPNLVAMSI SRKNLSFSKEEFESF  
XtTLR2 -----LTELYISNRLSKLP --EGMYFPRLFMLSIDRNKLNDFYQSDLDLF  
fTLR2 -----LRELHLSGNKLLRLP --PGWFFPNLNTLTIQSNLSMFGPSELRTY  
halTLR2 -----LRELRLSGNKLLRLP --PGSWFFPNLQTLTVQSNLTMNMFDRSDLRSF  
zebTLR2 -----LTTLLITGNRLMKLP --DGKLFPSLNTLLIQRNALRMFNQSSLRSF  
hTLR1 -----LQELNVAFNSLTDLP -GCGSFSS-LSVLII DHNSVSHPSADFFQSC  
mTLR1 -----LQELNVA NSLTDLP -GCGAFSS-LSVLVIDHNSVSHPSADFFQSC  
hTLR6 -----LQELNVAFNSLTDLP -GCGSFSS-LSVLII DHNSVSHPSADFFQSC  
pigTLR6 -----LQELNVA NSLAHLP -GCGSFSS-LSILSIDYNSI SNPSADFFQSC  
mTLR6 -----LQELNVA NSLTDLP -GCGAFSS-LSVLVIDHNSVSHPSADFFQSC  
MdTLR1L -----LQELNIAFNFLVDLP -GCSTFSS-LSVLII QHNSVSHPSAHFFNSC  
hTLR10 -----LRELNIAFNFLTDLP -GC SHFSR-LSVLNIEMNFI LSPSLDFVQSC  
ratTLR10 -----LRELSIAFNFLTDLP -GCDHFQK-LSSLNIE MNLI LSPSLDFVQSC  
MdTLR10 -----LQELNIA NSLTDLP -GCRNFQR-LSALNVE MNSI LSPSLDFVQSC



pigTLR4 PRS---LAFNLTKNDFSCACEHQTFLOWVKD---QKQLLVG---AEQMVCTQPLEMQD-  
 mTLR4 PKS---LAFFNLTNNSVACICEHQKFLQWVKD---QKQFLVN---VEQMTCATPVEMNT-  
 MdTLR4 SRT---LISIDLSDNPFDCVCDHQIFQWVKE---HTHLLNR---SKPMTQTPSHMKD-  
 chTLR4 PDS---LVLLDISHNLFECSTHLNFKWVKE---KQDLLRN---KHSMICHTPAYMKN-  
 XtTLR4 PSS---LAKVDLSGNPFDSCWQIIFLLWVQQ---QKDKLLK---QSYQMFCKTPNTLNG-  
 zebTLR4 PMN---LSEFDLSSNSIDSCSQTDFFILWIIQ---KQNILKQ---LENIRCKTFSANTD-  
 hTLR2 HT---LKTLEAGNMFICSCDFLSFTQEQ---QAL-AKVLIDWPANYLCDSPSHVRGQ  
 rabbitTLR2 QK---VTALEAGNMFICSCDFLSFTQEQ---PAL-TRVLPDWPEYSLCDSPSHVRGQ  
 pigTLR2 QK---LKTLEAGNMFICSCDFLSFTQEQ---QAL-AQVLSDWPENYLCDSPSHVRGQ  
 mTLR2 PK---LETLEAGDNHFCVSCCELLSFTMET---PAL-AQILVDWPDYSLCDSPRRLHGH  
 MdTLR2 QT---TEILAAGNMFICSCDFLSFVHHEQ---TLL-VKVLTDWPGGYLCDAPFQVRGQ  
 chTLR2 KQ---MELLDASANNFICSCDFLSFIHHE---AGI-AQVLVGPESYICDSPLTVRGA  
 XtTLR2 PQ---LTTLDGRDNMYLCSQFLSFMHSH-----TIALVGVPPDDYICDSSSVRGG  
 fTLR2 SR---LQSLQAGWNKFCVCTCDFVGLFQSGV---KVG-SVQLTDREDDYICDAPLRLQGA  
 halTLR2 PR---LQNLAQAGQNFVCTCDFVGLFQSSII---RGDEDVRLTDGEESYICDSPFLRGE  
 zebTLR2 KT---LLYLEAGANNFVCSCKFVSFFKDV---EDL--ITLQDGRQNYVCNTPFTLRGN  
 hTLR1 QK---MRSIKAGDNPFQCTCELGEFVKN---IDQVSSVLEGEWPDYKCDYPESYRGT  
 mTLR1 QN---IRSLTAGNPFQCTCELRFVKN---IGWVAREVVEGEWPDYRCDYPESSRGT  
 hTLR6 QK---MRSIKAGDNPFQCTCELRFVKN---IDQVSSVLEGEWPDYKCDYPESSRGS  
 pigTLR6 QK---IRSLKAGNPFQCTCELRFIQS---LGQVSSDVESWPDYSECEYPEYKGT  
 mTLR6 QN---IRSLTAGNPFQCTCELRFVKN---IGWVAREVVEGEWPDYRCDYPESSKGT  
 MdTLR1L QN---IKSLQAEDNPFCTCELREFSKN---MATLSSQVVGWPHSYKCAFPDNYKGT  
 hTLR10 QE---VKTLNAGRNPFRCTCELKNFIQ---LETYSEVMVGVWSDSYKCDYPLNLRGT  
 ratTLR10 QE---VKTLNAGRNPFRICEFRDFIW---LEKHSKGLMSGWPDYACEYPLSLKGT  
 MdTLR10 QE---VQSLKAGDNPFRCNCDLRFNFIN---LEKKSQGLMIGWPDAYTCEYPLELKI  
 chTLR1L1 PS---VKELQAGQNPFCSCCELQDFLR---LERQSGKLSGWPEAYVCKYPEDLSGT  
 XtTLR1L3 EY---VQYLSAGKNPFQCNCDLREFVK---MGVMFPKRLIGWPEYKCADPENLRGI  
 XtTLR1L1 EY---VKYLSAGKNPFQCNCDLREFVK---MGVMFPKRLIGWPEYKCADPENLRGI  
 XtTLR1L2 SR---VKHISAGQNPFCNCDLRRFIN---QEKEAPGTLIGWPEAYVCKYPDHLRGT  
 fTLR1 RS---LKTLDASSNPFCTCDLIGFIQLGLKFEKGAAVTFLQWPHGYCYCYPEAVRDS  
 tetTLR1 PR---LKTLDVSYNAFMCICPLRGFIRLGLSEKNRTGVTFLLQWPPQGYCYCYPEAFKDS  
 tetTLR14 PL---LSYLRAGNPNYHCTCELHAFVQETI---TKDKINLTDWPNYKCYHPEPLLNT  
 fTLR14 PR---LSHLSAGNPNYHCTCELHAFVQETI---TEGVNLTDPWPNYKCYHPEPLLNT  
 XtTLR14 PE---LRRLTAGDNPNYHCTCDLYAFFTETL---TERRVSLADWPEYNCYHPPHLLDT  
 XtTLR14L1 PK---LRNLTAGDNPNYGCCTDLYRFFSQIR---EEGRIVLADWPQAYKCYSPDLDLDT  
 XtTLR14L2 PS---LRRLTAGNPNYDCTCDLYAFFSTLQ---NNDLMLADWPYDYQCFHPQHLRDT  
 XtTLR14L3 PQ---LRRLTAGNPNYHCTCDLYSFFSDVL---GKNKITISDWQSYCYHPPQLRNT  
 XtTLR16 SP---LEFIYFIDVTFQCDLNSWVFTWALE-----DKHTFVSGICSLFCLQLNKK  
 chTLR15 TS---LSVLTVQGHKHFVFNVIYIR-----NPHLQINGKDDLRCSEFPDRRGS

\* \*

MdTLR7 -SLIKLNL-----YTCELDLINSILYMTSMFIIILCLMVIPIVASHLYFWDWMSYHF  
 hTLR7 -SVISLDL-----YTCELDLTLNLIILFSLISVSLFLMVMMTASHLYFWDVWYIYHF  
 chTLR7 -SLVFLDL-----NTCELDTSYFIMYALSTSAVLCMMFAVMSHLYFWDVWYSYHY  
 XtTLR7 -SLVLLDL-----YTCEQYHLNLIILQALSASFIIICLMVSVSSHLFYWDFWFIYHL  
 tetTLR7 -PVVSVDL-----SACQHNYLSIILYILMTSFIITFFTLSSISHLFLWDIWIYHF  
 fTLR7 -PVISVDL-----LACQHNYLSIILYFLMTSFTLIFFTLAISSHLFLWDIWIYHF  
 hTLR8 -SIVSLEL-----TTCVSDVTAVILFFFTFFITTMVLAALAHHLFYWDVWFIYNV  
 pigTLR8 -SIVSLEL-----TTCVSDTIAAIICTFFFTVSTVLAALAHHWFYWDWFIYHV  
 mTLR8 -SIMSLDL-----TTCVSDTTAAVLFFLTFTSMVLAALVHHLFYWDVWFIYHM  
 MdTLR8 -SIMELEL-----TTCVSDLTAIISFFFSFIITVTMTVMATFHHFYWDIWIYHL  
 XtTLR8 -GIIYFDV-----HTCDLDGAAMILYFFSVFLVMSITVLPILINVFSWDLWYVYHL  
 tetTLR8 -ILIRFDI-----TQCVNNSKAFVYILSSSLVIFMLVTTVAHLFYWDFSYVIHY  
 fTLR8 -VLIKFDI-----TQCVNNSKAFVYILSSSLVIFMLVTTVAHLFYWDATYVLHY  
 hTLR9 -SIFAQDL-----RLCLDEALSWDCFALSLLAVALGLGVPMLHHLCGWDLWYCFHL  
 pigTLR9 -SIFAQDL-----RLCLDETLNCFGILLSLALAMALGLVVPMLHHLCGWDLWYCFHL  
 mTLR9 -SIFAQDL-----RLCLDEVLSWDCFGLSLLAVAVGMVVPILHHLCGWDLWYCFHL  
 ratTLR9 -SIFAQDL-----RLCLDDVLSRDCFGLSLLAVAVGTVLPPLQLHCGWDLWYCFHL  
 MdTLR9 -SIFLEDL-----HSCQDPVLACSCFALSLLGTLTLALATLQRLFQWDLWYIFHL  
 fTLR9 -TILSMDQ-----RSCQDIYGNLASVVCFLVIGF-TVLPPLKHLYGWDLWYSLQV  
 tetTLR9 -AMLSMDQ-----PSCQDMYGLASVICFLVAF-TLLPPLKHLYGWDLWYSLQV  
 XtTLR9 -SLLSMDP-----QSCQELYGHVCFIWSILVIFL-MVIPTIWNLFWNWLYAGHL  
 mTLR3 -PLKLFDT-----SSCKDSAPFELFLIISTSMLVFLLVLLIHFEGWRISFYWNV  
 hTLR3 -PVRLFDT-----SSCKDSAPFELFFMINTSILLIFIFIVLLIHFEGWRISFYWNV  
 MdTLR3 -PVMLFDI-----SPCKDSAPFKMFFIINASFCLTIFVLLVHFQGWRIAFYWNI  
 chTLR3 -LVLHFDI-----SACKDSAPFKLLFLITTTAVMQFMFIVLLIHFEGWRIFAFYWNI  
 XtTLR3 -PVDTFDS-----SPCKELAPFR-LFVSTFSLMLVFLSLLIHFQGWRIAFYWNI  
 fTLR3 -SIMTFDP-----LSCKDMTPFRALYVVSSTTVILLTVALFMRFHGWRIAFYWNI  
 tetTLR3 -SIMVFDI-----LSCKDMTPFKALYILSSTAVLMLLFIISFLVHFQGWRIAFYWNI  
 zebTLR3 -SVMNFDI-----LSCKDMTPFKALYILSSTAVLMLLFIISFLVHFQGWRIAFYWNI  
 cfishTLR3 -SVLDFNP-----ESCKDLVPFQALYVITSSLVGLMLVLAFLVHFQGWRIAFYWNI  
 hTLR5 -SLFSL--TEGCD--EEVVLKSLKFLSIVCTVTLTLFLMTILTVTKFRGFCFI-KT

mTLR5 -SLYNIS--TEDCD--EEEAMRSLKFSLFILCTVTLTFLVITLVVIKFRGICFLCY-KT  
MdTLR5 -SLYSIS--TEGCD--EEEALQFIHFSLFIFFTTTLTVFLTAVVTFTRFRGCCFLLWRKM  
XtTLR5 -PLHVLE--EGDCD--ESEALTTLMFSLFVFLNATIILIGMSTVVVYTHYRGFCFVMY-KR  
XtTLR5 -PLHILT--VENCDD--DDKVLMLPMFSLFVLTSTTILVLMSTVVVYTHYRGFCFATY-KR  
fTLR5 -PLLNYSRTVEACEVDDEESTHGLRFALFVFTAGLVITAVLCAAYARLRGRIFVAY-KK  
tetTLR5 -PLLSYSRSMEPCEVDDEESTRGLRFALFVLTSSLVTAAVLCAAYARLRGHIFIVY-KK  
troutTLR5 -SLLNFS-SVISCEEDDERLVQELRSLF IGCTALIILIMVGSIFFTRLRGFLFKVY-KK  
mTLR13 -LLIDFDD-----AMCNFDLGVYFLCSFSMVLSTMVFSWFSKMIASLWYGLYI  
ratTLR13 -LLIDFDD-----AMCNFDLGVYFLCSFSVVLSTMVFSWFSKMIASLWYGLYI  
MdTLR13 -LLVGFDT-----SICNFDTGKICFFCSFSLVLAATMVCWSWFGTKMISSMRYGIYM  
XtTLR13 -MLFENQD-----FSFCTNTGYFFLGSFIIITFSLLTVNLLVVKWTVRYMYCM  
chTLR21 -YIHSFDT-----HVCFLDLGLYLFAGTAPAVLLLLVVPVYHRAWRLKYHWYL  
XtTLR21 -YFHDFDT-----HVCDMEIKIKLFCSSFTSILFIIPIVYKFFYWMIKYNYFL  
fTLR21 -KFFNFDT-----SVCNIDLGGYLFCTAPWIFLFTVWPLLYVKLYWKIKYSAFV  
fTLR23 -NLLDFEV-----QFCWIDVDFLFCFLSSTCLVVLTLTSTFTYHFLRWQLTYAYHL  
tetTLR23 -KLLDLDV-----HLCWVDLNFCLFSTLVLVLMVASFTYHLLQWHLLYAYHL  
fTLR22 -KLLDLDT-----QSCVTNTDFICFISTTCTILFMMAMSFTYHFLRWQLTYAYYF  
tetTLR22 -KLLGLDT-----QSCVINTDFICFVSTTCAILLMAASFAYHFLRWQLTYAYYF  
halTLR22 -KLLHFDI-----RSCSVDAGFLMFLSTTCTTLFMLTSTFTYHFLRWHLAYAYYF  
troutTLR22 -KLLDVEL-----QFCTVDLGLYYYISTTCLVLLTLIASFAYHFLKWEVIYGYL  
XtTLR22 -KLSTFNL-----SSCRLDYSFIFFLTSTLFTITFIISATVWVNRWVHVIYAYYI  
mTLR12 -GSLPSFLW-----DHCPQTLELKLFLASSALVFMIALPLLQEARNSWIPYQLAL  
mTLR11 -TLLFSFLA-----TNCPHDVFGLFGLTFSFILLLLIILPLISCPKWSWHLHLWTL  
hTLR4 -MPVLSLN-----ITCQMKN-TIIGVSVLSVLSVSVVAVLVYKFFYH---LMLL  
rabbitTLR4 -MPVLSFTN-----ATCQISK-TIISVSVFSLVSVFAVVLVYKFFYF---LMLL  
pigTLR4 -LPVLSFRN-----ATCQISE-AVISASVLTFLVSVAGILVYKFFYH---LMLL  
mTLR4 -SLVLDENN-----STCYMYK-TIISVSVISVIVVSTVAFLIYHFFYH---LILL  
MdTLR4 -ISVQLFDD-----STCHMKK-TVIAVSLGIIIVILLVLAALVYKFFYH---LMLL  
chTLR4 -MSLSNFDM-----SSCHPNP-TTVACSVTVLLAAGVFLFLIYKYFQLYYSVLVLL  
XtTLR4 -LPLTDFTP-----NCSMT--ALISETVLGILCPSLIAITG-----KLIC  
zebTLR4 -FKATDFDI-----DYCVHKKRLTIVLSVICVTFVVVLAAILLYKFWFYVQYCFILF  
hTLR2 -QVQDVRL-----SVSECHRTALVSGMCCALFLLILLTGVLCRHFHGLWYMKM  
rabbitTLR2 -QVQDARL-----SVSECHRAAVVSGVCCALLLTLAVVLCRHFHGLWYMKM  
pigTLR2 -RVQDTRL-----SLTECHRAVAVSVVCCALFLLLLLTGALCHHFHGLWCMKM  
mTLR2 -RLQDARP-----SVLECHQAAALVSGVCCALLLILLVGLCHHFHGLWYLRM  
MdTLR2 -RVQDVQL-----SFSECYRVELVAAICSSLFLLALLAGVLCYQFHGIWYMKM  
chTLR2 -QVGSVQL-----SLMECHRSLVSLICTLVFLFILILVVVGYKYHVVWYMRM  
XtTLR2 -RIQDANL-----PPLVCHKTLIVTLSCILLIALVAAIAALCHFLHVWVYAKM  
fTLR2 -LVARVRL-----PLVHCHPVQVVSASCVVALLATAALGTLWVHVAFLWYLRM  
halTLR2 -PVGQIYL-----SFVLCRDLFVSLCCGVALVVGILVLCVLLWRLHALWYLRM  
zebTLR2 -AIDSURL-----SVFECYMI PAVSVLCFGIITAGLVVLTCHKLHVIWYLQM  
hTLR1 -LLKDFHM-----SELSCNITLLIVTIVATMLVLAVTVTSLSYLDLPWYLRM  
mTLR1 -ALRDFHM-----SPLSCDTVLLTIVTIGATMLVLAVTGAFCLCYFDLPWYVRM  
hTLR6 -PLKDFHM-----SELSCNITLLIVTIGATMLVLAVTVTSLCIYLDLPWYLRM  
pigTLR6 -LLKDFRV-----SELSCNTALLIVTIGVTGLALALMTGLCVYFDLPWYLRM  
mTLR6 -ALRDFHM-----SPLSCDTVLLTIVTIGATMLVLAVTGAFCLCYFDLPWYVRM  
MdTLR1L -HLKDFHL-----SPLSCNIVLLITIVIVVVLVVFVIVTTFVCYVFDLPWYLRM  
hTLR10 -RLKDVHL-----HELSCNTALLIVTIVVIMVLVGLAVAFCLHFDLPWYLRM  
ratTLR10 -PLKDVYL-----PELACNTLLIVTIVLVILVGLVVAFCILKFDMLWYLRV  
MdTLR10 -HLENVDL-----PALSCNTPLLIIVAVILIGLLWTVVIAIALCIRFDLPWYLRM  
chTLR1L1 -QLEDFHL-----TELACNTLLLVLTALLLTLVLA VAVAFPCIYLDVWPYVRM  
XtTLR1L3 -FLQDFYL-----PEISCNISMLLGVVLGTIFILSIIIVVSACFYFDVPWYIRM  
XtTLR1L1 -FLQDFYL-----PEISCNISMLLGVVLGTIFILSIIIVVSACFYFDVPWYIRM  
XtTLR1L2 -MLKDFYI-----SEITCNVFIIPVILPIIISIALIIGLCKYLDGPPWFLKM  
fTLR1 -NLNNFWI-----PEISCNSYLLAAAILCPAVVMTVVLTLCRHFDPWYLRM  
tetTLR1 -NLNNIWI-----SEISCNTGLLAAAILCPAVVTISVVLMLCRHFDPWYVGM  
tetTLR14 -VISQYLP-----GKVACDIRLVIVICVAATTFVVLILVLIICYIFDLPWYTKA  
fTLR14 -VISQYLP-----GKVACDIRLVIVICVAATTFVVLILVLIICYIFDLPWYTKA  
XtTLR14 -KVEFYNP-----GRVECDVRLVVAISVSTTAVVVMLCMLCWRFDVPWYLRM  
XtTLR14L1 -KVEFYNP-----GKVQCDVRLVVAISVSTTAVVVILSMLLWRFDVLWYVQT  
XtTLR14L2 -DVEDYTP-----WRVECDVSLVITISVSTTAAIILCMLCWRFDVPWYLRM  
XtTLR14L3 -RVDIYTP-----GSIECNVGLLVAITVSTTAVVVIAACMIMCWRLDAPWYFRM  
XtTLR16 -FNLVNFSE-----SSCRQEIFMFLFVITFTSLLFLVLTMLCNIFNSDIQLFVY  
chTLR15 -LVKSSN-----LTLHLCSLGIQMAITACMAILVVLVLTGLCWRFDGLWYVRM

MdTLR7 CKAKLKGYQRLI-----SPQFCYDAFIVYDTSDPKVVVEWVFKELVENIESQGD  
hTLR7 CKAKIKGYQRLI-----SPDCCYDAFIVYDTKDPVTEWVLAELVAKLEDPRE  
chTLR7 CTAKLKGYYRIP-----LPDACYDAFIAVDNTDLAVNEWVMTLVEKLEDQKA  
XtTLR7 FKAKIHGYKRFP-----KCCYDALIMYDTKDSAVSDWVFNLDLVNILEKQGN  
tetTLR7 CRAKLGYNRLY-----SQSSVYDAFMVYDKEDPAVSEWVMKEMCVQLEGRED  
fTLR7 CRAKLGYSQLS-----SQSSVYDAFVYDKEDSAVSEWVMKEMCVQLEGRED

|            |                                                              |
|------------|--------------------------------------------------------------|
| hTLR8      | CLAKVKGYRSLN-----TSQTFYDAYISYDTKDASVTDWV INELRYHLEESRD       |
| pigTLR8    | CLAKVKGYRSLP-----TSQTFYDAYVSYDTKDASVTDWVMNLRFLHLEESRG        |
| mTLR8      | CSAKLKGYRTSS-----TSQTFYDAYISYDTKDASVTDWV INELRYHLEESRD       |
| MdTLR8     | CSAKIKGYKSLS-----TSQTFYDAFVAYDTKDTCVTDWV INGLRFQLEENED       |
| XtTLR8     | CVAKLRLHKVCK-----SECLYDVFITYDNKDPNVNDWI FNELCQHLEDKGD        |
| tetTLR8    | MKARIKGYRSLN-----SPDILYDAFVTYDTRDPHVSEWVMKNLLAKLEEEGE        |
| fTLR8      | MKAKLKGYSSLN-----SSEILYGAFVTYDTRDPHVSEWVMKNLLVKLEEEGE        |
| hTLR9      | CLAWLPWRGRQSG-----RDEDALPYDAFVVFDDKTSQSAVADWVYNELRGQLEECRG   |
| pigTLR9    | CLAWLPHRGQRRG-----ADALFYDAFVVFDDKTSQSAVADWVYNELRVQLEERRG     |
| mTLR9      | CLAWLPLLARSR-----RSAQTLPYDAFVVFDDKTSQSAVADWVYNELRVLEERRG     |
| ratTLR9    | CLAWLPLLTRGR-----RSAQALPYDAFVVFDDKTSQSAVADWVYNELRVLEERRG     |
| MdTLR9     | GLSWLPWRAWQKR-----KAPAQAYDYDAFVVFDDKTSQSAVADWVYNELRVLEERAG   |
| fTLR9      | LWAGFKGYSQLTG-----QDTKYNFYDAFVVFDDKTSQSAVADWVYNELRVLEERRG    |
| tetTLR9    | FWAECKGYSQLSG-----RDVKYNYDAFVVFDDKTSQSAVADWVYNELRVLEERRG     |
| XtTLR9     | IVATLRSYTKLHD-----KSTEH-FDAFIAFNNTKNSVYRDWVYNELRVLEERRG      |
| mTLR3      | SVHRILGFKEID-----TQAEQFEYTAI IHAHKD---RDWVWEHFSPEEQ---       |
| hTLR3      | SVHRVLGFKEID-----RQTEQFEYAAI IHAHKD---KDWVWEHFSPEEQ---       |
| MdTLR3     | TIHRALGFKEIE-----RQEQFDYAAI IHAQED---SRWIWKYFSPMEEK---       |
| chTLR3     | SINRILGFKELD-----RLPGVFDYDAYVIHARKD---TNWVLTNFTLEEN---       |
| XtTLR3     | SINRILGFKEID-----PRKRNFDYDAYI IHAQND---VSWVENHLIPLKKN---     |
| fTLR3      | VVNRTLGFSS-----DATVEEGRQFEYDAYVIHAEED---GGWVERLLPLENG---     |
| tetTLR3    | MVNRTLGFSS-----DAAVGEGRQFEYDAYVIHAEED---GAWVERLLPLENE---     |
| zebTLR3    | MANRMLGS--LK-----DAKVTEGR-FQFDAYI IHAGED---KSWVERSLLSLEDK--- |
| cfishTLR3  | LVNRTLDINDSR-----YKRVAEGR-YEYKAYVVHAQED---RLWVERSLLPLEDK---  |
| hTLR5      | AQRLVFKDHPQGT-----EPDMYKYDAYLFCFSSKD---FTWVQNALPKHLDTQYS     |
| mTLR5      | IQKLVFKDKVWVSL-----EPGAYRYDAYLFCFSSKD---FEWAQNALPKHLDAHYS    |
| MdTLR5     | FLTLALEYHPQGV-----KEDQHKYDAYLFCFSSKD---FEWVQNAFLNHLDTQYS     |
| XlTLR5     | IISFIIDTEKQEE-----AADTKYDAYLFCFSSKD---FQWVQDAFLQNLDTQYS      |
| XtTLR5     | ILGLIIGNEKKEE-----AADACKYDAYLFCFSSKD---FQWVQDAFLRNLDTQYC     |
| fTLR5      | IMRKVLDAPKPPA-----ITDEQPYDVFLFCFSSKD---YRWVEAAVLKKLDSQLS     |
| tetTLR5    | ILRRVVDDPKRAA-----TADEGQYDVFLFCFSSGD---YRWVEAAVLKKLDSQLS     |
| troutTLR5  | LTARILEGPRRDP-----SADGPRYDAYLFCFSSND---YKWWVETALLNRLDSQFA    |
| mTLR13     | CRAWYLTKWH-----KTEKKFLYDAFVSFSATD---EAWVYKELVPALEEGSQ        |
| ratTLR13   | CRAWYLTKWH-----KTEKKFLYDAFVSFSATD---EAWVYKELVPALEEGSQ        |
| MdTLR13    | FKSLYLAKWH-----RTEREFVYDAFVSFNAAAD---EAWVYKELVPALEEGVQ       |
| XtTLR13    | LEVWFRWLE-----TTDKVHKYDAYI SYCEDD---EIWVVEKLLHMLLEEQQG       |
| chTLR21    | LRCWVNQRWR-----REEKCYLYDSFVSYSNSAD---ESWVLQKLVPELEHG---      |
| XtTLR21    | FVAWLHERWK-----SEKELYKYDAFVSYNTHD---EAWVYKIMLPVLETS---       |
| fTLR21     | FRSWFSEQWRRLR-----EKENCKYDAFISYNSSD---ELWVMNELLPLNLENGG-     |
| fTLR23     | FLAFIYDNRNRKQ-----QNPLP--YDAFVSYNVED---ELWVYEEMLPALDQDQ-     |
| tetTLR23   | LLAFVYDRNRNR-----TRPHG--YDAFVSYNVVD---ELWVYEEMLPALDQDQ-      |
| fTLR22     | FLALLADKKRKNQ-----QTPR--QYDAFVSYNVVD---ELWVYEEMLPALDQDQ-     |
| tetTLR22   | FLALLVDTKYKNR-----ETPH--QYDAFVSYNVVD---ELWVYEEMLPALDQDQ-     |
| halTLR22   | FLALLFDTKHKNK-----QPPN--QYDAFVSYNVVD---EPWVRELLPKLEGEQ-      |
| troutTLR22 | FLAFLYDTKQRNK-----HKPHGCQYDAFVSYNVVD---EPWVRELLPKLEGEQ-      |
| XtTLR22    | TLAFLYNNRRWQK-----KQKCK--YDAFVSYNVVD---EKWVFRQLVPLEGRY-      |
| mTLR12     | FRVWLQGLRGK-G-----DKGKRFVDFVFSHCRQD---QGWVIEELLPALEGLFP      |
| mTLR11     | FHTCWKLCGH-R-----LRG-QFNVDVFI SYCEDD---QAWVLEELVPVLEKAPP     |
| hTLR4      | AGCIKYG-RGEN-----IYDAFVIYSSQD---EDWVRNELLVKNLEEGVP           |
| rabbitTLR4 | VGRKRYG-RGES-----VYDAFVIYSSQD---EDWVRNELLVKNLEEGVP           |
| pigTLR4    | VGCKKYG-RGES-----TYDAFVIYSSQD---EDWVRNELLVKNLEEGVP           |
| mTLR4      | AGCKKYS-RGES-----IYDAFVIYSSQN---EDWVRNELLVKNLEEGVP           |
| MdTLR4     | AGCKNIG-GGES-----IYDAFVIYSSQD---EDWVRNELLVKNLEEGVP           |
| chTLR4     | SGCKHSAERGD-----IYDAFVIHSSKD---QEWVMKELVPELEEGKP             |
| XtTLR4     | NKCKRNHDNNY-----VYDAFVMYSNAD---QLVPKLEN-EN                   |
| zebTLR4    | SGYRSPGQQECS-----YDAFVIFSSYD---EAWVMNELLNLENGVGP             |
| hTLR2      | MWAWLQAKRKPR-----KAPSRNICYDAFVSYSERD---AYWVENLMVQELENFNP     |
| rabbitTLR2 | TWAWLQAKRKPR-----KAACRDVCYDAFVSYSERD---SYWVENLLVQELENSDP     |
| pigTLR2    | MWAWLQAKRKPR-----KAPRRDVCYDAFVSYSERD---SYWVENLMVQELEHFQP     |
| mTLR2      | MWAWLQAKRKPK-----KAPCRDVCYDAFVSYSERD---SHWVENLMVQELENSDP     |
| MdTLR2     | MWAWLQAKRKPR-----RNPDRICYDAFVSYSERD---SHWVENLMVQELENSDP      |
| chTLR2     | TWAWLQAKRKPK-----RAPTKDICYDAFVSYSERD---SNWVENIMVQLEQACP      |
| XtTLR2     | TWAWLKAKRKPL-----KNCDREICYNFVFSYSERD---SEWVENMMVPKLENAVP     |
| fTLR2      | MWAWLKAKHSSRQRRG-LDQRGGAGVEDDFDAFVSYSNRD---AGWVENFLVPELEQPRA |
| halTLR2    | MWAWLRKHSRRRR--LRNRLSEALLSYDAFVSYSERD---AGWVETFLVPELEEPRE    |
| zebTLR2    | TKAWIQAKRKPAVGR-----LPEELRYDAFVSYSQHD---AEWVEEILVAELEDTPQ    |
| hTLR1      | VCQWTQTRRRARNIPL-----EELQRNLQFHAFISYSGHD---SFWVKNELLPNLEKDD- |
| mTLR1      | LCQWTQTRRRARHIPL-----EELQRNLQFHAFISYSGHD---SAWVKNELLPNLEKDD- |
| hTLR6      | VCQWTQTRRRARNIPL-----EELQRNLQFHAFISYSEHD---SAWVKSELVPLEKED-  |
| pigTLR6    | LCQWTQTRRRARNVPL-----EELQRTLQFHAFISYSEHD---SAWVKNELVPCLEKEG- |
| mTLR6      | LCQWTQTRRRARHIPL-----EELQRNLQFHAFISYSEHD---SAWVKNELLPNLEKDD- |
| MdTLR1L    | IFQWARMRRRARNIPL-----DELEKEVQFHAFISYSELD---SPWVKHELLPNLEQEE- |



hTLR10 LGQCTQTWHRVRKTTQ-----EQLKRNVRFHAFISYSEHD---SLWVKNELIPNLEKEDG  
 ratTLR10 LAQCIRTQHRIRKTVR-----EERKRSIQFHAFISYAAHD---SVWVKNELIPNLETEDG  
 MdTLR10 ISQWTQNRHRVRNVPI-----EELKRTIQFHAFISYSEMD---SLWVKSELIIPNLEKEDR  
 chTLR1L1 LWQWTQTKRRAWHDCP-----EERETALQFHAFISYSERD---SLWVKNELIPNLEKEGEG  
 XtTLR1L3 LFRWFRTKHLRLRNVNQ-----QDIQNDKLFHAFISYSQED---SDWVKMMLLPNLERKDG  
 XtTLR1L1 LFRWFRTKHLRLRNVNQ-----QDIQNDKLFHAFISYSQED---SDWVKMMLLPNLERKDG  
 XtTLR1L2 IWQYTRTKQTRTSKQGY----QSLQRDFDFNAFISYSEHD---ASWVKNI FLPSIERSND  
 fTLR1 IWQWMQAKHRARQRQRP----EVLVGGIEFHAFVSYSQD---AAWVFDHLLPNLESPAG  
 tetTLR1 IWQWTRAKHRAR-HQLRP----QDLVGIKFHAFVSYSQD---RDWVVDYLLPNLEGPAG  
 tetTLR14 TFQIIIRAKYRAHKEKA-----AGEEGPFTYHAFISYSHSD---ADWVRDQLLPCLENNND  
 fTLR14 TFQIIIRAKYRAHKEKA-----AGEEGPFTYHAFISYSHSD---ADWVRDQLLPCLENNND  
 XtTLR14 TCSIVQSKYRSRSFHD-----SRD---YNYHAFISYSHSD---ADWVRGELLYRLESCSP  
 XtTLR14L1 MFAIVQSKYRSRNMGN-----TKD---YLYHAFISY-----ADWVRGELLYRLESCSP  
 XtTLR14L2 TWRIVKSKYRSKKSNNK-----SRE---YNYHAFISYSYSD---ADWVRGELLYRLESCSP  
 XtTLR14L3 MCHIVKSKYRSKKAND-----SRE---YNYHAFISYSYSD---ADWVRGELLYRLESCSP  
 XtTLR16 FQIWLKCLRKGTN-----NPIAYEYDAFVSYCSRD---QGWWVNYLVPNLEEKGR  
 chTLR15 GWYWCMAKRQYK-----KRPENKPFDAFISYSEHD---ADWTKEHLLKLETDG--

:  
 .  
 .

MdTLR7 K-----QFNLCLEERDWIPGKPVLENLSHS-IQLSRKTVFVMTNA-----YVK  
 hTLR7 K-----HFNLCLEERDWPGLQPVLENLSQS-IQLSKKTVFVMTDK-----YAK  
 chTLR7 R-----QFNLCLEERDWPGLQPVFNLSQS-IQLSKKTI FVLTNK-----YIK  
 XtTLR7 K-----MLNLCLEERDFLAGQPFLDNLSSES-IQISRKTVFVLTFRK-----YVK  
 tetTLR7 R-----RLALCLEERDWIPGTPLLDNLSQS-IHKSRTVVFILTST-----YIK  
 fTLR7 R-----RLTLCLEERDWIPGTPVIDNLSQS-IHRSKRTVVFILTNT-----YIK  
 hTLR8 K-----NVLLCLEERDWDPLGAI IDNLMQS-INQSKKTVFVLTCK-----YAK  
 pigTLR8 K-----NVLLCLEERDWDPLGAI IDNLMQS-INQSKKTI FVLTCK-----YAK  
 mTLR8 K-----SVLLCLEERDWDPLGPI IDNLMQS-INQSKKTI FVLTCK-----YAK  
 MdTLR8 K-----KVFLCLEERDWDPGIAI IDNLIQS-INQSKKTI FVLTCK-----YAK  
 XtTLR8 K-----HMYLCLEERDWEPEGKAI IDNLAHS-INQSKKTLFVLTCK-----YVK  
 tetTLR8 K-----YLPCLCEERDWTGVPVLDNLTQS-IRYSRKTFLVLTQD-----YVK  
 fTLR8 K-----NLPCLCEERDWTGVPVLDNLTQS-IRYSRKTFLVLTQD-----YVK  
 hTLR9 RW-----ALRLCLEERDWPGLKTLFENLWAS-VYGSRKTFLVLAHT-----DRV  
 pigTLR9 RR-----ALRLCLEERDWPGLKTLFENLWAS-VYSSRKTFLVLAHT-----DRV  
 mTLR9 RR-----ALRLCLEERDWPGLQTLFENLWAS-IYGSRKTFLVLAHT-----DRV  
 ratTLR9 RR-----ALRLCLEERDWPGLQTLFENLWAS-IYGSRKTFLVLAHT-----DKV  
 MdTLR9 RGKGW-----LRFRLCLEERDWPGLKSLIENLWDS-VYKSRKTLFVLSPRRDPLLGQPV  
 fTLR9 RM-----FCLCLEERDWPVGFSCIEENLHNA-VSSSVKTMFVLTSTG-----TIESM  
 tetTLR9 RR-----FCLCLEERDWPVGFSCIEENLHNA-VSSMKTTFVLSND-----TLEPM  
 XtTLR9 GG-----FTLCLEERDWIAGRSSIEENLYDS-IYRSKKTIFVITRE----WFN--  
 mTLR3 DQ-----SLKFCLEERDFEAGVLEAIVNS-IKRSRKII FVITHH-----LLK  
 hTLR3 DQ-----SLKFCLEERDFEAGVFEAIVNS-IKRSRKII FVITHH-----LLK  
 MdTLR3 DH-----SLRFCLCEERDFEAGRPELEAIVHS-IKRSRKII FVVTH-----LLK  
 chTLR3 EQF-----QVKFCLEERDFEAGISEFEAI INC-IRRSRKII FIVTEH-----LLQ  
 XtTLR3 AGS-----KLQFCFEERDLEAGTSLSAFVDC-INRSRKTIFVVTFRN-----LLN  
 fTLR3 -----RCKFCLEVRDSNLGMSQLESIVNN-IRNSRKILFVVTET-----LLM  
 tetTLR3 -----KCKFLEIRDSNPGMSQLESIVNN-IRNSRKILFVVTET-----LLR  
 zebTLR3 -----DLNFFYEQRDSTPGHSRLKTIVDN-MVHSRKITFVITEM-----LLK  
 cfishTLR3 -----DFKFFLEDRDAMPSSRLETIVDN-MRISRKILFVVTFA-----LLN  
 hTLR5 DQ-----NRFNLCFEERDFVPGENRIANIQDA-IWNSRKIVCLVSRHF-----LR  
 mTLR5 SR-----NRLRCLCEERDFIPGENHISNIQAA-VWGSRKTVCVSRHF-----LK  
 MdTLR5 PK-----NRFNLCFEERDFLPGEDHINNIRDA-ICNSKKTICIVTRHF-----LK  
 XlTLR5 DR-----NRFHFCFEERDFVPGEDHIVNIRDA-IWNSKKTICIVTKQF-----LK  
 XtTLR5 DR-----NRFRLCFEERDFIPGEDHIVNIRDA-IWNSKKTICIVQSS-----S  
 fTLR5 D-----NTFRCCLEARDFLPGEDHLSNIRDA-SWGSRKTLCVSKEF-----LK  
 tetTLR5 EG-----NAFRCCFEARDFLPGEDHLSNIRDA-IWGSRKTLCIVSNRF-----LK  
 troutTLR5 ER-----NVLRCCEVRDFIPGEDHLSNIRDA-IWGSRKTVCIVSKGF-----LK  
 mTLR13 -----TTFKLCLEHRDFEPGIDIFENIQNA-INTSRKTL CVVSNH-----YLH  
 ratTLR13 -----TTFKLCLEHRDFEPGIDIFENIQNA-INASRKTLCVVSNN-----YLH  
 MdTLR13 -----PTFKLCLEHRDFELGVDIFENIQNA-INTSRKTL CVVSNN-----YLQ  
 XtTLR13 -----RKFKLCLEPRDFVPGIYHLDNIQDA-ISNSRKTLCVVSRR-----YLE  
 chTLR21 -----AFRLCLHHRDFQPGRSI IDNIVDA-VYNSRKTVCVVSRS-----YLR  
 XtTLR21 -----ALRLCLHHRDFQLGRDI DNIVDS-IHNSRKTICVVSRS-----YLQ  
 fTLR21 -----SSFKICLHHRDFEPGRYI IDNIVSA-VYSSRKTICVVSRR-----FLS  
 fTLR23 -----GWKLCLEHRDFQPGKPI ENITDA-IYNSRKTICVISRS-----YLQ  
 tetTLR23 -----GWKLCLEHRDFQPGKPI ENITDA-IYSSRKTICVISRS-----YLQ  
 fTLR22 -----GWALCLHHRDFEPGKPI ENITDA-IYGSRKTICVISRR-----YLE  
 tetTLR22 -----GWRLCLHHRDFEPGKPI ENITDA-IYGSRKTICVISRR-----YLE  
 halTLR22 -----GWRLCLHHRDFMPGKPI ENIVDA-IYGSRKTICVISRR-----YLE  
 troutTLR22 -----GWKLCLEHRDFQPGKPI IDNIMDG-IYGSRKTICVISRR-----YLE  
 XtTLR22 -----NWLRLHHRDFEPGKAI VDNIVDS-IYSSRKTICVISRR-----YLE  
 mTLR12 AG-----LGLRLCLPERDFEPGKDVVDNVVDS-MLSSRTTLCVLSGQ-----ALC

|            |                                                              |
|------------|--------------------------------------------------------------|
| mTLR11     | EG-----EGLRLCLPARDFGIGNDRMESMIAS-MGKSRATLCVLTGQ-----ALA      |
| hTLR4      | P-----FQLCLHYRDFIPGVAAANIIEHEGFHKSARKVIVVVSQH-----FIQ        |
| rabbitTLR4 | P-----FRLCLHYRDFIPGVAAANIIEHEGFHKSARKVIVVVSQH-----FIQ        |
| pigTLR4    | P-----FHLCLHYRDFIPGVAAANIIEHEGFHKSARKVIVVVSQH-----FIQ        |
| mTLR4      | R-----FHLCLHYRDFIPGVAAANIIEHEGFHKSARKVIVVVSQH-----FIQ        |
| MdTLR4     | S-----FQLCLHYRDFIPGVAAANIIEHEGFHKSARKVIVVISEH-----FIQ        |
| chTLR4     | P-----FQLCLYFRDFLPGVPIVTNIIIEGFLSSRNVIAVISAD-----FLE         |
| XtTLR4     | G-----FIIICLHYRDFVPGVPIVTNISNS-ILNSQKVSVVLSQT-----FLE        |
| zebTLR4    | P-----IQLCLHMRDFQAGKSIASNIIDEGIMGRKIIVVVSQH-----FID          |
| hTLR2      | P-----FKLCLHKRDFIPGKWIIDNIIDS-IEKSHKTVFVLSN-----FVK          |
| rabbitTLR2 | P-----FRLCLHKRDFVPGKWIIDNIIDC-IEKSRKTVFVLSQ-----FVK          |
| pigTLR2    | P-----FKLCLHKRDFIPGKWIIDNIIDS-IEKSQKTIFVLSN-----FVK          |
| mTLR2      | P-----FKLCLHKRDFVPGKWIIDNIIDS-IEKSHKTVFVLSN-----FVR          |
| MdTLR2     | P-----FRLCLHKRDFVPGKWIIDNIIDS-IDKSHKTLFVLSSE-----FVK         |
| chTLR2     | P-----FRLCLHKRDFVPGKWIIDNIIDS-IEKSHKTLFVLSSE-----FVQ         |
| XtTLR2     | P-----MKLCLHKRDFVPGKWIIDNIIDA-MEKSYKTVFVLSSE-----FVR         |
| fTLR2      | DDEAAVR---ARPMTLCLHKRDFLPGHWILDNIMSA-MERSRRTIFVLSN-----FIR   |
| halTLR2    | TDEDSVNHTDPRPLTCLCLHKRDFLPGHWIMDNIMSA-MERSRRTVFLVLSQ-----FVQ |
| zebTLR2    | S-----FSLCLHKRDFVPGKWIIDNIIDS-IEKSRKTVFVLSQ-----FVS          |
| hTLR1      | -----MQICLHERNFVPGKSIVENIITC-IEKSYKSI FVLSPN-----FVQ         |
| mTLR1      | -----IQICLHERNFVPGKSIVENIINF-IEKSYKSI FVLSPH-----FIQ         |
| hTLR6      | -----IQICLHERNFVPGKSIVENIINC-IEKSYKSI FVLSPN-----FVQ         |
| pigTLR6    | -----IKICLHERNFVPGKSIENIINC-IEKSYKSI FVLSPN-----FVQ          |
| mTLR6      | -----IRVCLHERNFVPGKSIENIINF-IEKSYKAI FVLSPH-----FIQ          |
| MdTLR1L    | -----IRICLHERNFVPGKSIENIINC-IEKSHKSI FVLSPN-----FIQ          |
| hTLR10     | S-----ILICLYESYFDPGKSIENIVSF-IEKSYKSI FVLSPN-----FVQ         |
| ratTLR10   | S-----VLLCLPERNDFPDRSIAENIISC-TEKSYKSI FVLSPN-----FVQ        |
| MdTLR10    | S-----ISICLHERNFVPGKSIENIINC-IEKCYKSI FVLSPN-----FVQ         |
| chTLR1L1   | C-----IQLCQHERNFIPGKSIENIINC-IEKSYKSI FVLSPN-----FVQ         |
| XtTLR1L3   | S-----IKICHHERNFIPGKAIENIIDC-IEKSFKSI FVLSPN-----FIQ         |
| XtTLR1L1   | S-----IKICHHERNFIPGKAIENIIDC-IEKSFKSI FVLSPN-----FIQ         |
| XtTLR1L2   | C-----IRICQHERNFIPGKSIENIINC-IEKSYKSI FVLSPN-----FVQ         |
| fTLR1      | G-----LRICHGKNFVPGKPIINNIMTC-VEKSRRCVFLVLSAH-----FVK         |
| tetTLR1    | G-----LRICHHEKNFVPGRTIINNILTC-VETSRRCVFLVLSAH-----FIK        |
| tetTLR14   | P-----YRLCIHERDFTPGRWIIDNIIEN-IEKSRKVI FVLSRH-----FVN        |
| fTLR14     | P-----YRLCIHERDFTPGRWIIDNIIEN-IEKSRKVI FVLSRH-----FVN        |
| XtTLR14    | P-----YRVCIHERDFLPGRWIIDNIIEN-IESSRKII FVLSRN-----FVN        |
| XtTLR14L1  | -----IESSRKII FVLSRN-----FVN                                 |
| XtTLR14L2  | P-----YRVCIHERDFLPGRWIIDNIIEN-IESSRKII FVLSRN-----FIN        |
| XtTLR14L3  | P-----YRVCIHERDFLPGRWIIDNIDN-IETSRTKIFVLSHN-----FVN          |
| XtTLR16    | N-----TIKLCLEHNRDFLVGKDIIDNIMDS-IYKSRKTI CLISYN-----YLQ      |
| chTLR15    | -----FKICYHERDFKPGHPVLGNIFYC-IEKSHKVI FVLSPS-----FVN         |

∴

|         |                                                               |
|---------|---------------------------------------------------------------|
| MdTLR7  | SGNFK-TAFYLSHQRLMDE--KVDVILIFLE--KAFQRSKYLQLRKRLCK-SSVLEWP-   |
| hTLR7   | TENFK-IAFYLSHQRLMDE--KVDVILIFLE--KPFQKSKFLQLRKRLCG-SSVLEWP-   |
| chTLR7  | SGTFK-TTFYMAHQRLLE--KIDVILIFLE--KVLQKSRVYQLRKRLCK-SSVLEWP-    |
| XtTLR7  | KGHFK-TAFYMAHQRLIEE--KVDVILILLE--KTLQRSRYLRLRKDYVQ-----       |
| tetTLR7 | SGSFK-TAFYMAHQRLMDE--KNDVIVLIFLE--KIPNSKYLRLRRRLYR-RSVLEWP-   |
| fTLR7   | SGSFK-TAFYMAHQRLMDE--KNDVIVLIFLE--NIPYNSRYLRLRRRLYR-RSVLEWP-  |
| hTLR8   | SWNFK-TAFYLALQRLMDE--NMDVIVLIFLE--PVLQHSQYLRLRQRICK-SSILQWP-  |
| pigTLR8 | NWNFK-TAFYLALQRLMDE--NMDVIVLIFLE--PVLQHSQYLRLRQRICK-SSILQWP-  |
| mTLR8   | SWNFK-TAFYLALQRLMDE--NMDVIVLIFLE--PVLQYSQYLRLRQRICK-SSILQWP-  |
| MdTLR8  | NWNFK-TAFYLALQRLMDE--NMDVIVLIFLE--PVLQHSQYLRLRRRICK-SSVLKWP-  |
| XtTLR8  | SGKFK-IAFYLALQKLMDE--NMDVIVILLE--PVLQNSQYLKLRKICK-SSIMWEP-    |
| tetTLR8 | TGIFK-MAMYLALQRLLE--NVDVILLMLE--PVLQHSFLRLRRRLCG-ESVLDWP-     |
| fTLR8   | TGIFK-MAMYLALQRLLE--NVDVIVLLE--PVLQHSFLRLRRRLCG-ESVVDWP-      |
| hTLR9   | SGLLR-ASFLLAQRLLED--RKDVVVLVILS--PDGRRSRYVRLRQLCR-QSVLLWP-    |
| pigTLR9 | SGLLR-ASFLLAQRLLED--RKDVVVLVILR--PDAYSRYVRLRQLCR-QSVLLWP-     |
| mTLR9   | SGLLR-TSFLAQRLLED--RKDVVVLVILR--PDAHRSRYVRLRQLCR-QSVLFWP-     |
| ratTLR9 | SGLLR-TSFLAQRLLED--RKDVVVLVILR--PDAHRSRYVRLRQLCR-QSVLFWP-     |
| MdTLR9  | SGLLR-ATFHLAQRLLED--KQDVVVLVILN--RAVGRSRYVRLRQLCR-QTVLFWP-    |
| fTLR9   | SGMIR-QAFFMVQRLLE--KVDVAVLLED--EMFPKLYLQLRKRLCR-KSVLSWP-      |
| tetTLR9 | SGVIR-QAFFMVQRLLE--KVDAAVLLED--ETFPKVKYLQLRKRLCR-KSVLSWP-     |
| XtTLR9  | CGLLR-HAFMNSQRLLE--KKDVVALVLD--HKMKMSQYFLTRKRLCP-KSFLNWP-     |
| mTLR3   | DPLCRRFKVHHAVQQAIEQ--NLDSIILIFLQNIIPDYKLNHALCLRRGMFKSHCILNWP- |
| hTLR3   | DPLCRRFKVHHAVQQAIEQ--NLDSIILVFLLEIPDYKLNHALCLRRGMFKSHCILNWP-  |
| MdTLR3  | DPLCKR-----                                                   |
| chTLR3  | DPWCRKFKVHHALQQAIEQ--SRDSIILIFLHNIQDYKLNHALCLRRGMFRSCCILNWP-  |
| XtTLR3  | DSWCRR-----                                                   |
| fTLR3   | DPWCRRFTAQALHQVIEA--SRDSVVLVFLQDVHDYKLSRTLFLRRGMLRSCCVLYWP-   |
| tetTLR3 | DPWCRRFTAQALHQVIEA--SRDSVVLVFLQDVHDHRLSRTLFLRRGMLRSCCVLYWP-   |

zebTLR3 DPWCRQFKAHHALHHVME--NRDSLILIFLEDVTDYNLNRSLSHLRRGMLKPKCVLYWP-  
 cfishTLR3 DPWCRQFKVHHALHQLMEE--NRDSLVLIFLEDVADYRLTQSLMLRKGMLKHRCLMQLWP-  
 hTLR5 DGWCL-EAFSYAQGRCLSD--LNSALIMVVVGSLSQYQLMKHQSIGRFVQK-QQYLRWP-  
 mTLR5 DGWCL-EAFRYAQSRSLSD--LKSILIVVVVGSLSQYQLMRHETIRGFLQK-QQYLRWP-  
 MdTLR5 DGWCI-EAFNFAQSRYFSD--LKDVLIMVVVAGSLSQYQLMKYPPIRVVFVQR-QPYLKW-  
 XtTLR5 DGWCV-EALNYAQSRYFTD--LKDVLIMVVVGSLSQYQLMKYQPIRAYVKR-CQYLRWP-  
 XtTLR5 DGWSL-S-LNYAQSRYFDE--LKDVLIMVVVGSLSQYQFMKYQPIRAYVKR-AQYLRWP-  
 fTLR5 DGWCL-EAFSLAQGRMLEE--LTNTLVMVVVGKVAHYQLMRCKAVRVFVQK-RQYLTWP-  
 tetTLR5 DGWCL-EAFTLAQGRMLEE--LTNTLVMVVVGKVAHYQLMRCNAVRAVQK-REYLTWP-  
 troutTLR5 DGWCL-EAFTLAQSRMLEE--LRDVLIMVVVGNVPHYRLMKHEGIRTFQK-REYLQWP-  
 mTLR13 SEWCR-LEVQLASMKMFYE--HKDVILILFLEEIPNYKLSYHRLRKLINR-QTFITWP-  
 ratTLR13 SEWCR-LEVQLASMKMFYE--HKDVILILFLEEIPNYKLSYHRLRKLINR-QTFITWP-  
 MdTLR13 SEWCR-LEVQLASLQMFYD--YQDVILILFLEEIPNYRLSSYHRLRKLVKR-QTFITWP-  
 XtTLR13 SEWCR-EEMLQACSWAFSY--KEDVLLMVFLFEEIPEYR-----  
 XtTLR21 SEWCS-LEVQLASYRLLEDE--KQDILVLVLEEDVGDALSAHYHMRRLVLLR-RTYLRWP-  
 XtTLR21 SEWCS-LEMQLASYKLFDE--MRDVLVLLLDNIPDRELSTYHMRKMLK-KTYITWP-  
 fTLR21 SEWCS-LEIQLASYRFLFDE--HRDVLVLLVLEPISEQLSSYHMRKMLK-KTYLQWPG-  
 fTLR23 SEWCS-REIQMASFRLFDE--QKDVLILFLFLEEIPAHQLSPYHMRKMLK-KTYLSWT-  
 tetTLR23 SEWCS-REIQMASFRLFDE--QKDVLILFLFLEEIPAHQLSPYHMRKMLK-KTYLSWA-  
 fTLR22 SEWCS-REIQVASFRLFDE--QKDVLILFLFLEDIPTRQLSPFYRMKMLK-KTYLSW-  
 tetTLR22 SNWCS-REIQVASFRLFDE--RKDVLILFLFLEDIPISQLSPFYRMKMLK-KTYLSW-  
 halTLR22 SEWCS-REMQVASFRLFDE--QKDVLILVFLFLEDIPTDELSPYRMKMLK-MSYLSW-  
 troutTLR22 SEWCS-REIQVASFRLFDE--KQDILVILVFLFLEEIPHQSPYHMRKMLK-RSYLSW-  
 XtTLR22 SEWCS-KEIQLASFRLFEE--HTDVLILFLFLEQIPDHHLSPYHQIRKVIK-KTYLIWP-  
 mTLR12 NPRCR-LELRLATSLLLAAP-SPPVLLLVFLFLEPISRHQLPGYHRLARLLR-GDYCLWP-  
 mTLR11 SPWCN-LELRLATYHLVAP-GTTHLLLVFLFLEPLDRQLHSHYHRLSRWLQK-EDYFDLS-  
 hTLR4 SRWCI-FEYEAQTWQFLSS-RAGIIFIVLQKVEK-TLLRQQVELYRLLSR-NTYLEWED-  
 rabbitTLR4 SRWCI-FEYEAQTWQFLSS-RAGIIFIVLQKVEK-TLLRQQVELYRLLSR-NTYLEWED-  
 pigTLR4 SRWCI-FEYEAQTWQFLSS-RAGIIFIVLQKVEK-TLLRQQVELYRLLSR-NTYLEWED-  
 mTLR4 SRWCI-FEYEAQTWQFLSS-RSGIIFIVLEKVEK-TLLRQQVELYRLLSR-NTYLEWED-  
 MdTLR4 SRWCK-FEYEAQTWQFLSS-QAGIIFILQKVEK-TLLRQQVELYRLLSR-NTYLEWED-  
 chTLR4 SKWCS-FEFDIARSWQLVEG-KAGIIMIILGEVDK-TLLRQRLGLSRYLRR-NTYLEWKN-  
 XtTLR4 SKWCN-FEFEMAKAWQSLEG-SFQIIVILLEXINK-TQLKALGLHLYLAK-TTYLELN-  
 zebTLR4 SSWCR-FEFELAQSRLMER-NANIIIIILEDVAE-RKTKKVFGLHKLK-NTYLKWSR-  
 hTLR2 SEWCK-YELDFSHFRLFDE--NNDAAAILLLEPIEKKAIPQRFCKLRKIMNTRTYLEW-  
 rabbitTLR2 SEWCK-YELDFSHFRLFDE--NNDAAAILLLEPIEKKAIPQRFCKLRKIMNTRTYLEW-  
 pigTLR2 SEWCK-YELDFSHFRLFDE--NDDTAILLLEPIEKKTIQRFCKLRKIMNTRTYLEW-  
 mTLR2 SEWCK-YELDFSHFRLFDE--NNDAAAILLLEPIERKAIPQRFCKLRKIMNTRTYLEW-  
 MdTLR2 SEWCK-YELDFSHFRLFDE--NNDTAILLLEPIEKKTIQRFCKLRKIMNTRTYLEW-  
 chTLR2 SEWCK-YELDFSHFRLFDE--NNDVAILLLEPIQSQAIPKRFCKLRKIMNTRTYLEW-  
 XtTLR2 SEWCK-YELDFSHFRLFDE--NNDTAILLLEPIENETVPRFCKLRKIMNTRTYLEW-  
 fTLR2 SDWCR-YELDFSHFRLFDG-VAGEPAIILLEPLNKDDIPRRFCKLRKLLSSTTYLEW-  
 halTLR2 SDWCR-YELDFSHFRLFDG-DTRGEPAILLLEPLSKDDVPKRFCKLRKLLSSTTYLEW-  
 zebTLR2 SEWCR-YELDFSHFRIMDE--HNSAVLVLEPIKKEKTIQRFCKLRKIMNSRTYLEW-  
 hTLR1 SEWCH-YELYFAHNNLFHE--GSNSLILILLEPIPQYSIPSSYHKLKSLMARRTYLEW-  
 mTLR1 SEWCH-YELYFAHNNLFHE--GSDNLILILLAPIPQYSIPTNYHKLKTLMSRRTYLEW-  
 hTLR6 SEWCH-YELYFAHNNLFHE--GSDNLILILLEPIPQNSIPNKYHKLKSLMARRTYLEW-  
 pigTLR6 SEWCH-YELYFAHNNLFHE--GSDNLILILLDIPQNSIPGKYHKLKALMAQRTYLEW-  
 mTLR6 SEWCH-YELYFAHNNLFHE--GSDNLILILLEPIQNNIPSRYHKLKALMAQRTYLEW-  
 MdTLR1L SEWCH-YELYFAHNNLFHE--RSDNLILILLEPIPQYNIIPAKYHKLKALMARRTYLEW-  
 hTLR10 NEWCH-YELYFAHNNLFHE--NSDNLILILLEPIPFYCIPTRYHKLKALMAQRTYLEW-  
 ratTLR10 NGWCH-NELYLAHNNPFRD--NYDYIIPILLEPIPSYCVPTKFPKLLKALLEKKVYLEW-  
 MdTLR10 SEWCH-YELYFAHNNLFHE--GSDNLILILLEPIHSTAFPS-----  
 chTLR1L SEWCH-YELYFAHNNLFHE--NSNSLILILLEPIPSYVIPARYHKLKALMAKRTYLEW-  
 XtTLR1L3 SDWCH-YELYFAHNNLFHE--NSNNLILILLDIPQYSIPNKYHKLKSLMARRTYLEW-  
 XtTLR1L1 SDWCH-YELYFAHNNLFHE--NSNNLILILLDIPQYLIIPNKYHKLKSLMARRTYLEW-  
 XtTLR1L2 SEWCH-YELYFAHNNLFHE--NSNNLILILLDIPQYLIIPNKYHKLKSLMARRTYLEW-  
 fTLR1 SDWCH-YELYFAHNNLFHE--NSNNLILILLDIPQYLIIPNKYHKLKSLMARRTYLEW-  
 tetTLR1 SNWCH-YELYFAHNNLFHE--SSDSVVLVLEPVPQYLIIPSKYHKLKAMMARRTYLEW-  
 tetTLR14 SEWCH-YELYFAHNNLFHE--TFSDVILVVEKIDPNSLPSKYCKLKLKMLSTKTYLEW-  
 fTLR14 SEWCH-YELYFAHNNLFHE--TFSDVILVVEKIDPNSLPSKYCKLKLKMLSTKTYLEW-  
 XtTLR14 SEWCH-YELYFAHNNLFHE--TFSDVILVVEKIDPNSLPSKYCKLKLKMLSTKTYLEW-  
 XtTLR14L1 SEWCH-YELYFAHNNLFHE--AFEDVILVVEKIDPNSLPSKYCKLKLKMLSTKTYLEW-  
 XtTLR14L2 SEWCH-YELYFAHNNLFHE--AFEDVILVVEKIDPNSLPSKYCKLKLKMLSTKTYLEW-  
 XtTLR14L3 SEWCH-YELYFAHNNLFHE--SFEDVILVVEKIDPNSLPSKYCKLKLKMLSTKTYLEW-  
 XtTLR16 SDWCS-LEMRMATYKLLAE--KNDDLILVFLFLESISGYHLSAYHRLARIVRK-KTYIDWP-  
 chTLR15 SCWCQ-YELYFAEHRVLEDE--NQDSLIMVLEDLPPDSVPQKFSKLRKLLKRTYKLS-

MdTLR7 ----TNPQAHPYFWQCLKNAIATDNDTVYSKVFKETL-----  
 hTLR7 ----TNPQAHPYFWQCLKNAIATDNDTVYSKVFKETV-----  
 chTLR7 ----TNPRSQPYFWQRLKNAIAMNNTLSYNKLLQETV-----

|            |                                                             |
|------------|-------------------------------------------------------------|
| XtTLR7     | -----TLFYI-----                                             |
| tetTLR7    | ---TNPQARPYFWFSLRSVLATESHKQYNNLFKETL---                     |
| fTLR7      | ---TNPQARPYFWFSLRSVLATESHKQYNNLFKETL---                     |
| hTLR8      | ---DNPKAEGFLFWQTLRNVVLTENDSRYNMNVDSIKQY---                  |
| pigTLR8    | ---DNPKAEGFLFWQSLKNVVLTENDSRYSLSLVNSIK---                   |
| mTLR8      | ---NNPKAENLFWQSLKNVVLTENDSRYDDLYIDSIRQY---                  |
| MdTLR8     | ---DNPRAEDLFWQSLKNVVLTDNDRYNNLYVKFIK---                     |
| XtTLR8     | ---KNPNAKGLFWQRMKNVLLTDNCKRYNNFYTDPIENYE---                 |
| tetTLR8    | ---RTAAAEPLFWQNLRLNLRVDNQVMYKNYSKYFTGK---                   |
| fTLR8      | ---RTAAAEPLFWQNLRLNVVRVENQVMYKNYSKYFTSK---                  |
| hTLR9      | ---HQPSGQRSFWAQLGMALTRDNHFFYNRNFCQGPATAE---                 |
| pigTLR9    | ---HQPRGQGSFWAQLGTALTRDNHRHFYNRNFCRGPATAE---                |
| mTLR9      | ---QQPNGQGGFWAQLSTALTRDNHRHFYNQNFRCRGPATAE---               |
| ratTLR9    | ---HQPNGQGSFWAQLSTALTRDNHFFYNRNFCRGPATAE---                 |
| MdTLR9     | ---HQPSGQDSFWAQLCTALATNDRSFYDRNFCRGP---                     |
| fTLR9      | ---RNPKAQPLFWNQLRMALSSDNLSFYDNNMSESEFI---                   |
| tetTLR9    | ---KNPKAQPLFWNQVRMALSSDNLSFYDNNMS---                        |
| XtTLR9     | ---CNPKAHSHFWHMLRIYIRQDSRRCCGSQKQYVDK---                    |
| mTLR3      | ---VQKERINAFHHKLQVALGSRNSAH---                              |
| hTLR3      | ---VQKERIGAFRHKLQVALGSKNSVH---                              |
| MdTLR3     | -----                                                       |
| chTLR3     | ---VQKERINAFHQQLMMALKSNSKVR---                              |
| XtTLR3     | -----                                                       |
| fTLR3      | ---VHKERVPAFHQKLLIALGMTNRLQD---                             |
| tetTLR3    | ---VHKERVAAFHQKLLIALGMTNRLHD---                             |
| zebTLR3    | ---LHKERIPAFHQKLRSLALASTNKVN---                             |
| cfishTLR3  | ---LQKERIPGFPPPEATASVSLE---                                 |
| hTLR5      | ---EDLQDVGWFLHKLKSLQILKK---EKEKKKDN---NIPLQTVATIS---        |
| mTLR5      | ---EDLQDVGWFLDKLSGCILKE---EKGKKRSS---SIQLRTIATIS---         |
| MdTLR5     | ---EDLQDVGWFLNKLKSLRILNK---KEEKKKSN---NIPLQTVATIS---        |
| XlTLR5     | ---EDIQDVEWFLGRLSYQILKENKVEKKLKKSS---NHQLTIETIS---          |
| XtTLR5     | ---EDIQDVEWFLGRLSYQILKENTVEKKPNQASRKPFNHELQNIETIS---        |
| fTLR5      | ---EDPQDLDFWYERLVSLLKLD---TKVKTFAEDKEEAVAQNTESIQLQGIAPQL--- |
| tetTLR5    | ---EDPQDLDFWYQKLSLLKLD---TKVKK---                           |
| troutTLR5  | ---EDTQDIQWFYEKLSKILKD---KKYTSKDNDRDITLVNMTVGT---           |
| mTLR13     | ---DSVHQQLFWARIRNALGKET---VEKENTHLIVVE---                   |
| ratTLR13   | ---DSAHQQPLFWARIRNALGNET---VEKENTHLIVVE---                  |
| MdTLR13    | ---EDFQERPLFWARIRNALGNKT---VREENARLILTDPLGD---              |
| XtTLR13    | -----                                                       |
| chTLR21    | ---LDPAAQPLFWARLKRALRWVEGEEEEEGAGGETLKKWSVALGPNQCSWDAT---   |
| XtTLR21    | ---TEPEAQQLFWAKVQEAIVSGKR---PSEGHQGIKLVKW---                |
| fTLR21     | SECTNPPQAQGLFWSQLRRAIGTTSR---IETEEKGTRVANKEDADASDNHV---     |
| TLR23      | ---QAGRHRAGVFWQNVQRALESQDAPHDQVDPLTG---PAEP---              |
| tetTLR23   | ---QAGRHRAGVFWQNVQRALECGDAPHDRVDPLMG---PAQP---              |
| fTLR22     | ---RAEGHPE-VFWEKLRQALLSKDMLDLKPLARG---ISHKV---              |
| tetTLR22   | ---RAEGHPL-VFWEKLRQALLEKETVQLRRRKNK---NSHHS---              |
| halTLR22   | ---RAAEHTE-LFWEKLRQALRTREDQADESFRLT---VVDNQW---             |
| troutTLR22 | ---RAGEQTG-VFWQQLRLALESKDGSAAENPILSGWRLCDSEP---             |
| XtTLR22    | ---QERNATS-IFWYRVSQALQTEEREDEKCLL---                        |
| mTLR12     | ---EEEEKSGFWTWLRSLRG---                                     |
| mTLR11     | ---QGKVEWNSFCQLKRRLSKAGQERD---                              |
| hTLR4      | ---SVLGRHIFWRRRLRKALLDGKSWNPEGTVGTGCNWQEATSI---             |
| rabbitTLR4 | ---TVLGRHIFWRRRLRKALLDGKTLSPGEMARAENNQEAMTLI---             |
| pigTLR4    | ---SVLGRHIFWRRRLKALLDGKWPSPGTEDESSENQHDTTAFT---             |
| mTLR4      | ---NPLGRHIFWRRRLKALLDGKASNPEQTAEAE---QETATWT---             |
| MdTLR4     | ---TNLGRHVFWRRRLRKALLDGRTKNPKGAAEEEFSPVSPPT---              |
| chTLR4     | ---KEISRHIFWRQLTSVLLGKKNWHEEIKLM---                         |
| XtTLR4     | ---KDLFFWLRLQNSLKNQ---                                      |
| zebTLR4    | ---DPLSNIRFWIRLRKAILQK---                                   |
| hTLR2      | ---MDEAQREGFWVNLRAAIKS---                                   |
| rabbitTLR2 | ---TEEAHAGFWGNLRAAIKS---                                    |
| pigTLR2    | ---ADETQREGFWLNLRAAIKS---                                   |
| mTLR2      | ---LDEGQQEVFWVNLRTAIKS---                                   |
| MdTLR2     | ---RDEGLQEEFWVNLRAAIKS---                                   |
| chTLR2     | ---PDEEQQMFWENLKAALKS---                                    |
| XtTLR2     | ---TDEEQQEVFWDNLKLTALQSEY---                                |
| fTLR2      | ---HGEEKVGEFFWALRKTALRGEEDGRN---                            |
| halTLR2    | ---QEEERRGEFFWRSLSALRGDEE---                                |
| zebTLR2    | ---EDEDKRDEFWSNLRAALQRDEC---                                |
| hTLR1      | ---KEKSKRGLFWANLRAAINIKLTEQAKK---                           |
| mTLR1      | ---TEKNKHGLFWANLRASINVKLVNQAEGTCTYQQ---                     |
| hTLR6      | ---KEKSKRGLFWANIRAAFNMKLTTLVTENNDVKS---                     |

```

pigTLR6      ----KEKSKHGPFWANIRAAFNIKLLVAEEDDVKT-----
mTLR6       ----TEKGRGLFWANLRASFIMKLALVNE-DVKT-----
MdTLR1L1    ----KEKGKQALFWANIRAAFNRKLLTVEANDVEII-----
hTLR10      ----KDRRKCGLFWANLRAAINVNVLATREMYELQTFTELNEESRGSTISLMRTDCL----
ratTLR10    ----KDRRKHGLFWANLRAAINVNLSDTGRCELQTFTKPNADCQGSTISLVRTDSF----
MdTLR10     ---------SIIS-----
chTLR1L1    ----KERSKHALFWANLRAVNVNIKLPST----FETDEEQSDVTSTSSITQCLIK----
XtTLR1L3    ----KEKGKHALFWANLREAIHVNLSIKEEDMADPEITIT-----
XtTLR1L1    ----KEKGKHALFWANLREAIHVNLSIKEEDMADPEVRT-----
XtTLR1L2    ----SEKSKHGLFWANLRAAISIDLTHAESEIPYSISSENPCSSISSENPHSISSENPYSI
fTLR1       ----QDRAKQRLFWANLRAALQADLPHLTVTEIEE-----
tetTLR1     ----QDKAKQRLFWANLRAALQADLPDL-----
tetTLR14    ----QQVNQQAFFWAQLRSVLGRPTAVTRGRQSVRSRTSSASISVIGPLVDERNPEMDED
fTLR14      ----QQVNQQAFFWAQLRSVLGRPTAVTRGRQSVRSRTSSASISVIGPLVDERNPEMDED
XtTLR14     ----SEQNRQHFFWIQLKSI LGKANPPVTQETL-----SVVSETVAYGTCVSET
XtTLR14L1   ----LEHTRQHFFWIQLRSILGKVSSPVIQDDL-----LVDNGAAASWDGPASEA
XtTLR14L2   ----SEPSKQHFFWIQLKSI LGDASVSLAQEGL-----SVVNEAVVG---PVFYL
XtTLR14L3   ----SEPSKQHFFWIQLKNI LGSPSTAGALEP-----CPASEV
XtTLR16     ----QEENEQAFFWERLRMTVLETKED-----
chTLR15     ----PEEHKQKIFWHQLAAVLKTTNEPLVRAENGPNEVDVIEME-----

```

```

MdTLR7      -----
hTLR7       -----
chTLR7      -----
XtTLR7      -----
tetTLR7     -----
fTLR7       -----
hTLR8       -----
pigTLR8     -----
mTLR8       -----
MdTLR8      -----
XtTLR8      -----
tetTLR8     -----
fTLR8       -----
hTLR9       -----
pigTLR9     -----
mTLR9       -----
ratTLR9     -----
MdTLR9      -----
fTLR9       -----
tetTLR9     -----
XtTLR9      -----
mTLR3       -----
hTLR3       -----
MdTLR3      -----
chTLR3      -----
XtTLR3      -----
fTLR3       -----
tetTLR3     -----
zebTLR3     -----
cfishTLR3   -----
hTLR5       -----
mTLR5       -----
MdTLR5      -----
XlTLR5      -----
XtTLR5      -----
fTLR5       -----
tetTLR5     -----
troutTLR5   -----
mTLR13      -----
ratTLR13    -----
MdTLR13     -----
XtTLR13     -----
chTLR21     -----
XtTLR21     -----
fTLR21     -----
fTLR23     -----
tetTLR23    -----
fTLR22     -----
tetTLR22    -----
halTLR22    -----

```

|            |                                |
|------------|--------------------------------|
| troutTLR22 | -----                          |
| XtTLR22    | -----                          |
| mTLR12     | -----                          |
| mTLR11     | -----                          |
| hTLR4      | -----                          |
| rabbitTLR4 | -----                          |
| pigTLR4    | -----                          |
| mTLR4      | -----                          |
| MdTLR4     | -----                          |
| chTLR4     | -----                          |
| XtTLR4     | -----                          |
| zebTLR4    | -----                          |
| hTLR2      | -----                          |
| rabbitTLR2 | -----                          |
| pigTLR2    | -----                          |
| mTLR2      | -----                          |
| MdTLR2     | -----                          |
| chTLR2     | -----                          |
| XtTLR2     | -----                          |
| fTLR2      | -----                          |
| halTLR2    | -----                          |
| zebTLR2    | -----                          |
| hTLR1      | -----                          |
| mTLR1      | -----                          |
| hTLR6      | -----                          |
| pigTLR6    | -----                          |
| mTLR6      | -----                          |
| MdTLR1L    | -----                          |
| hTLR10     | -----                          |
| ratTLR10   | -----                          |
| MdTLR10    | -----                          |
| chTLR1L1   | -----                          |
| XtTLR1L3   | -----                          |
| XtTLR1L1   | -----                          |
| XtTLR1L2   | SSDNPCLGTSENPCSISSENPYSISSENPC |
| fTLR1      | -----                          |
| tetTLR1    | -----                          |
| tetTLR14   | RGTEPNYEVIENSLEVSHQRQIPMVAV--- |
| fTLR14     | RGTEPNYEVIENSLEVSHQRQIPMVAV--- |
| XtTLR14    | PSVPLGKVTLPSS-----             |
| XtTLR14L1  | HHEDEIYETLIPQ-----             |
| XtTLR14L2  | YHI-----                       |
| XtTLR14L3  | PSITYSKINLPGS-----             |
| XtTLR16    | -----                          |
| chTLR15    | -----                          |
